# Supplementary material for: Mining alleles for tar spot complex resistance from CIMMYT's maize Germplasm Bank
Source: Frontiers journal article supplement (doi:10.3389/fsufs.2022.937200), 2022-08-02
Supplement: Table_1.XLSX [file Table_1.XLSX]

## Sheet: Sheet1
Table 1S. Information of CIMMYT gene bank accession IDs, adaptation origins, racial designation and collection locations.
GIDAcc	Acc	GID.Test.cross	Pedigree	GIDHybrid	Hybrid	SampleID	PlantNo	AdaptAcc	AdaptHybrid	AnthesisDate	DaysToSilk	HeteroticGroup	AccID	OIso	CollectingNumber	RACE1	RACE2	PrimaryPurity	GrainType1	GrainType2	GrainType3	GrainColor1	GrainColor2	GrainColor3	Province	Site	LAT.tar.spot	LONG.tar.spot
67	MICHGP10_11	241749	(CML269/CML264)/MICHGP10_11	242913	CML269/CML264	SEEDGWAS678	2	LT	LT	80	76	6	11	MEX	MICH GP10	OLOTIL		NA	C			A	B	I		APATZINGAN	19.05	-102.21
273	GUERGP6_28	241071	(CML269/CML264)/GUERGP6_28	242913	CML269/CML264	SEEDGWAS1	1	LT	LT	77	80	8	28	MEX	GUER GP6	TUXPEN	ZAPGRA	NA	C			A	B			SAN JERONIMO	17.08	-100.28
277	GUER55_36	241751	(CML269/CML264)/GUER55_36	242913	CML269/CML264	SEEDGWAS680	2	LT	LT	80	81	4	36	MEX	GUER 55	TUXPEN		NA	C	F		A	B	K		TLAPEHUALA	18.14	-100.31
749	PUEBGP27_96	241072	(CML495/CML494)/PUEBGP27_96	242919	CML495/CML494	SEEDGWAS2	2	LT	LT	91	92	6	96	MEX	PUEB GP27	TUXPEN		NA	C			A	B			CUETZALAN	20.02	-97.27
807	OAXA58_101	238637	(CML269/CML264)/OAXA58_101	242913	CML269/CML264	SEEDGWAS2075	1	LT	LT	108	108	3	101	MEX	OAXA 58	CONICO		NA	C			B	A	J	NILTEPEC	RIO GRANDE	16.35	-94.36
814	OAXAGP5_102	241073	(CML495/CML494)/OAXAGP5_102	242919	CML495/CML494	SEEDGWAS3	1	LT	LT	92	103	8	102	MEX	OAXA GP5	CONICO	VANDEN	NA	C			A	B		LOMA BONITA	EJIDO EL OBISPO	18.08	-95.56
820	OAXAGP9_106	238638	(CML269/CML264)/OAXAGP9_106	242913	CML269/CML264	SEEDGWAS2076	1	LT	LT	90	96	6	106	MEX	OAXA GP9	CONICO		NA	C			A				TEOTITLAN DEL CAMINO	18.08	-97.01
1478	MICH166_142	238639	(CML495/CML494)/MICH166_142	242919	CML495/CML494	SEEDGWAS2077	2	LT	LT	97	100	6	142	MEX	MICH 166			NA	C			A	B		COAHUAYANA	EL RANCHITO	18.45	-103.4
1486	MICH163_144	238640	(CML495/CML494)/MICH163_144	242919	CML495/CML494	SEEDGWAS2078	2	LT	LT	96	99	6	144	MEX	MICH 163			NA	C			A	B	J		COAHUAYANA	18.45	-103.4
1492	MICH182_145	241752	(CML451/CML486)/MICH182_145	242916	CML451/CML486	SEEDGWAS681	1	LT	LT	91	91	6	145	MEX	MICH 182			NA	C			A				LA NOPALERA	NA	NA
1493	MICH176_146	238641	(CML373/CML311)/MICH176_146	242914	CML373/CML311	SEEDGWAS2079	2	LT	ST	100	103	4	146	MEX	MICH 176	VANDEN		NA	C			A				APATZINGAN	19.05	-102.21
1915	GUER200_177	241754	(CML451/CML486)/GUER200_177	242916	CML451/CML486	SEEDGWAS683	1	LT	LT	88	89	6	177	MEX	GUER 200	VANDEN		NA	C			A			LA UNION	TRONCONES	17.58	-101.48
1961	GUER181_205	242248	(CML269/CML264)/GUER181_205	242913	CML269/CML264	SEEDGWAS1177	2	LT	LT	68	64	8	205	MEX	GUER 181			NA	C			A	J			COYUCA DE CATALAN	18.18	-100.42
2121	OAXA6_241	241076	(CML495/CML494)/OAXA6_241	242919	CML495/CML494	SEEDGWAS6	2	LT	LT	95	97	6	241	MEX	OAXA 6			NA	C			A	B		LOMA BONITA	EJIDO EL OBISPO	18.08	-95.56
2127	OAXA130_245	241756	(CML269/CML264)/OAXA130_245	242913	CML269/CML264	SEEDGWAS685	2	LT	LT	89	89	6	245	MEX	OAXA 130		TEPECI	NA	C			A				TEOTITLAN DEL CAMINO	18.08	-97.01
2193	OAXA158_261	242250	(CML269/CML264)/OAXA158_261	242913	CML269/CML264	SEEDGWAS1179	1	LT	LT	59	63	8	261	MEX	OAXA 158			NA	C			B	A		SAN MIGUEL TLACAMAMA	SAN MIGUEL TLACAMAMA	16.41	-98.06
2233	GUER176_262	242251	(CML269/CML264)/GUER176_262	242913	CML269/CML264	SEEDGWAS1180	2	LT	LT	53	56	8	262	MEX	GUER 176			NA	C			A				ZACOALPA	16.44	-98.17
3314	CHIHGP5_402	242157	(CML451/CML486)/CHIHGP5_402	242916	CML451/CML486	SEEDGWAS1086	1	ST	LT	83	71	2	402	MEX	CHIH GP5	TUXPEN	CONNOR	NA	C			A				CHIHUAHUA	28.39	-106.05
3439	TAMA21_415	241758	(CML451/CML486)/TAMA21_415	242916	CML451/CML486	SEEDGWAS687	1	LT	LT	88	84	6	415	MEX	TAMA 21	TUXPEN		NA	C			A	J		VILLA HIDALGO	SAN JUANA	24.16	-99.29
5352	SNLPGP12_443	238647	(CML495/CML494)/SNLPGP12_443	242919	CML495/CML494	SEEDGWAS2085	2	LT	LT	97	100	6	443	MEX	SNLP GP12	TUXPEN	OLOTIL	NA	C			A	B			COXCATLAN	21.32	-98.53
5368	SNLPGP15_444	241079	(CML269/CML264)/SNLPGP15_444	242913	CML269/CML264	SEEDGWAS9	2	LT	LT	84	85	4	444	MEX	SNLP GP15	TUXPEN	OLOTIL	NA	C			B	J		MUNICIPIO XILITLA	LA CONCHITA	21.24	-98.59
5498	COAHGP7_454	239965	(CML269/CML264)/COAHGP7_454	242913	CML269/CML264	SEEDGWAS3171	2	LT	LT	90	91	6	454	MEX	COAH GP7	TUXPEN		NA	C			A	B			NADADORES	27.03	-101.35
5509	VERA133_459	241080	(CML269/CML264)/VERA133_459	242913	CML269/CML264	SEEDGWAS10	2	LT	LT	91	92	6	459	MEX	VERA 133	TUXPEN		NA	C			A			MIZANTLA	TRONCONES	19.55	-96.51
5548	VERAGP6_476	238650	(CML495/CML494)/VERAGP6_476	242919	CML495/CML494	SEEDGWAS2088	2	LT	LT	104	105	3	476	MEX	VERA GP6	TUXPEN		NA	C			A	J	B	EL PALMAR TEZONAPA	CAMPO EXPERIMENTAL DE HULE	18.3	-96.44
5552	VERAGP8A_478	241086	(CML269/CML264)/VERAGP8A_478	242913	CML269/CML264	SEEDGWAS16	1	LT	LT	98	96	6	478	MEX	VERA GP8A	TUXPEN		NA	C			A	J	K	PAPANTLA DE OLARTE	EL TAJIN	20.28	-97.2
5573	VERAGP9_479	238651	(CML495/CML494)/VERAGP9_479	242919	CML495/CML494	SEEDGWAS2089	2	LT	LT	93	95	6	479	MEX	VERA GP9	TUXPEN		NA	C			A	B	J		CUICHAPA	18.46	-96.52
5579	VERAGP19_480	241087	(CML495/CML494)/VERAGP19_480	242919	CML495/CML494	SEEDGWAS17	2	LT	LT	89	89	6	480	MEX	VERA GP19	TUXPEN		NA	C			A	B	J	TECOLUTLA	LA GUADALUPE	20.37	-96.92
5584	VERAGP20_481	241088	(CML269/CML264)/VERAGP20_481	242913	CML269/CML264	SEEDGWAS18	1	LT	LT	88	94	8	481	MEX	VERA GP20	TUXPEN		NA	C			A	B	J	PAPANTLA	JOSE MARIA MORELOS	20.28	-97.2
5587	VERAGP24_484	241090	(CML495/CML494)/VERAGP24_484	242919	CML495/CML494	SEEDGWAS20	NA	LT	LT	90	90	2	484	MEX	VERA GP24	TUXPEN		NA	C			A	J	B	ALAMO	SAN ANTONIO	20.56	-97.43
5605	VERAGP26_486	241092	(CML269/CML264)/VERAGP26_486	242913	CML269/CML264	SEEDGWAS22	2	LT	LT	86	98	8	486	MEX	VERA GP26	TUXPEN		NA	C			A	B	J	TUXPAN	EL LINDERO	21.01	-97.34
5609	VERAGP30_488	238652	(CML451/CML486)/VERAGP30_488	242916	CML451/CML486	SEEDGWAS2090	1	LT	LT	104	105	3	488	MEX	VERA GP30	TUXPEN		NA	C			A	J	B		TEPETZINTLA	21.09	-97.51
5640	VERAGP34_490	241095	(CML495/CML494)/VERAGP34_490	242919	CML495/CML494	SEEDGWAS25	1	LT	LT	89	89	6	490	MEX	VERA GP34	TUXPEN		NA	C			A	B	J		KM. 82 TAMPICO ALTO	22.07	-97.48
5703	VERAGP36_492	241097	(CML495/CML494)/VERAGP36_492	242919	CML495/CML494	SEEDGWAS27	2	LT	LT	87	87	6	492	MEX	VERA GP36	TUXPEN		NA	C			A	B	J		SAN RAFAEL	20.13	-96.52
5712	VERAGP48_496	241099	(CML495/CML494)/VERAGP48_496	242919	CML495/CML494	SEEDGWAS29	1	LT	LT	88	85	6	496	MEX	VERA GP48	TUXPEN		NA	C			B	J		ALAMO	SOMBRERETE	20.55	-97.49
5723	CHIS66_504	241101	(CML269/CML264)/CHIS66_504	242913	CML269/CML264	SEEDGWAS31	1	LT	LT	90	92	6	504	MEX	CHIS 66			NA	C			B				OCOZOCOAUTLA	16.46	-93.23
5727	CHIS99_506	241102	(CML495/CML494)/CHIS99_506	242919	CML495/CML494	SEEDGWAS32	2	LT	LT	88	88	6	506	MEX	CHIS 99	TUXPEN		NA	C			A	B			VENUSTIANO CARRANZA	16.2	-92.34
5728	CHIS233_507	241103	(CML269/CML264)/CHIS233_507	242913	CML269/CML264	SEEDGWAS33	2	LT	LT	98	98	6	507	MEX	CHIS 233	TUXPEN7		7	C			A	B			ACAPETAHUA	15.17	-92.42
5740	YUCAGP8_523	241761	(CML451/CML486)/YUCAGP8_523	242916	CML451/CML486	SEEDGWAS690	1	LT	LT	89	87	6	523	MEX	YUCA GP8	NALTEL6		6	C			A	J			TIZIMIN	21.09	-88.09
5792	JALI183_577	242838	(CML373/CML311)/JALI183_577	242914	CML373/CML311	SEEDGWAS1767	1	ST	ST	62	62	4	577	MEX	JALI 183	TABLON	CELAYA	NA	C			A				GUADALAJARA	20.4	-103.2
5809	JALI187_601	242259	(CML495/CML494)/JALI187_601	242919	CML495/CML494	SEEDGWAS1188	1	LT	LT	92	94	6	601	MEX	JALI 187	TUXPEN	CELAYA	NA	C			A	B		AUTLAN	EL ZAPOTILLO	19.46	-104.21
5829	JALIGP42_613	238657	(CML269/CML264)/JALIGP42_613	242913	CML269/CML264	SEEDGWAS2095	2	LT	LT	91	91	6	613	MEX	JALI GP42	TABLON	PEPITI	NA	C			B	J	A	JILOTLAN	RANCHO SAN FRANCISCO	19.23	-103.01
5914	VERA66_680	241108	(CML269/CML264)/VERA66_680	242913	CML269/CML264	SEEDGWAS38	1	LT	LT	100	101	3	680	MEX	VERA 66	TUXPEN	TEPECI	NA	C			A			PAPANTLA DE OLARTE	EL TAJIN	20.28	-97.2
5915	VERA68_682	241763	(CML451/CML486)/VERA68_682	242916	CML451/CML486	SEEDGWAS692	1	LT	LT	92	94	6	682	MEX	VERA 68	TUXPEN8		8	C			A	B		PAPANTLA DE OLARTE	EL TAJIN	20.28	-97.2
5920	VERA197_697	238659	(CML269/CML264)/VERA197_697	242913	CML269/CML264	SEEDGWAS2097	2	LT	LT	111	112	3	697	MEX	VERA 197	TUXPEN		NA	C			A				CERRO AZUL	21.11	-97.44
5962	CAMP20_729	241765	(CML269/CML264)/CAMP20_729	242913	CML269/CML264	SEEDGWAS694	2	LT	LT	89	92	6	729	MEX	CAMP 20	DZITBA6		6	C			A	J	K	HOPELCHEN	ICH-EK	19.73	-89.96
5985	CHIS108_761	241118	(CML269/CML264)/CHIS108_761	242913	CML269/CML264	SEEDGWAS48	1	LT	LT	77	74	6	761	MEX	CHIS 108	ZAPCHI		NA	C			A	J	B		ESCUINTLA	15.2	-92.4
6296	CHIS223_763	241119	(CML269/CML264)/CHIS223_763	242913	CML269/CML264	SEEDGWAS49	2	LT	LT	80	79	4	763	MEX	CHIS 223	ZAPCHI	TUXPEN	NA	C			A	B	J	ESCUINTLA	SAN FELIPE	15.2	-92.4
6298	CHIS171_790	239136	(CML373/CML311)/CHIS171_790	242914	CML373/CML311	SEEDGWAS2342	2	ST	ST	100	104	5	790	MEX	CHIS 171	OLOTIL	TUXPEN	NA	C			A			MAZAPA	MAZAPA RIVERA DEL RIO AMATENANGO (GRIJALVA)	15.24	-92.1
6483	YUCA48_828	242267	(CML495/CML494)/YUCA48_828	242919	CML495/CML494	SEEDGWAS1196	1	LT	LT	96	98	6	828	MEX	YUCA 48	NALTEL	TUXPEN	NA	C			A	J	B		ESPITA	21.01	-88.17
6485	YUCA81_830	241767	(CML451/CML486)/YUCA81_830	242916	CML451/CML486	SEEDGWAS696	2	LT	LT	88	86	6	830	MEX	YUCA 81	NALTEL	TUXPEN	NA	C	F		A	B			DZITAS	20.51	-88.31
6623	YUCA62_833	241768	(CML451/CML486)/YUCA62_833	242916	CML451/CML486	SEEDGWAS697	1	LT	LT	88	90	6	833	MEX	YUCA 62	NALTEL	TUXPEN	NA	C			A	B			TIZIMIN	21.09	-88.09
6630	YUCA64_835	241122	(CML495/CML494)/YUCA64_835	242919	CML495/CML494	SEEDGWAS52	2	LT	LT	91	93	6	835	MEX	YUCA 64	NALTEL	TUXPEN	NA	C			A	J			TIZIMIN	21.09	-88.09
6660	YUCAGP12_848	241769	(CML451/CML486)/YUCAGP12_848	242916	CML451/CML486	SEEDGWAS698	1	LT	LT	88	88	6	848	MEX	YUCA GP12	DZITBA6		6	C			A				TEKAX	20.13	-89.17
6662	YUCAGP16_851	241770	(CML451/CML486)/YUCAGP16_851	242916	CML451/CML486	SEEDGWAS699	1	LT	LT	90	89	2	851	MEX	YUCA GP16	DZITBA6		6	C	A		J				TECOH	20.44	-89.29
6688	HOND66_880	242269	(CML269/CML264)/HOND66_880	242913	CML269/CML264	SEEDGWAS1198	2	LT	LT	68	64	8	880	HND	HOND 66			NA	C	F		A	J	B	CORTES	ALDEA MONTERREY	15.3	-88
6727	CRIC249_962	241127	(CML269/CML264)/CRIC249_962	242913	CML269/CML264	SEEDGWAS57	1	LT	LT	84	84	4	962	CRI	CRIC 249	CLAVIL	SALVAD	NA	F	C		A	B		GUANACASTE	CANAS DULCES LIBERIA	10.24	-85.07
6747	PANA121_996	241129	(CML269/CML264)/PANA121_996	242913	CML269/CML264	SEEDGWAS59	2	LT	LT	90	89	2	996	PAN	PANA 121	CLAVIL	SALVAD	NA	F	C		B	I		CHIRIQUI	BUENAVISTA BUGABA CONCEPCION	8.31	-82.37
6748	HONDGP5_1001	242272	(CML269/CML264)/HONDGP5_1001	242913	CML269/CML264	SEEDGWAS1201	2	LT	LT	68	71	1	1001	HND	HOND GP5	SALVAD7		7	C	F		A	B	K	FRANCISCO MORAZAN	TALANGA	14.15	-87.15
6749	HONDGP18_1006	242273	(CML269/CML264)/HONDGP18_1006	242913	CML269/CML264	SEEDGWAS1202	2	LT	LT	69	73	8	1006	HND	HOND GP18	SALVAD6		6	C	F		B	J	A	COMAYAGUA	AJUTERIQUE	14.23	-87.43
6751	PANAGP99_1045	241130	(CML269/CML264)/PANAGP99_1045	242913	CML269/CML264	SEEDGWAS60	1	LT	LT	95	101	6	1045	PAN	PANA GP99	CARIAC		NA	A	F		B	A	I	PANAMA	MAJE RESERVA INDIGENA CHEPO	9.1	-79.06
6756	GUAD11_1056	241773	(CML269/CML264)/GUAD11_1056	242913	CML269/CML264	SEEDGWAS702	2	LT	LT	85	85	5	1056	GLP	GUAD 11	EARCAR8		8	C			J	B			SAINTE ROSE	16.33	-61.68
6766	COMPUECENT6_1061	241133	(CML269/CML264)/COMPUECENT6_1061	242913	CML269/CML264	SEEDGWAS63	1	LT	LT	82	84	4	1061	NIC	COMPUE CENT 6			NA	C	F		B	J			NICARAGUA	12.87	-85.14
6776	GUAT765_1063	242275	(CML269/CML264)/GUAT765_1063	242913	CML269/CML264	SEEDGWAS1204	1	LT	LT	62	63	8	1063	GTM	GUAT 765	NTBLTB9		9	C	F		A	J		JUTIAPA	EL PROGRESO	14.21	-89.51
6778	GUAT253_1065	242276	(CML269/CML264)/GUAT253_1065	242913	CML269/CML264	SEEDGWAS1205	2	LT	LT	62	60	1	1065	GTM	GUAT 253	TEPECI		NA	C			A	J		EL PROGRESO	ESPIRITU SANTO	14.55	-90.03
6784	GUAT123_1071	241774	(CML269/CML264)/GUAT123_1071	242913	CML269/CML264	SEEDGWAS703	1	LT	LT	76	73	8	1071	GTM	GUAT 123	TEPECI		NA	C			A			GUATEMALA	EL PLANETA SAN JOSE DEL GOLFO	14.35	-90.31
6791	GUAT314_1074	241775	(CML269/CML264)/GUAT314_1074	242913	CML269/CML264	SEEDGWAS704	1	LT	LT	79	80	4	1074	GTM	GUAT 314	COMITE	TEPECI	NA	C			A	D	B	SAN MARCOS	VIRGINIA SAN PABLO	14.57	-91.45
6794	GUAT155_1077	241776	(CML451/CML486)/GUAT155_1077	242916	CML451/CML486	SEEDGWAS705	1	LT	LT	90	85	6	1077	GTM	GUAT 155	COMITE		NA	C	A		A	J		SUCHITEPEQUEZ	SAN AGUSTIN CHOCOLA	14.3	-91.3
6800	GUAT793_1085	241134	(CML269/CML264)/GUAT793_1085	242913	CML269/CML264	SEEDGWAS64	2	LT	LT	90	95	6	1085	GTM	GUAT 793	OLOTON		NA	C	F		A	K		ALTA VERAPAZ	VEGA LARGA SAN CRISTOBAL	15.28	-90.2
6901	GUAT704_1087	241777	(CML269/CML264)/GUAT704_1087	242913	CML269/CML264	SEEDGWAS706	2	LT	LT	83	82	4	1087	GTM	GUAT 704	SALVAD	TEPECI	NA	F	C		B	A		ALTA VERAPAZ	PANZOS	15.25	-89.46
6933	GUAT92_1096	242282	(CML269/CML264)/GUAT92_1096	242913	CML269/CML264	SEEDGWAS1211	2	LT	LT	68	68	1	1096	GTM	GUAT 92	TUXPEN	NALTEL	NA	C	F		B	J	A	EL PROGRESO	FINCA EL PALMO ACASAGUASTLAN	14.55	-90.03
6977	GUAT209_1099	241135	(CML269/CML264)/GUAT209_1099	242913	CML269/CML264	SEEDGWAS65	1	LT	LT	79	78	4	1099	GTM	GUAT 209	TUSON		NA	F	C		B	A		ZACAPA	EL ALTO	14.57	-89.25
7061	CUBA86_1108	241136	(CML269/CML264)/CUBA86_1108	242913	CML269/CML264	SEEDGWAS66	1	LT	LT	85	86	4	1108	CUB	CUBA 86	CHANDE	FTCUBA	NA	C			B	J		ORIENTE	VENTA DE CASANOVA CONTRAMAESTRE	20.18	-76.13
7084	HAIT46_1112	241782	(CML451/CML486)/HAIT46_1112	242916	CML451/CML486	SEEDGWAS711	2	LT	LT	90	88	6	1112	HTI	HAIT 46	HAITWH8		8	C	F		A	B		SAN MARC	BOREL	19.07	-72.42
7091	PUER22_1126	241139	(CML269/CML264)/PUER22_1126	242913	CML269/CML264	SEEDGWAS69	1	LT	LT	82	81	4	1126	PRI	PUER 22	TUSON	CHANDE	NA	C			B	J			AGUADA	18.23	-67.11
7098	ANTI8_1130	241784	(CML269/CML264)/ANTI8_1130	242913	CML269/CML264	SEEDGWAS713	1	LT	LT	87	89	8	1130	ATG	ANTI 8			NA	F	C		B	J			PARHAM	NA	NA
7101	CUBA71_1132	241785	(CML269/CML264)/CUBA71_1132	242913	CML269/CML264	SEEDGWAS714	2	LT	LT	85	85	8	1132	CUB	CUBA 71	CUBAAM	TUSON	NA	F	C		B	J		JATIBONICO	TRILLADERAS	21.93	-79.1
7138	GUATGP6-1A_1158	239969	(CML269/CML264)/GUATGP6-1A_1158	242913	CML269/CML264	SEEDGWAS3175	1	LT	LT	89	89	6	1158	GTM	GUAT GP6-1A	OLOTIL	DZITBA	NA	C			A			JUTIAPA	TENCAL MITA	14.16	-89.53
7152	GUATGP18-2A_1181	241142	(CML269/CML264)/GUATGP18-2A_1181	242913	CML269/CML264	SEEDGWAS72	2	LT	LT	84	87	6	1181	GTM	GUAT GP18-2A	OLOTON		NA	C			A	B	J	PETEN	SAYAJCHE	16.3	-90.1
7156	GUATGP23-2A_1190	241787	(CML269/CML264)/GUATGP23-2A_1190	242913	CML269/CML264	SEEDGWAS716	1	LT	LT	92	91	6	1190	GTM	GUAT GP23-2A	OLOTON	TEPECI	NA	C			B	A	F	ALTA VERAPAZ	TOCUM	15.28	-90.2
7204	GUAT100_1202	241143	(CML495/CML494)/GUAT100_1202	242919	CML495/CML494	SEEDGWAS73	1	LT	LT	87	89	6	1202	GTM	GUAT 100	SALVAD	TEPECI	NA	C	F		A	B		IZABAL	LA FRANCIA MORALES	15.22	-89.06
7205	GUAT103_1205	241790	(CML451/CML486)/GUAT103_1205	242916	CML451/CML486	SEEDGWAS719	2	LT	LT	88	86	6	1205	GTM	GUAT 103	TUXPEN	OLOTON	NA	C	F		A	K	B	IZABAL	MANACA PUERTO BARRIOS	15.22	-89.06
7210	SVIN3_1211	241791	(CML451/CML486)/SVIN3_1211	242916	CML451/CML486	SEEDGWAS720	1	LT	LT	88	86	6	1211	VCT	SVIN 3	COSTCR7		7	C	F		B	J		ST. GEORGE	CA. KINGSTOWN	13.13	-61.21
7218	GUAT262_1214	242287	(CML495/CML494)/GUAT262_1214	242919	CML495/CML494	SEEDGWAS1216	2	LT	LT	61	75	8	1214	GTM	GUAT 262	CLAVIL	NALTEL	NA	C	F		B	D	J	ZACAPA	LAS CARRETAS	14.57	-89.25
7233	COMPCENTROAMERICANO3_1224	241792	(CML269/CML264)/COMPCENTROAMERICANO3_1224	242913	CML269/CML264	SEEDGWAS721	1	LT	LT	87	84	6	1224	NIC	COMP. CENTROAMERICANO 3			NA	C			B	J			MANAGUA	12.09	-86.17
7243	SCROGP1_1231	241147	(CML269/CML264)/SCROGP1_1231	242913	CML269/CML264	SEEDGWAS77	2	LT	LT	82	83	4	1231	VIR	SCRO GP1	STCROI		NA	C			B	J	I		CHRISTIANSTED	17.74	-64.7
7250	RDOMGP8_1235	241150	(CML269/CML264)/RDOMGP8_1235	242913	CML269/CML264	SEEDGWAS80	2	LT	LT	80	83	7	1235	DOM	RDOM GP8	CHANDE		NA	C			B	J	F	LA VEGA	FINCA JUMA 2 KILOMETROS SUR DE BANAO	19.11	-70.3
7256	TRINGP1_1237	241793	(CML269/CML264)/TRINGP1_1237	242913	CML269/CML264	SEEDGWAS722	2	LT	LT	95	96	6	1237	TTO	TRIN GP1+			NA	C			B	J		CA. SAN FERNANDO	HERMITAGE	10.16	-61.27
7290	CUBAGP6_1250	241151	(CML269/CML264)/CUBAGP6_1250	242913	CML269/CML264	SEEDGWAS81	1	LT	LT	86	86	5	1250	CUB	CUBA GP6	CHANDE	FTCUBA	NA	C			B	J		ORIENTE	VENTA DE CASANOVA CONTRAMAESTRE	20.18	-76.13
7344	HAITGP1_1252	242293	(CML495/CML494)/HAITGP1_1252	242919	CML495/CML494	SEEDGWAS1222	1	LT	LT	87	89	6	1252	HTI	HAIT GP1	HAITYE8		8	C	F		B	J		TROU-BAGUETE	MONTROUIS	18.85	-73.07
7352	HAITGP5_1256	241795	(CML451/CML486)/HAITGP5_1256	242916	CML451/CML486	SEEDGWAS724	1	LT	LT	94	97	6	1256	HTI	HAIT GP5	HAITYE	EARCAR	NA	C	F		B	J	A	DISTRICTO JEREMIE	MORON-LA FERME	19.6	-72.71
7362	RDOMGP5_1262	241796	(CML269/CML264)/RDOMGP5_1262	242913	CML269/CML264	SEEDGWAS725	2	LT	LT	86	86	5	1262	DOM	RDOM GP5	CHANDE		NA	C			B	J		SANCHEZ	LA MATA 2 KILOMETROS NOROESTE DE COTUI	19.14	-69.36
7363	RDOMGP10_1266	241797	(CML269/CML264)/RDOMGP10_1266	242913	CML269/CML264	SEEDGWAS726	2	LT	LT	83	81	6	1266	DOM	RDOM GP10	CHANDE		NA	C			B	J	D	EL SEIBO	GUAYABO DULCE LOTE JALONJA	18.45	-69.05
7384	RDOMGP14_1270	241155	(CML269/CML264)/RDOMGP14_1270	242913	CML269/CML264	SEEDGWAS85	2	LT	LT	84	83	6	1270	DOM	RDOM GP14	CHANDE		NA	C			B	J	D	LA VEGA	EL PINO	19.11	-70.3
7450	SCROGP3_1280	241799	(CML269/CML264)/SCROGP3_1280	242913	CML269/CML264	SEEDGWAS728	1	LT	LT	88	90	6	1280	VIR	SCRO GP3	CHANDE		NA	C			B	J			CHRISTIANSTED	17.04	-64.04
7473	TOBAGP2_1289	241157	(CML269/CML264)/TOBAGP2_1289	242913	CML269/CML264	SEEDGWAS87	1	LT	LT	95	96	6	1289	TTO	TOBA GP2			NA	C			B	J		RD. SCARBOROUG -GOOD	MOUNT ST. GEORGE	11.2	-60.68
7495	GUADGP2_1292	241159	(CML269/CML264)/GUADGP2_1292	242913	CML269/CML264	SEEDGWAS89	1	LT	LT	76	76	4	1292	GLP	GUAD GP2	EARCAR		NA	C			J	F			SAINTE ANNE	16.23	-61.36
7587	CUBA79_1303	241160	(CML269/CML264)/CUBA79_1303	242913	CML269/CML264	SEEDGWAS90	1	LT	LT	81	79	6	1303	CUB	CUBA 79	CUBAAM	TUSON	NA	C			B	J	F	ORIENTE	LIMPIO CHIQUITO CACOCUM	20.44	-76.23
7591	HAIT16_1306	241800	(CML269/CML264)/HAIT16_1306	242913	CML269/CML264	SEEDGWAS729	1	LT	LT	90	89	2	1306	HTI	HAIT 16	HAITYE		NA	F	C		B			TROU-BAGUETE	MONTROUIS	18.85	-73.07
7607	HAIT20_1307	241801	(CML451/CML486)/HAIT20_1307	242916	CML451/CML486	SEEDGWAS730	2	LT	LT	94	95	6	1307	HTI	HAIT 20	HAITYE8		8	C	F		B			SAN MARC	VERRETES	19.07	-72.42
7621	HAIT38_1312	241161	(CML269/CML264)/HAIT38_1312	242913	CML269/CML264	SEEDGWAS91	1	LT	LT	94	97	6	1312	HTI	HAIT 38	CANILL8		8	C	F		B	J		DISTRICTO JEREMIE	MORON-LA FERME	19.6	-72.71
7624	RDOM270_1315	241162	(CML269/CML264)/RDOM270_1315	242913	CML269/CML264	SEEDGWAS92	1	LT	LT	81	83	4	1315	DOM	RDOM 270	CHANDE		NA	C			B	J		PUERTO PLATA	GUANANICO 11 KILOMETROS OESTE IMBERT	19.48	-70.41
7626	RDOM308_1318	241803	(CML451/CML486)/RDOM308_1318	242916	CML451/CML486	SEEDGWAS732	1	LT	LT	88	85	6	1318	DOM	RDOM 308			NA	C	F		F	B	J	SAN JUAN	MATAYAYA 15 KILOMETROS DE ELIAS PINA	18.4,19	-71.04,-70.67
7639	PUER14_1329	242317	(CML495/CML494)/PUER14_1329	242919	CML495/CML494	SEEDGWAS1246	1	LT	LT	89	78	8	1329	PRI	PUER 14	TUSON	CHANDE	NA	C	F		B	F		NAGUABO	ARENAS BLANCAS	18.21	-65.73
7654	PUER2_1331	241805	(CML451/CML486)/PUER2_1331	242916	CML451/CML486	SEEDGWAS734	1	LT	LT	88	86	6	1331	PRI	PUER 2	CHANDE7		7	C	F		J	B			RD. VEGA ALTA-QUEBRADILLA	18.25	-66.04
7658	SCRO4_1334	241165	(CML495/CML494)/SCRO4_1334	242919	CML495/CML494	SEEDGWAS95	1	LT	LT	87	87	6	1334	VIR	SCRO 4	STCROI		NA	C			J	B			CHRISTIANSTED	17.74	-64.7
7664	SVIN1_1341	241166	(CML269/CML264)/SVIN1_1341	242913	CML269/CML264	SEEDGWAS96	2	LT	LT	84	79	6	1341	VCT	SVIN 1	COSTCR8		8	F	C		B			OTTLEY HALL ESTATE	CA. KIGSTOWN	13.13	-61.21
7673	TOBA14_1345	242319	(CML495/CML494)/TOBA14_1345	242919	CML495/CML494	SEEDGWAS1248	1	LT	LT	90	87	6	1345	TTO	TOBA 14	TUSON	PUYA	NA	C			F				PEMBROKE	11.21	-60.61
7691	GREN3_1360	241810	(CML269/CML264)/GREN3_1360	242913	CML269/CML264	SEEDGWAS739	1	LT	LT	92	92	6	1360	GRD	GREN 3	EARCAR	TUSON	NA	C	F		B	J	A	ST. DAVIDS	CORINTH VILLAGE	12.03	-61.66
7693	GREN13_1362	241811	(CML269/CML264)/GREN13_1362	242913	CML269/CML264	SEEDGWAS740	1	LT	LT	93	93	6	1362	GRD	GREN 13	EARCAR	HAITWH	NA	C	F		A	B	J	ST. GEORGES	BEAUSE JOUR	12.05	-61.75
7695	TRIN21_1364	241168	(CML269/CML264)/TRIN21_1364	242913	CML269/CML264	SEEDGWAS98	2	LT	LT	95	95	6	1364	TTO	TRIN 21	TUSON		NA	C	F		B			RD. PORT OF SPAIN-SAN	CHASE VILLAGE	10.39	-61.31
7708	TRIN42_1369	241169	(CML495/CML494)/TRIN42_1369	242919	CML495/CML494	SEEDGWAS99	2	LT	LT	90	90	2	1369	TTO	TRIN 42	TUSON		NA	C			B	J		CARONI	CHAGUANAS	10.31	-61.25
8178	COAH15_1754	240615	(CML269/CML264)/COAH15_1754	242913	CML269/CML264	SEEDGWAS3819	1	LT	LT	102	104	3	1754	MEX	COAH 15	TUXPEN	FASCIA	NA	C			A			ZARAGOZA	RANCHO EL CANAL	28.3	-100.56
8190	VERA81_1759	241171	(CML269/CML264)/VERA81_1759	242913	CML269/CML264	SEEDGWAS101	1	LT	LT	103	105	3	1759	MEX	VERA 81	TUXPEN		NA	C			B	A		PAPANTLA DE OLARTE	EL TAJIN	20.28	-97.2
8199	CAMP5_1767	241174	(CML269/CML264)/CAMP5_1767	242913	CML269/CML264	SEEDGWAS104	1	LT	LT	92	92	6	1767	MEX	CAMP 5	TUXPEN	NALTEL	NA	C			A	B	J		HOPELCHEN	19.45	-89.51
8237	YUCA151_1792	241175	(CML269/CML264)/YUCA151_1792	242913	CML269/CML264	SEEDGWAS105	2	LT	LT	90	92	6	1792	MEX	YUCA 151	TUXPEN	NALTEL	NA	C			A	B			SANTA ROSA	20.36	-90.06
8287	GUAT335_1819	242855	(CML373/CML311)/GUAT335_1819	242914	CML373/CML311	SEEDGWAS1784	1	ST	ST	62	62	4	1819	GTM	GUAT 335	TEPECI	NALTEL	NA	C	F		A			CHIQUIMULA	EL CUJE QUEZALTEPEQUE	14.47	-89.33
8294	GUAT97_1841	241176	(CML269/CML264)/GUAT97_1841	242913	CML269/CML264	SEEDGWAS106	2	LT	LT	96	98	6	1841	GTM	GUAT 97	SALVAD	OLOTON	NA	C	F		A			IZABAL	MIRAMAR LIVINGSTON	15.48	-88.46
8345	GUAT153_1861	238667	(CML495/CML494)/GUAT153_1861	242919	CML495/CML494	SEEDGWAS2105	2	LT	LT	98	97	6	1861	GTM	GUAT 153	TEHUA		NA	C			A	B		SUCHITEPEQUEZ	EL JOBO CHOCOLA	14.3	-91.3
8349	GUAT597_1866	241820	(CML451/CML486)/GUAT597_1866	242916	CML451/CML486	SEEDGWAS749	2	LT	LT	89	89	6	1866	GTM	GUAT 597	TEPECI9		9	C			A	J	B	SACATEPEQUEZ	CHAPINAS MONTE REY	14.3	-91.3
8355	GUATGP33-1A_1899	241181	(CML269/CML264)/GUATGP33-1A_1899	242913	CML269/CML264	SEEDGWAS111	2	LT	LT	77	78	4	1899	GTM	GUAT GP33-1A	TEPECI	OLOTON	NA	C	F		A	B		ALTA VERAPAZ	PANZOS	15.25	-89.46
8805	CAMP2_2106	241183	(CML269/CML264)/CAMP2_2106	242913	CML269/CML264	SEEDGWAS113	1	LT	LT	79	78	4	2106	MEX	CAMP 2	TUXPEN		NA	C			A	B	J		LERMA	19.47	-90.37
8809	CAMP3_2107	241184	(CML269/CML264)/CAMP3_2107	242913	CML269/CML264	SEEDGWAS114	1	LT	LT	90	92	6	2107	MEX	CAMP 3	TUXPEN		NA	C			A	B		VALLADOLID	SANTA INES	NA	NA
8829	CAMP45_2110	241185	(CML269/CML264)/CAMP45_2110	242913	CML269/CML264	SEEDGWAS115	2	LT	LT	90	92	6	2110	MEX	CAMP 45	TUXPEN	DZITBA	NA	C			B	A	J		TIQUIMUL	19.46	-90.14
8844	CAMP99_2118	241187	(CML269/CML264)/CAMP99_2118	242913	CML269/CML264	SEEDGWAS117	1	LT	LT	90	93	6	2118	MEX	CAMP 99	TUXPEN	NALTEL	NA	F			A	B	J		ESCARCEGA	18.37	-90.43
8899	COAH59_2130	240622	(CML269/CML264)/COAH59_2130	242913	CML269/CML264	SEEDGWAS3826	1	LT	LT	94	97	6	2130	MEX	COAH 59	TUXPEN		NA	C			A	B		MUNICIPIO ZARAGOZA	RANCHO SANTA FE	28.27	-100.56
8901	COLI14_2134	241822	(CML269/CML264)/COLI14_2134	242913	CML269/CML264	SEEDGWAS751	1	LT	LT	98	98	6	2134	MEX	COLI 14	VANDEN		NA	C			A				COQUIMATLAN	19.12	-103.48
8903	CHIS4_2140	241188	(CML495/CML494)/CHIS4_2140	242919	CML495/CML494	SEEDGWAS118	1	LT	LT	87	84	6	2140	MEX	CHIS 4			NA	C			A	J			COLONIA 16 DE SEPTIEMBRE	16.18	-93.12
8909	CHIS51_2148	241823	(CML269/CML264)/CHIS51_2148	242913	CML269/CML264	SEEDGWAS752	1	LT	LT	96	97	6	2148	MEX	CHIS 51	DZITBA		NA	C			A	J			TERAN	16.45	-93.1
8911	CHIS157_2159	238671	(CML451/CML486)/CHIS157_2159	242916	CML451/CML486	SEEDGWAS2109	2	LT	LT	105	108	3	2159	MEX	CHIS 157			NA	C	F		A	B	J	AMATENANGO DE LA FRONT	POTRERILLO (SUR DE NUEVO ZAPALUTA)	15.62	-92.02
8913	CHIS159_2161	238672	(CML495/CML494)/CHIS159_2161	242919	CML495/CML494	SEEDGWAS2110	2	LT	LT	104	103	3	2161	MEX	CHIS 159	TEHUA9		9	C	F		B	J	A		SANTA ANA SUR DE POTRERILLO	NA	NA
8915	CHIS160_2162	238673	(CML269/CML264)/CHIS160_2162	242913	CML269/CML264	SEEDGWAS2111	1	LT	LT	105	109	3	2162	MEX	CHIS 160	TEHUA9		9	C			A			ZAPOTAL	FINCA PALO GORDO	15.58	-92.05
8916	CHIS165_2163	242336	(CML495/CML494)/CHIS165_2163	242919	CML495/CML494	SEEDGWAS1265	1	LT	LT	92	92	6	2163	MEX	CHIS 165			NA	C			A	B	K		FINCA EL SALVADOR	16.37	-93.06
8917	CHIS168_2164	241190	(CML495/CML494)/CHIS168_2164	242919	CML495/CML494	SEEDGWAS120	2	LT	LT	89	90	6	2164	MEX	CHIS 168	VANDEN	OLOTIL	NA	C			A	J	B		COLONIA ALTAMIRA	15.59	-92.06
8972	SNLP37_2288	241191	(CML269/CML264)/SNLP37_2288	242913	CML269/CML264	SEEDGWAS121	2	LT	LT	82	80	6	2288	MEX	SNLP 37			NA	C			B	J	K		TAMPAMOLON	21.34	-98.47
8994	SNLP124_2296	241824	(CML451/CML486)/SNLP124_2296	242916	CML451/CML486	SEEDGWAS753	2	LT	LT	90	91	6	2296	MEX	SNLP 124	TUXPEN	HARIN8	NA	C			A				SAN VICENTE	21.44	-98.34
9003	SNLP128_2299	241192	(CML269/CML264)/SNLP128_2299	242913	CML269/CML264	SEEDGWAS122	1	LT	LT	87	87	6	2299	MEX	SNLP 128	TUXPEN	OLOTIL	NA	C			A	B	J	TAMAZUNCHALE	RANCHERIA EL SOL	21.16	-98.45
9046	SNLP135_2302	238675	(CML451/CML486)/SNLP135_2302	242916	CML451/CML486	SEEDGWAS2113	2	LT	LT	104	104	3	2302	MEX	SNLP 135	TUXPEN	DZITBA	NA	C			B	A	J	CIUDAD VALLES	SAN FELIPE	22	-99.01
9308	VERA10_2323	238676	(CML495/CML494)/VERA10_2323	242919	CML495/CML494	SEEDGWAS2114	2	LT	LT	100	104	6	2323	MEX	VERA 10			NA	C			A				GUTIERREZ ZAMORA	20.29	-97.06
9346	VERA91_2337	241826	(CML269/CML264)/VERA91_2337	242913	CML269/CML264	SEEDGWAS755	2	LT	LT	89	89	6	2337	MEX	VERA 91	TUXPEN		NA	C			B	J	A	ACTOPAN	ESPERANZA	19.27	-96.34
9353	YUCA125_2354	241827	(CML269/CML264)/YUCA125_2354	242913	CML269/CML264	SEEDGWAS756	2	LT	LT	92	92	6	2354	MEX	YUCA 125	DZITBA		NA	C			A	K	F		PETO	20.08	-88.55
9368	YUCA164_2362	241195	(CML495/CML494)/YUCA164_2362	242919	CML495/CML494	SEEDGWAS125	2	LT	LT	90	90	2	2362	MEX	YUCA 164	DZITBA		NA	C			A	B			TECOH	20.44	-89.29
9398	CUBA105_2371	241828	(CML451/CML486)/CUBA105_2371	242916	CML451/CML486	SEEDGWAS757	1	LT	LT	87	88	6	2371	CUB	CUBA 105	CATSUL8		8	F			B	F		ORIENTE	PALMA SORIANO	20.15	-75.59
9458	CUBA114_2378	241198	(CML269/CML264)/CUBA114_2378	242913	CML269/CML264	SEEDGWAS128	2	LT	LT	78	82	8	2378	CUB	CUBA 114	ARGENT8		8	F			F	J		ORIENTE	VILLA DE LAS TUNAS	20.35	-76
9463	CUBA115_2379	241829	(CML451/CML486)/CUBA115_2379	242916	CML451/CML486	SEEDGWAS758	1	LT	LT	89	87	6	2379	CUB	CUBA 115	TUSON	CUBAAM	NA	C			B			ORIENTE	SAN GERMAN	20.37	-76.07
9469	CUBA116_2380	241830	(CML269/CML264)/CUBA116_2380	242913	CML269/CML264	SEEDGWAS759	2	LT	LT	91	91	6	2380	CUB	CUBA 116	TUSON7		7	C			B			ORIENTE	SAN GERMAN	20.37	-76.07
9482	CUBA119_2382	241831	(CML269/CML264)/CUBA119_2382	242913	CML269/CML264	SEEDGWAS760	2	LT	LT	85	88	6	2382	CUB	CUBA 119	ARGENT8		8	F			B			ORIENTE	PALMA SORIANO	20.15	-75.59
9491	CUBA137_2399	241832	(CML269/CML264)/CUBA137_2399	242913	CML269/CML264	SEEDGWAS761	1	LT	LT	81	80	4	2399	CUB	CUBA 137	TUSON	EARCAR	NA	C	F		B	J		PINAR DEL RIO	VINALES	22.37	-83.42
9502	CUBA142_2404	241199	(CML269/CML264)/CUBA142_2404	242913	CML269/CML264	SEEDGWAS129	2	LT	LT	84	87	6	2404	CUB	CUBA 142	CUBAAM8		8	F			F			HABANA	MAICERA GUINES	22.83	-82.02
9510	CUBA155_2417	241200	(CML269/CML264)/CUBA155_2417	242913	CML269/CML264	SEEDGWAS130	1	LT	LT	80	83	7	2417	CUB	CUBA 155	CUBAAM	FTCUBA	NA	C	F		B	J		LAS VILLAS	AGUADA DE PASAJEROS	22.23	-80.5
9512	CUBA158_2420	241201	(CML269/CML264)/CUBA158_2420	242913	CML269/CML264	SEEDGWAS131	2	LT	LT	83	86	4	2420	CUB	CUBA 158	CUBAAM		NA	C			F			MATANZAS	ALACRANES	23.03	-81.34
9522	CUBA165_2427	241202	(CML269/CML264)/CUBA165_2427	242913	CML269/CML264	SEEDGWAS132	1	LT	LT	81	83	4	2427	CUB	CUBA 165	CUBAAM	FASCIA	NA	C	F		B	J		LAS VILLAS	CENTRAL CARMITA	22.15	-80
9545	CUBA11_2438	241203	(CML269/CML264)/CUBA11_2438	242913	CML269/CML264	SEEDGWAS133	1	LT	LT	83	84	4	2438	CUB	CUBA 11	FTCUBA		NA	F	C		B				PINAR DEL RIO MARKET	22.25	-83.44
9570	CUBA77_2447	241204	(CML269/CML264)/CUBA77_2447	242913	CML269/CML264	SEEDGWAS134	2	LT	LT	82	84	4	2447	CUB	CUBA 77	TUSON7		7	C			B	J		ORIENTE	PEDERNAL HOLGUIN	20.54	-76.15
9603	CUBA80_2448	241205	(CML269/CML264)/CUBA80_2448	242913	CML269/CML264	SEEDGWAS135	1	LT	LT	80	79	4	2448	CUB	CUBA 80	COSTCR	CANILL	NA	C			B	J		ORIENTE	LIMPIO CHIQUITO CACOCUM	20.44	-76.23
9606	CUBA82_2450	241835	(CML269/CML264)/CUBA82_2450	242913	CML269/CML264	SEEDGWAS764	1	LT	LT	89	89	6	2450	CUB	CUBA 82	TUSON	CUBAAM	NA	C	F		B			ORIENTE	FINCA LA VICTORIA JIGUANI	20.23	-76.26
9611	GREN11_2458	241206	(CML495/CML494)/GREN11_2458	242919	CML495/CML494	SEEDGWAS136	1	LT	LT	93	95	6	2458	GRD	GREN 11	CANILL8		8	C	F		B	A	J		ST. PATRICK	12.2	-61.63
9613	HAIT1_2460	241207	(CML495/CML494)/HAIT1_2460	242919	CML495/CML494	SEEDGWAS137	2	LT	LT	94	95	6	2460	HTI	HAIT 1	CHANDE		NA	C			A	B			PETIT-ANGEL-MORON	18.93	-73.08
9676	RDOMGP4_2482	241208	(CML269/CML264)/RDOMGP4_2482	242913	CML269/CML264	SEEDGWAS138	1	LT	LT	85	78	8	2482	DOM	RDOM GP4	CHANDE		NA	C			J	B	I	SANTIAGO	SECCION DE LA CIENAGA	19.3	-71.05
9730	TRIN6_2489	241840	(CML451/CML486)/TRIN6_2489	242916	CML451/CML486	SEEDGWAS769	1	LT	LT	92	94	6	2489	TTO	TRIN 6	TUSON9		9	C	F		B				SAN AGUSTIN	NA	NA
9766	GUAT303_2500	241842	(CML451/CML486)/GUAT303_2500	242916	CML451/CML486	SEEDGWAS771	1	LT	LT	88	90	6	2500	GTM	GUAT 303	SALVAD	TEPECI	NA	C			B			SAN MARCOS	EL RECREO CATARINA	14.57	-91.45
9767	GUAT897_2526	238677	(CML495/CML494)/GUAT897_2526	242919	CML495/CML494	SEEDGWAS2115	2	LT	LT	104	112	8	2526	GTM	GUAT 897			NA	C			A			HUEHUETENANGO	TIERRAS BAJAS NENTON	15.17	-91.26
9769	GUATGP7-1A_2527	242362	(CML269/CML264)/GUATGP7-1A_2527	242913	CML269/CML264	SEEDGWAS1291	2	LT	LT	70	83	8	2527	GTM	GUAT GP7-1A	SALVAD		NA	C			A	B		JUTIAPA	ARGELIA QUEZADA	14.16	-89.53
9770	COLI2_2528	241843	(CML451/CML486)/COLI2_2528	242916	CML451/CML486	SEEDGWAS772	2	LT	LT	88	86	6	2528	MEX	COLI 2			NA	C			A	J	B		TECOMAN	18.57	-103.54
9773	SNLP34_2539	241209	(CML269/CML264)/SNLP34_2539	242913	CML269/CML264	SEEDGWAS139	1	LT	LT	79	77	4	2539	MEX	SNLP 34			NA	C			B	J			COXCATLAN	21.32	-98.53
9777	SNLP56_2540	238678	(CML269/CML264)/SNLP56_2540	242913	CML269/CML264	SEEDGWAS1840	2	LT	LT	94	98	6	2540	MEX	SNLP 56	TUXPEN		NA	C			A				SAN CIRO	21.38	-99.5
9803	VERA146_2554	241212	(CML269/CML264)/VERA146_2554	242913	CML269/CML264	SEEDGWAS142	2	LT	LT	87	88	6	2554	MEX	VERA 146	TUXPEN		NA	C			A	B		TECOLUTLA	BOCA DE LIMA	20.55	-97.13
9856	NICA33_2616	242365	(CML269/CML264)/NICA33_2616	242913	CML269/CML264	SEEDGWAS1294	2	LT	LT	65	64	1	2616	NIC	NICA 33			NA	C	A		A	B		MATAGALPA	UMURE	12.56	-85.53
9858	PARA100_2625	238679	(CML269/CML264)/PARA100_2625	242913	CML269/CML264	SEEDGWAS1841	2	LT	U	106	112	1	2625	PRY	PARA 100	AVMORO9		9	A			B	A		CAAGUAZU	CORONEL OVIEDO	-25.3	-56.3
9860	PARA117_2634	238680	(CML495/CML494)/PARA117_2634	242919	CML495/CML494	SEEDGWAS1842	2	LT	LT	106	105	3	2634	PRY	PARA 117	AVMORO9		9	A			B				ASUNCION(MERCADO)	-25.26	-57.41
9884	BRAZ39_2642	238683	(CML269/CML264)/BRAZ39_2642	242913	CML269/CML264	SEEDGWAS1845	1	LT	LT	89	92	6	2642	BRA	BRAZ 39	AVMORM		NA	A			B	A			RIO GRANDE DO SUL	-29.2	-54.1
9892	BRAZ64_2644	238684	(CML495/CML494)/BRAZ64_2644	242919	CML495/CML494	SEEDGWAS1846	1	LT	LT	102	113	8	2644	BRA	BRAZ 64	AVMORO9		9	A			B	A		MATO GROSSO	DOURADOS	-22.13	-54.48
9957	BRAZ35_2674	238689	(CML269/CML264)/BRAZ35_2674	242913	CML269/CML264	SEEDGWAS1851	2	LT	LT	89	95	6	2674	BRA	BRAZ 35	AVMORO9		9	A			B	K		PARANA	SAN PEDRO DO IVAI	-23.55	-51.52
9958	PARA108_2675	238690	(CML495/CML494)/PARA108_2675	242919	CML495/CML494	SEEDGWAS1852	1	LT	LT	104	108	3	2675	PRY	PARA 108	AVMORO9		9	A			B	D		GUAIRA	COLONIA DOCTOR BOTTRELL(NATALICIO TALAVERA)	-25.46	-56.26
10031	BRAZ207_2685	238692	(CML269/CML264)/BRAZ207_2685	242913	CML269/CML264	SEEDGWAS1854	1	LT	LT	109	114	3	2685	BRA	BRAZ 207	AVMORO9		9	A	F		A			MATO GROSSO	DOURADOS	-22.13,NA	-54.48,NA
10031	BRAZ207_2685	238692	(CML269/CML264)/BRAZ207_2685	242913	CML269/CML264	SEEDGWAS1854	1	LT	LT	109	114	3	2685	BRA	BRAZ 207	AVMORO9		9	A	F		A			MATO GROSSO	DOURADOS	-22.13,NA	-54.48,NA
10068	BRAZ1_2708	238693	(CML495/CML494)/BRAZ1_2708	242919	CML495/CML494	SEEDGWAS1855	1	LT	LT	97	97	6	2708	BRA	BRAZ 1	CAINGA9		9	C	A		A			PARANA	SAN PEDRO DO IVAI	-23.55,-23.33	-51.52,-46.38
10094	BRAZ4_2709	238694	(CML495/CML494)/BRAZ4_2709	242919	CML495/CML494	SEEDGWAS1856	2	LT	LT	97	106	8	2709	BRA	BRAZ 4	CAINGA9		9	A			A	B	J	PARANA	SAN PEDRO DO IVAI	-23.55	-51.52
10101	BRAZ9_2714	238695	(CML269/CML264)/BRAZ9_2714	242913	CML269/CML264	SEEDGWAS1857	2	LT	LT	92	91	6	2714	BRA	BRAZ 9	CAINGA9		9	A			A			PARANA	APUCARANA	-23.33,-23.33	-51.29,-46.38
10108	BRAZ21_2721	238696	(CML269/CML264)/BRAZ21_2721	242913	CML269/CML264	SEEDGWAS1858	2	LT	LT	90	87	6	2721	BRA	BRAZ 21	CAINGA9		9	A			A			PARANA	APUCARANA	-23.33	-51.29
10121	BRAZ30_2724	238697	(CML495/CML494)/BRAZ30_2724	242919	CML495/CML494	SEEDGWAS1859	1	LT	LT	98	100	6	2724	BRA	BRAZ 30	CAINGA9		9	A			A				SAO PAULO	-23.33	-46.38
10282	BRAZ756_2735	238700	(CML269/CML264)/BRAZ756_2735	242913	CML269/CML264	SEEDGWAS1862	1	LT	LT	91	95	6	2735	BRA	BRAZ 756	CAINGA9		9	A			A	K		PARANA		-24	-51
10321	BRAZ2460_2773	241214	(CML269/CML264)/BRAZ2460_2773	242913	CML269/CML264	SEEDGWAS144	2	LT	LT	86	84	6	2773	BRA	BRAZ 2460	AVPICH9		9	F	G		A	B		SAO PAULO	FAZ. ISA ITARRARE	-24.07	-49.2
10325	BRAZ24_2776	238702	(CML495/CML494)/BRAZ24_2776	242919	CML495/CML494	SEEDGWAS1864	1	LT	LT	97	100	6	2776	BRA	BRAZ 24	SYIVAM		NA	F			A			PARANA	SAN PEDRO DO IVAI	-23.55	-51.52
10336	BRAZ2773_2796	241845	(CML451/CML486)/BRAZ2773_2796	242916	CML451/CML486	SEEDGWAS774	1	LT	LT	87	86	6	2796	BRA	BRAZ 2773	AVPICH9		9	F			J	A				NA	NA
10375	BRAZ2802_2825	240216	(CML269/CML264)/BRAZ2802_2825	242913	CML269/CML264	SEEDGWAS3422	1	ST	LT	110	110	1	2825	BRA	BRAZ 2802			NA	F	C		B	K	A			NA	NA
10397	BRAZ2829_2849	241217	(CML269/CML264)/BRAZ2829_2849	242913	CML269/CML264	SEEDGWAS147	1	LT	LT	95	97	6	2849	BRA	BRAZ 2829	AVPIHU9		9	F			A					NA	NA
10547	BRAZ2903_2862	239976	(CML269/CML264)/BRAZ2903_2862	242913	CML269/CML264	SEEDGWAS3182	1	LT	LT	91	NA	NA	2862	BRA	BRAZ 2903			NA	C	F		B	D	J	BAHIA	SANTO ESTEVAM	-12.26	-39.13
10878	BRAZ3000_2952	241220	(CML269/CML264)/BRAZ3000_2952	242913	CML269/CML264	SEEDGWAS150	2	LT	LT	84	83	6	2952	BRA	BRAZ 3000	TUXPEN		NA	C			B	A	J	PARAIBA	POEIRA VERMELHA CA. PATOS	-7.01	-57.16
10909	BRAZ3026_2978	238704	(CML373/CML311)/BRAZ3026_2978	242914	CML373/CML311	SEEDGWAS1866	2	LT	ST	99	100	3	2978	BRA	BRAZ 3026	CATETO		NA	F	C		B	J	A	CEARA	E. AGRONOMIA CA. FORTALEZA	-5	-40
10910	BRAZ3027_2979	238705	(CML495/CML494)/BRAZ3027_2979	242919	CML495/CML494	SEEDGWAS1867	2	LT	LT	95	98	6	2979	BRA	BRAZ 3027	CATETO		NA	F	C		B	A		CEARA	E. AGRONOMIA CA. FORTALEZA	-5	-40
10949	BRAZ3028_2980	238706	(CML269/CML264)/BRAZ3028_2980	242913	CML269/CML264	SEEDGWAS1868	2	LT	LT	92	102	8	2980	BRA	BRAZ 3028	PADENT		NA	C			B	A	J	CEARA	E. AGRONOMIA CA. FORTALEZA	-5	-40
10973	BRAZ3047_2997	239980	(CML269/CML264)/BRAZ3047_2997	242913	CML269/CML264	SEEDGWAS3186	1	LT	LT	108	109	3	2997	BRA	BRAZ 3047			NA	A			B			CEARA	PARADE CA. SENADOR POMPEU	-5.35	-39.22
11004	BRAZ3048_2998	238707	(CML269/CML264)/BRAZ3048_2998	242913	CML269/CML264	SEEDGWAS1869	2	LT	LT	107	108	3	2998	BRA	BRAZ 3048			NA	A			B			CEARA	CATOLE CA. PEDRA BRANCA	-5.27	-39.43
11024	BRAZ3056_3005	239981	(CML269/CML264)/BRAZ3056_3005	242913	CML269/CML264	SEEDGWAS3187	2	LT	LT	108	109	3	3005	BRA	BRAZ 3056			NA	C			B	A	J	CEARA	SANTANA CA. CRATEUS	-5.1	-40.4
11132	SAOPGP7_3060	238711	(CML495/CML494)/SAOPGP7_3060	242919	CML495/CML494	SEEDGWAS1873	1	LT	LT	96	97	6	3060	BRA	SAOP GP7	CATETO9		9	F			F			SAO PAULO		-23.33	-46.38
11153	GUYAGP2_3074	241846	(CML269/CML264)/GUYAGP2_3074	242913	CML269/CML264	SEEDGWAS775	2	LT	LT	95	97	6	3074	GUY	GUYA GP2	NORCAT	CUBAAM	NA	C			B	J			RIO POMEROON	7.06	-58.5
11182	STACGP1_3082	241847	(CML269/CML264)/STACGP1_3082	242913	CML269/CML264	SEEDGWAS776	2	LT	LT	92	92	6	3082	BRA	STAC GP1	DTRGLI9		9	C			B			SANTA CATARINA		-27	-50
11184	MINGGP1_3085	241221	(CML269/CML264)/MINGGP1_3085	242913	CML269/CML264	SEEDGWAS151	2	LT	LT	84	86	4	3085	BRA	MING GP1	PADENT9		9	C			B	A		MINAS GERAIS		-18	-44
11189	RIGSGP12_3088	238715	(CML269/CML264)/RIGSGP12_3088	242913	CML269/CML264	SEEDGWAS1877	2	LT	LT	93	102	8	3088	BRA	RIGS GP12	RGWHDT9		9	C			I	A	D	RIO GRANDE DO SUL		-29.2	-54.1
11194	SAOPGP5_3091	238716	(CML269/CML264)/SAOPGP5_3091	242913	CML269/CML264	SEEDGWAS1878	1	LT	LT	112	119	8	3091	BRA	SAOP GP5	SPWHDT9		9	C			A	B		SAO PAULO		-23.33	-46.38
11281	RIGSGP7_3097	238719	(CML495/CML494)/RIGSGP7_3097	242919	CML495/CML494	SEEDGWAS1881	1	LT	LT	97	105	8	3097	BRA	RIGS GP7	CRAVRG9		9	C			B			RIO GRANDE DO SUL		-29.2	-54.1
11298	RIGSGP8_3098	238720	(CML451/CML486)/RIGSGP8_3098	242916	CML451/CML486	SEEDGWAS1882	2	LT	LT	94	98	6	3098	BRA	RIGS GP8	CRAVRG9		9	C			B			RIO GRANDE DO SUL		-29.2	-54.1
11381	SAOPGP2_3099	238721	(CML495/CML494)/SAOPGP2_3099	242919	CML495/CML494	SEEDGWAS1883	1	LT	LT	101	103	3	3099	BRA	SAOP GP2	CRAVPA9		9	C			B			SAO PAULO		-23.33	-46.38
11423	ATLA328_3194	241849	(CML269/CML264)/ATLA328_3194	242913	CML269/CML264	SEEDGWAS778	1	LT	LT	80	79	4	3194	COL	ATLA 328	COSTEN9		9	F			A	B		ATLANTICO	CAMPO DE LA CRUZ	10.23	-74.23
11489	VERA145_3231	241227	(CML495/CML494)/VERA145_3231	242919	CML495/CML494	SEEDGWAS157	1	LT	LT	90	92	6	3231	MEX	VERA 145	TUXPEN		NA	C			A	B		TECOLUTLA	LA GUADALUPE	20.37	-96.92
11490	VERA148_3233	238722	(CML269/CML264)/VERA148_3233	242913	CML269/CML264	SEEDGWAS1884	1	LT	LT	108	109	3	3233	MEX	VERA 148	TUXPEN	NALTEL	NA	F			K			TECOLUTLA	BOCA DE LIMA	20.55	-97.13
11496	VERA151_3234	241228	(CML269/CML264)/VERA151_3234	242913	CML269/CML264	SEEDGWAS158	1	LT	LT	95	96	6	3234	MEX	VERA 151	TUXPEN		NA	C			B	A	J	PAPANTLA DE OLARTE	EL TRIUNFO	20.28	-97.2
11503	VERA156_3239	241232	(CML269/CML264)/VERA156_3239	242913	CML269/CML264	SEEDGWAS162	1	LT	LT	94	96	6	3239	MEX	VERA 156	TUXPEN		NA	C			A	B	K	PAPANTLA DE OLARTE	BARRIO SAN JUAN,MANUEL AVILA CAMACHO	20.28	-97.2
11505	VERA158_3241	238723	(CML269/CML264)/VERA158_3241	242913	CML269/CML264	SEEDGWAS1885	1	LT	LT	111	114	3	3241	MEX	VERA 158	TUXPEN		NA	C	F		B	A	K	PAPANTLA DE OLARTE	CAMPO TENIXTEPEC	20.57	-97.18
11506	VERA159_3242	241233	(CML495/CML494)/VERA159_3242	242919	CML495/CML494	SEEDGWAS163	1	LT	LT	90	95	6	3242	MEX	VERA 159	TUXPEN		NA	C			A	B	K	PAPANTLA DE OLARTE	CRUZ VERDE	20.28	-97.2
11510	VERA164_3245	241234	(CML495/CML494)/VERA164_3245	242919	CML495/CML494	SEEDGWAS164	1	LT	LT	103	103	3	3245	MEX	VERA 164	TUXPEN		NA	C			A	B		PAPANTLA DE OLARTE	TALAXCA DONATO MARQUEZ	20.32	-97.2
11549	VERA175_3253	241237	(CML269/CML264)/VERA175_3253	242913	CML269/CML264	SEEDGWAS167	1	LT	LT	96	99	6	3253	MEX	VERA 175	TUXPEN	TEPECI	NA	C			A	B	I	ALAMO	PALO BLANCO	20.56	-97.45
11553	VERA176_3254	238725	(CML451/CML486)/VERA176_3254	242916	CML451/CML486	SEEDGWAS1887	1	LT	LT	94	98	6	3254	MEX	VERA 176	TUXPEN	NALTEL	NA	C			B	J	A	ALAMO	PALO BLANCO	20.56	-97.45
11558	VERA178_3256	241238	(CML269/CML264)/VERA178_3256	242913	CML269/CML264	SEEDGWAS168	1	LT	LT	96	95	6	3256	MEX	VERA 178	TUXPEN	NALTEL	NA	C			A	B	J	ALAMO	SAN ANTONIO	20.56	-97.43
11560	VERA184_3258	241851	(CML451/CML486)/VERA184_3258	242916	CML451/CML486	SEEDGWAS780	1	LT	LT	92	95	6	3258	MEX	VERA 184	TEPECI		NA	C			B	A	J	TUXPAN	RANCHO KILOMETRO 16 OJITE	20.58	-97.32
11618	VERA193_3261	241240	(CML269/CML264)/VERA193_3261	242913	CML269/CML264	SEEDGWAS170	2	LT	LT	96	93	6	3261	MEX	VERA 193	TEPECI	TUXPEN	NA	C			B	A	D		CONGREGACION OCAMPO	21.23	-97.5
11628	VERA195_3263	241241	(CML269/CML264)/VERA195_3263	242913	CML269/CML264	SEEDGWAS171	1	LT	LT	97	96	6	3263	MEX	VERA 195	TUXPEN		NA	C			B	A	J	TAMIAHUA	TAMPACHE LAS FLORES	21.17	-97.31
11630	VERA202_3267	241242	(CML269/CML264)/VERA202_3267	242913	CML269/CML264	SEEDGWAS172	2	LT	LT	89	90	6	3267	MEX	VERA 202	TUXPEN	TEPECI	NA	C			A	B	J		TEPETZINTLA	21.09	-97.51
11635	VERA203_3268	241243	(CML269/CML264)/VERA203_3268	242913	CML269/CML264	SEEDGWAS173	2	LT	LT	92	96	6	3268	MEX	VERA 203	TUXPEN		NA	C			A	B	J	CHINAMPA DE GOROSTIZA	SAN ANTONIO	21.21	-97.43
11673	VERA204_3269	238726	(CML269/CML264)/VERA204_3269	242913	CML269/CML264	SEEDGWAS1888	1	LT	LT	108	109	3	3269	MEX	VERA 204	TUXPEN	NALTEL	NA	C			B	A	K		SAN ANTONIO CHINAMPA	NA	NA
11675	VERA207_3271	241244	(CML269/CML264)/VERA207_3271	242913	CML269/CML264	SEEDGWAS174	2	LT	LT	94	95	6	3271	MEX	VERA 207	TEPECI	TUXPEN	NA	C			B	A			SAN BARTOLO/HOY CARMONA VALLE	21.35	-97.79
11700	VERA216_3275	241853	(CML269/CML264)/VERA216_3275	242913	CML269/CML264	SEEDGWAS782	1	LT	LT	91	94	6	3275	MEX	VERA 216	TUXPEN	TEPECI	NA	C			A	K	B		LA "Y" GRIEGA TEMPORAL	21.31	-98.23
11702	VERA217_3276	241246	(CML495/CML494)/VERA217_3276	242919	CML495/CML494	SEEDGWAS176	2	LT	LT	90	86	6	3276	MEX	VERA 217	TUXPEN	OLOTIL	NA	C			B	A	K		LA "Y" GRIEGA TEMPORAL	21.31	-98.23
11706	VERA219_3277	241247	(CML495/CML494)/VERA219_3277	242919	CML495/CML494	SEEDGWAS177	1	LT	LT	87	90	6	3277	MEX	VERA 219	TEPECI		NA	C			A	B	K		TAMPICO ALTO	22.11	-97.8
11716	VERA220_3278	241854	(CML269/CML264)/VERA220_3278	242913	CML269/CML264	SEEDGWAS783	1	LT	LT	93	90	6	3278	MEX	VERA 220	TEPECI		NA	C			A	B			CHOTE GRANDE OZULUAMA	21.4	-97.5
11732	CRIC55_3294	241855	(CML451/CML486)/CRIC55_3294	242916	CML451/CML486	SEEDGWAS784	2	LT	LT	88	87	6	3294	CRI	CRIC 55	OLOTON		NA	F			A	B		SAN JOSE	REPUNTA LOS ANGELES PEREZ ZELEDON	9.56	-84.05
11741	CRIC78_3309	241857	(CML269/CML264)/CRIC78_3309	242913	CML269/CML264	SEEDGWAS786	1	LT	LT	89	90	6	3309	CRI	CRIC 78	SALVAD8		8	C	F		B	J	A	PUERTO LIMON	LA BOMBA RAMAL ESTRELLA	9.59	-83.02
11751	CRIC79_3310	241249	(CML269/CML264)/CRIC79_3310	242913	CML269/CML264	SEEDGWAS179	2	LT	LT	83	83	4	3310	CRI	CRIC 79	CLAVIL8		8	F	C		B	A		PUERTO LIMON	PENHURST LINEA ESTRELLA	9.59	-83.02
11761	CRIC81_3312	241858	(CML269/CML264)/CRIC81_3312	242913	CML269/CML264	SEEDGWAS787	2	LT	LT	87	88	6	3312	CRI	CRIC 81	SALVAD	CLAVIL	NA	C	F		B	J	A	PUERTO LIMON	LA CABANA PLAYADES LINEA ESTRELLA	9.59	-83.02
11766	CRIC83_3314	241859	(CML451/CML486)/CRIC83_3314	242916	CML451/CML486	SEEDGWAS788	1	LT	LT	89	88	6	3314	CRI	CRIC 83	NALTEL	OLOTON	NA	F	C		A	B	K	PUERTO LIMON	DONDONIA LINEA ESTRELLA	9.59	-83.02
11778	CRIC85_3316	241250	(CML269/CML264)/CRIC85_3316	242913	CML269/CML264	SEEDGWAS180	1	LT	LT	80	83	7	3316	CRI	CRIC 85	NALTEL	OLOTON	NA	C	F		A			ALAJUELA	LAS DELICIAS SAN CARLOS	10.3,10.3	-84.3,-84.3
11782	CRIC87_3318	241860	(CML451/CML486)/CRIC87_3318	242916	CML451/CML486	SEEDGWAS789	2	LT	LT	90	88	6	3318	CRI	CRIC 87	CLAVIL	OLOTON	NA	F	C		A	B		ALAJUELA	LOS CHILES SAN CARLOS	11.01	-84.44
11783	CRIC91_3321	241861	(CML451/CML486)/CRIC91_3321	242916	CML451/CML486	SEEDGWAS790	2	LT	LT	92	86	8	3321	CRI	CRIC 91	OLOTON	NALTEL	NA	C	F		B	J		ALAJUELA	VENECIA SAN CARLOS	10.2	-84.17
11804	CRIC128_3351	241252	(CML269/CML264)/CRIC128_3351	242913	CML269/CML264	SEEDGWAS182	2	LT	LT	83	83	4	3351	CRI	CRIC 128	SALVAD		NA	C			A	B		ALAJUELA	FLORENCIA SAN CARLOS	10.3	-84.3
11816	CRIC131_3353	238727	(CML495/CML494)/CRIC131_3353	242919	CML495/CML494	SEEDGWAS1889	1	LT	LT	95	108	8	3353	CRI	CRIC 131	SALVAD	CLAVIL	NA	C	F		B	J	A	ALAJUELA	QUEBRADA AZUL SAN CARLOS	10.3	-84.3
11907	CRIC197_3405	241255	(CML269/CML264)/CRIC197_3405	242913	CML269/CML264	SEEDGWAS185	2	LT	LT	67	86	8	3405	CRI	CRIC 197	TEPECI	OLOTON	NA	C	F		A	B		GUANACASTE	QUEBRADA GRANDE TILARAN	10.26	-85
11997	CRIC221_3422	242394	(CML269/CML264)/CRIC221_3422	242913	CML269/CML264	SEEDGWAS1323	1	LT	LT	71	76	8	3422	CRI	CRIC 221	CLAVIL	NALTEL	NA	F	C		A	I	K	GUANACASTE	COLPACHI PENAS BLANCAS	10.3	-85.15
12010	CRIC285_3475	241257	(CML269/CML264)/CRIC285_3475	242913	CML269/CML264	SEEDGWAS187	2	LT	LT	82	82	4	3475	CRI	CRIC 285	CLAVIL	SALVAD	NA	F			A			GUANACASTE	CAIMITAL NICOYA	10.07	-85.27
12020	CRIC297_3485	241260	(CML495/CML494)/CRIC297_3485	242919	CML495/CML494	SEEDGWAS190	1	LT	LT	93	94	6	3485	CRI	CRIC 297	OLOTON	SALVAD	NA	C	F		B	A	I	PUNTARENAS	BAJO DE PLATANAS BUENOS AIRES	9.09	-83.2
12023	CRIC299_3486	242173	(CML373/CML311)/CRIC299_3486	242914	CML373/CML311	SEEDGWAS1102	1	ST	ST	80	87	2	3486	CRI	CRIC 299	OLOTON	SALVAD	NA	C	F		B	A		PUNTARENAS	SAN RAFAEL SABALITO	9	-83.15
12038	CRIC303_3489	241261	(CML269/CML264)/CRIC303_3489	242913	CML269/CML264	SEEDGWAS191	1	LT	LT	80	87	8	3489	CRI	CRIC 303	SALVAD		NA	C	F		A	B	J	PUNTARENAS	SABALITO CANAS GORDAS	9	-83.15
12048	CRIC316_3499	242401	(CML495/CML494)/CRIC316_3499	242919	CML495/CML494	SEEDGWAS1330	2	LT	LT	87	88	6	3499	CRI	CRIC 316	SALVAD	OLOTON	NA	F	C		A	B	J	PUNTARENAS	RIO NUEVO PUERTO JIMENEZ	8.33	-83.19
12068	CRIC320_3502	241865	(CML451/CML486)/CRIC320_3502	242916	CML451/CML486	SEEDGWAS794	2	LT	LT	88	90	6	3502	CRI	CRIC 320	OLOTON		NA	F	C		B	A		PUNTARENAS	BOCA RIO TIGRE PUERTO JIMENEZ	8.33	-83.19
12071	CRIC336_3515	241263	(CML269/CML264)/CRIC336_3515	242913	CML269/CML264	SEEDGWAS193	1	LT	LT	79	82	8	3515	CRI	CRIC 336	SALVAD	OLOTON	NA	C	F		A	B	J	SAN JOSE	SAN JUAN PURISCAL	9.56	-84.05
12075	CRIC341_3520	241866	(CML269/CML264)/CRIC341_3520	242913	CML269/CML264	SEEDGWAS795	2	LT	LT	80	81	4	3520	CRI	CRIC 341	CLAVIL	SALVAD	NA	F	C		A	B	D	SAN JOSE	CARIT PURISCAL	9.56	-84.05
12146	CRIC393_3563	241867	(CML269/CML264)/CRIC393_3563	242913	CML269/CML264	SEEDGWAS796	2	LT	LT	70	70	1	3563	CRI	CRIC 393	SALVAD	OLOTON	NA	F	C		B	J	A	GUANACASTE	QUIRIMAN NICOYA	10.07	-85.27
12332	SALV49_3607	242406	(CML269/CML264)/SALV49_3607	242913	CML269/CML264	SEEDGWAS1335	2	LT	LT	64	66	8	3607	SLV	SALV 49	SALVAD		NA	C	F		A	B	J		HACIENDA SUNZA SONSONATE	13.42	-89.47
12337	SALV50_3608	242407	(CML269/CML264)/SALV50_3608	242913	CML269/CML264	SEEDGWAS1336	2	LT	LT	69	69	1	3608	SLV	SALV 50	SALVAD	NALTE8	NA	C	F		A	J			HACIENDA SUNZA SONSONATE	13.42	-89.47
12351	SALV60_3613	241871	(CML269/CML264)/SALV60_3613	242913	CML269/CML264	SEEDGWAS800	2	LT	LT	77	77	4	3613	SLV	SALV 60	SALVAD	NTBLTB	NA	C	F		A	J	B		COLONIA METALIO	13.8	-88.91
12354	SALV62_3615	241872	(CML269/CML264)/SALV62_3615	242913	CML269/CML264	SEEDGWAS801	1	LT	LT	74	76	1	3615	SLV	SALV 62	TEPECI	NALTEL	NA	C	F		A	J			HACIENDA IZUNZA	13.8	-88.91
12355	SALV66_3617	242411	(CML269/CML264)/SALV66_3617	242913	CML269/CML264	SEEDGWAS1340	1	LT	LT	67	68	1	3617	SLV	SALV 66	SALVAD	NALTEL	NA	C			A			SAN VICENTE	SANTA CRUZ PARILLO	13.37	-88.46
12363	SALV72_3621	242413	(CML269/CML264)/SALV72_3621	242913	CML269/CML264	SEEDGWAS1342	2	LT	LT	69	70	1	3621	SLV	SALV 72	NALTEL	SALVAD	NA	C			A			USULUTAN	CATUCO LA UNION	13.2	-87.51
12403	SALV82_3628	241266	(CML269/CML264)/SALV82_3628	242913	CML269/CML264	SEEDGWAS196	2	LT	LT	79	81	4	3628	SLV	SALV 82	SALVAD	DZITBA	NA	C			A	B	J	CHALATENANGO	CASERIO EL LIMON	14.03	-88.53
12458	SALV90_3634	241267	(CML269/CML264)/SALV90_3634	242913	CML269/CML264	SEEDGWAS197	1	LT	LT	82	83	4	3634	SLV	SALV 90	SALVAD	NALTEL	NA	C			A	J	B	CHALATENANGO	CITALA	14.03	-88.53
12472	SALV102_3642	242419	(CML269/CML264)/SALV102_3642	242913	CML269/CML264	SEEDGWAS1348	1	LT	LT	68	68	1	3642	SLV	SALV 102	SALVAD	NALTEL	NA	C			A	B	J	FRANCISCO MORAZAN	CANTON EL TRIUNFO	13.27	-88.55
12548	HOND123_3702	241874	(CML451/CML486)/HOND123_3702	242916	CML451/CML486	SEEDGWAS803	2	LT	LT	89	87	6	3702	HND	HOND 123	SALVAD	CLAVIL	NA	C	F		A	B	J	CORTES	RIO LINDO	15.3	-88
12613	PANA66_3783	241875	(CML451/CML486)/PANA66_3783	242916	CML451/CML486	SEEDGWAS804	1	LT	LT	89	87	6	3783	PAN	PANA 66	SALVAD7		7	F	C		B	F	K	COCLE	NATA AGUA DULCE	8.25	-80.55
12615	PANA72_3786	239983	(CML269/CML264)/PANA72_3786	242913	CML269/CML264	SEEDGWAS3189	1	LT	LT	91	94	6	3786	PAN	PANA 72	CLAVIL7		7	F	C		B	A		CHIRIQUI	LA UNION ASERIO	8.3	-82.11
12625	PANA78_3790	241876	(CML269/CML264)/PANA78_3790	242913	CML269/CML264	SEEDGWAS805	1	LT	LT	90	87	6	3790	PAN	PANA 78	SALVAD	CLAVIL	NA	C	F		B	A	J	CHIRIQUI	SANTA CRUZ SAN ANDRES	8.35	-82.43
12626	PANA79_3791	241877	(CML269/CML264)/PANA79_3791	242913	CML269/CML264	SEEDGWAS806	2	LT	LT	80	82	4	3791	PAN	PANA 79	SALVAD	CLAVIL	NA	F	C		B	D		CHIRIQUI	BAITUM SAN ANDRES	8.35	-82.43
12633	PANA85_3795	238728	(CML451/CML486)/PANA85_3795	242916	CML451/CML486	SEEDGWAS1890	2	LT	LT	94	100	6	3795	PAN	PANA 85	SALVAD	TEPECI	NA	C	F		B	I	A	CHIRIQUI	JACU	8.3	-82.11
12645	PANA93_3801	241272	(CML495/CML494)/PANA93_3801	242919	CML495/CML494	SEEDGWAS202	2	LT	LT	96	94	6	3801	PAN	PANA 93	CHOCOC		NA	A			I	B	A	PANAMA	MAJE RESERVA INDIGENA CHEPO	9.1	-79.06
12681	PANA109_3809	241879	(CML451/CML486)/PANA109_3809	242916	CML451/CML486	SEEDGWAS808	2	LT	LT	90	89	2	3809	PAN	PANA 109	CHOCOC		NA	A	F		B	I	K	PANAMA	IPETI RESERVA INDIGENA CHEPO	9.1	-79.06
12731	PANA120_3814	239986	(CML269/CML264)/PANA120_3814	242913	CML269/CML264	SEEDGWAS3192	2	LT	LT	91	92	6	3814	PAN	PANA 120	CLAVIL	SALVAD	NA	F	C		B	A	J	CHIRIQUI	EL BOUGO BUGABA CONCEPCION	8.31	-82.37
12743	PANA139_3826	241277	(CML269/CML264)/PANA139_3826	242913	CML269/CML264	SEEDGWAS207	1	LT	LT	81	80	4	3826	PAN	PANA 139	SALVAD	NALTEL	NA	F	C		B	J	A	LOS SANTOS	LA HONDA	7.55	-80.25
12753	PANA142_3829	242439	(CML495/CML494)/PANA142_3829	242919	CML495/CML494	SEEDGWAS1368	2	LT	LT	89	84	6	3829	PAN	PANA 142	SALVAD	NALTEL	NA	F			B	I		PANAMA	MAJE CHEPO	9.1	-79.06
12764	PANA151_3835	241880	(CML451/CML486)/PANA151_3835	242916	CML451/CML486	SEEDGWAS809	1	LT	LT	90	90	2	3835	PAN	PANA 151	SALVAD	CLAVIL	NA	F	C		B	A		PANAMA	CAPIRA	8.45	-79.53
12767	PANA153_3837	241278	(CML269/CML264)/PANA153_3837	242913	CML269/CML264	SEEDGWAS208	1	LT	LT	83	82	4	3837	PAN	PANA 153	SALVAD	CUBAAM	NA	F	C		B	J		PANAMA	CABUYA CHAME	8.58	-79.91
12816	PANA177_3853	242863	(CML373/CML311)/PANA177_3853	242914	CML373/CML311	SEEDGWAS1792	1	ST	ST	80	82	2	3853	PAN	PANA 177	SALVAD	NALTEL	NA	F	C		B	A	J	CHIRIQUI	RABO DE PUERCO SAN JUAN	8.3	-82.11
12831	ANTI5_3859	241881	(CML451/CML486)/ANTI5_3859	242916	CML451/CML486	SEEDGWAS810	1	LT	LT	89	88	6	3859	ATG	ANTI 5			NA	F	C		B	J		ST. PHILIP	WALDRONS (WATSONS)	NA	NA
12889	CUBA90_3874	241883	(CML451/CML486)/CUBA90_3874	242916	CML451/CML486	SEEDGWAS812	1	LT	LT	88	90	6	3874	CUB	CUBA 90	CHANDE	EARCAR	NA	C			B	J		ORIENTE	ALMACEN DE QUINONES CONTRAMAESTRE	20.18	-76.13
12900	CUBA95_3876	241280	(CML269/CML264)/CUBA95_3876	242913	CML269/CML264	SEEDGWAS210	1	LT	LT	83	80	6	3876	CUB	CUBA 95	CHANDE		NA	C			B	J		ORIENTE	ALMACEN DE QUINONES CONTRAMAESTRE	20.18	-76.13
12918	GUAD13_3889	241284	(CML269/CML264)/GUAD13_3889	242913	CML269/CML264	SEEDGWAS214	1	LT	LT	87	89	6	3889	GLP	GUAD 13	COSTCR	EARCAR	NA	F	C		J	B			LAMENTIN	16.26	-61.61
12928	GUAD16_3891	241285	(CML269/CML264)/GUAD16_3891	242913	CML269/CML264	SEEDGWAS215	1	LT	LT	82	81	4	3891	GLP	GUAD 16	CUBAAM	TUSON	NA	C	F		B	J			BAIE MAHAULT	16.26	-61.58
12936	HAIT19_3894	241885	(CML269/CML264)/HAIT19_3894	242913	CML269/CML264	SEEDGWAS814	1	LT	LT	95	95	6	3894	HTI	HAIT 19	HAITYE7		7	C	F		B	A	J	SAN MARC	VERRETES	19.07	-72.42
12939	HAIT24_3896	241886	(CML451/CML486)/HAIT24_3896	242916	CML451/CML486	SEEDGWAS815	1	LT	LT	90	86	6	3896	HTI	HAIT 24	HAITYE	EARCAR	NA	C	F		B	J	A	GONAIVES	BASSIN-BLEUE	18.84	-73.09
12940	HAIT25_3897	241887	(CML269/CML264)/HAIT25_3897	242913	CML269/CML264	SEEDGWAS816	1	LT	LT	95	96	6	3897	HTI	HAIT 25	HAITYE	COSTCR	NA	C	F		B	A		GONAIVES	GROS-MORNE	18.84	-73.07
12949	HAIT27_3899	241286	(CML269/CML264)/HAIT27_3899	242913	CML269/CML264	SEEDGWAS216	1	LT	LT	96	97	6	3899	HTI	HAIT 27	HAITYE8		8	C	F		B	K	I	MARMELADE-ARTIBONITE	PRUDENCE	19.51	-72.35
12964	HAIT31_3901	241888	(CML451/CML486)/HAIT31_3901	242916	CML451/CML486	SEEDGWAS817	2	LT	LT	97	99	6	3901	HTI	HAIT 31	HAITYE8		8	C			B	A	D		BOIS D' HOMME	18.85	-73.09
12966	HAIT35_3904	241889	(CML451/CML486)/HAIT35_3904	242916	CML451/CML486	SEEDGWAS818	1	LT	LT	102	104	3	3904	HTI	HAIT 35	HAITYE	EARCAR	NA	C			J	B	D	MIRAGOANE	FONDS-DES-NEGRES	18.85	-73.08
12970	HAIT40_3905	241890	(CML269/CML264)/HAIT40_3905	242913	CML269/CML264	SEEDGWAS819	1	LT	LT	97	97	6	3905	HTI	HAIT 40	EARCAR	HAITYE	NA	C	F		B	J	A	DISTRICTO JEREMIE	MORON-LAFERME	19.6	-72.71
12974	HAIT43_3906	242454	(CML495/CML494)/HAIT43_3906	242919	CML495/CML494	SEEDGWAS1383	2	LT	LT	94	96	6	3906	HTI	HAIT 43	HAITYE	EARCAR	NA	C	F		B	J	A	PLAN-DES-CALLES	LA BORDE	18.84	-73.06
12977	HAIT44_3907	241288	(CML269/CML264)/HAIT44_3907	242913	CML269/CML264	SEEDGWAS218	1	LT	LT	96	97	6	3907	HTI	HAIT 44	HAITWH		NA	F	C		A	B	J	PLAN-DES-CALLES	LA BORDE	18.84	-73.06
12979	HAIT45_3908	241289	(CML269/CML264)/HAIT45_3908	242913	CML269/CML264	SEEDGWAS219	1	LT	LT	94	95	6	3908	HTI	HAIT 45	HAITYE	EARCAR	NA	C	F		B	J	A	PLAN-DES-CALLES	LABORDE	18.85	-73.09
12981	JAMA10_3910	242456	(CML495/CML494)/JAMA10_3910	242919	CML495/CML494	SEEDGWAS1385	2	LT	LT	87	88	6	3910	JAM	JAMA 10	TUSON	CUBAAM	NA	C	F		B			TRELAWNY	LUCKY HILL FARMING	18.38	-77.63
12983	PUER3_3911	241891	(CML451/CML486)/PUER3_3911	242916	CML451/CML486	SEEDGWAS820	1	LT	LT	89	90	6	3911	PRI	PUER 3	STCROI8		8	C			B	J	A		QUEBRADILLA	18.28	-66.57
12989	PARA132_3923	238729	(CML451/CML486)/PARA132_3923	242916	CML451/CML486	SEEDGWAS1891	2	LT	LT	104	106	3	3923	PRY	PARA 132	PEROLA		NA	F			A	B		MISIONES	COLONIA SAN IGNACIO	-26.43	-57
12992	RDOM243_3929	241893	(CML269/CML264)/RDOM243_3929	242913	CML269/CML264	SEEDGWAS822	2	LT	LT	81	81	4	3929	DOM	RDOM 243	TUXPEN	CANILL	NA	C			B	J		EL SEIBO	COLONIA PEDRO SANCHEZ	18.45	-69.05
13001	RDOM249_3934	241895	(CML269/CML264)/RDOM249_3934	242913	CML269/CML264	SEEDGWAS824	2	LT	LT	85	83	6	3934	DOM	RDOM 249	TUXPEN		NA	C			B	J		LA VEGA	FINCA JUMA 2 KILOMETROS SUR DE BANAO	19.11	-70.3
13012	RDOM250_3935	241896	(CML451/CML486)/RDOM250_3935	242916	CML451/CML486	SEEDGWAS825	1	LT	LT	90	90	2	3935	DOM	RDOM 250	TUXPEN	CANILL	NA	C			B	J		LA VEGA	FINCA JUMA 2 KILOMETROS SUR DE BANAO	19.11	-70.3
13021	RDOM264_3946	241897	(CML451/CML486)/RDOM264_3946	242916	CML451/CML486	SEEDGWAS826	1	LT	LT	96	94	6	3946	DOM	RDOM 264	CANILL	VANDEN	NA	C			B	J	D	MT SAN	ABREU 6 KILOMETROS NOROESTE DE CABRERA	18.7	-70.16
13033	RDOM276_3951	241293	(CML269/CML264)/RDOM276_3951	242913	CML269/CML264	SEEDGWAS223	1	LT	LT	90	90	2	3951	DOM	RDOM 276	VANDEN	CANILL	NA	C			B	J	F	SANTIAGO	LICEY PENA OESTE DE MOCA	19.3	-71.05
13054	RDOM289_3959	241898	(CML451/CML486)/RDOM289_3959	242916	CML451/CML486	SEEDGWAS827	1	LT	LT	88	87	6	3959	DOM	RDOM 289	VANDEN	CANILL	NA	C			B	J	D	SAN CRISTOBAL	MONTE PLATA LOTE LA ESTANCIA	18.25	-70.06
13059	RDOM301_3967	241295	(CML269/CML264)/RDOM301_3967	242913	CML269/CML264	SEEDGWAS225	1	LT	LT	79	75	6	3967	DOM	RDOM 301	VANDEN	CANILL	NA	C			B	J	D		AZUA	18.26,19	-70.44,-70.67
13084	TOBA15_3991	241297	(CML269/CML264)/TOBA15_3991	242913	CML269/CML264	SEEDGWAS227	1	LT	LT	92	94	6	3991	TTO	TOBA 15	TUSON	COSTCR	NA	C			B	J	A		ROXBOROUGH	11.25	-60.58
13087	TRIN19_3993	242466	(CML495/CML494)/TRIN19_3993	242919	CML495/CML494	SEEDGWAS1395	2	LT	LT	86	93	8	3993	TTO	TRIN 19	TUSON8		8	C			B			ST. AGUSTINE	CA. IMPERIAL COLLEGE OF AGRICULTURE	10.65	-61.4
13103	TRIN24_3996	241903	(CML269/CML264)/TRIN24_3996	242913	CML269/CML264	SEEDGWAS832	1	LT	LT	95	91	6	3996	TTO	TRIN 24	TUSON	CANILL	NA	C			F	J		CA. SAN FERNANDO	HERMITAGE	10.16	-61.27
13109	TRIN30_4001	242469	(CML451/CML486)/TRIN30_4001	242916	CML451/CML486	SEEDGWAS1398	2	LT	LT	93	94	6	4001	TTO	TRIN 30	TUSON	CANILL	NA	C			F	J	A	CA. SANGRE GRANDE	FISHING POND	10.36	-61.03
13111	TRIN35_4003	241904	(CML269/CML264)/TRIN35_4003	242913	CML269/CML264	SEEDGWAS833	1	LT	LT	93	94	6	4003	TTO	TRIN 35	TUSON	CANILL	NA	C			F	K	A	ST. CLAIR	AROUCA	10.37	-61.21
13123	TRIN39_4007	242471	(CML495/CML494)/TRIN39_4007	242919	CML495/CML494	SEEDGWAS1400	1	LT	LT	95	95	6	4007	TTO	TRIN 39	TUSON	PUYA	NA	C			F	A		SANTA CRUZ	LA PASTORA	10.71	-61.46
13124	TRIN40_4008	241298	(CML269/CML264)/TRIN40_4008	242913	CML269/CML264	SEEDGWAS228	1	LT	LT	95	96	6	4008	TTO	TRIN 40	PUYA6		6	C			B	J		SANTA CRUZ	CANTARO VILLAGE HOLOLO	10.7	-61.46
13129	TRIN45_4012	242472	(CML495/CML494)/TRIN45_4012	242919	CML495/CML494	SEEDGWAS1401	1	LT	LT	92	94	6	4012	TTO	TRIN 45	PUYA7		7	C			B	A		CARONI	BRAZIL	10.3	-61.15
13130	TRIN46_4013	242473	(CML495/CML494)/TRIN46_4013	242919	CML495/CML494	SEEDGWAS1402	2	LT	LT	92	95	6	4013	TTO	TRIN 46	PUYA7		7	C			B	J		ST. ANDREW	TAMANA	10.3	-61.15
13131	TRIN47_4014	242474	(CML495/CML494)/TRIN47_4014	242919	CML495/CML494	SEEDGWAS1403	1	LT	LT	87	86	6	4014	TTO	TRIN 47	PUYA7		7	C			B			ST. ANDREW	TAMANA	10.3	-61.15
13132	TRIN48_4015	242475	(CML495/CML494)/TRIN48_4015	242919	CML495/CML494	SEEDGWAS1404	1	LT	LT	92	95	6	4015	TTO	TRIN 48	CHANDE7		7	C			B	A		ST. ANDREW	TAMANA	10.3	-61.15
13133	TRIN49_4016	241299	(CML495/CML494)/TRIN49_4016	242919	CML495/CML494	SEEDGWAS229	1	LT	LT	90	93	6	4016	TTO	TRIN 49	TUSON	CHANDE	NA	C	F		B	J	A	CARONI	GUANAPO	10.36	-61.16
13136	TRIN50_4017	241300	(CML269/CML264)/TRIN50_4017	242913	CML269/CML264	SEEDGWAS230	1	LT	LT	97	94	6	4017	TTO	TRIN 50	PUYA7		7	C			F	J		VICTORIA	PRINCES TOWN	10.17	-61.24
13149	COMPUESTOHONDURENO1_4023	238730	(CML269/CML264)/COMPUESTOHONDURENO1_4023	242913	CML269/CML264	SEEDGWAS1892	2	LT	LT	89	88	6	4023	HND	COMPUESTO HONDURENO 1			NA	C			B	J	D		COMAYAGUA	14.3	-87.4
13801	BOLONBACAL_4047	239200	(CML373/CML311)/BOLONBACAL_4047	242914	CML373/CML311	SEEDGWAS2406	2	ST	ST	100	109	5	4047	MEX	BOLON BACAL	MEZCLA	TEPECI	NA	C			A					NA	NA
13813	BRAZ229_4081	238732	(CML495/CML494)/BRAZ229_4081	242919	CML495/CML494	SEEDGWAS1894	1	LT	LT	95	100	6	4081	BRA	BRAZ 229	PADENT		NA	C			B	A		PERNAMBUCO	GARANHUNS	-8.53,NA	-36.3,NA
13897	GUYA814_4103	241305	(CML495/CML494)/GUYA814_4103	242919	CML495/CML494	SEEDGWAS235	2	LT	LT	90	90	2	4103	GUY	GUYA 814	NORCAT	FASCIA	NA	C			F				RIO POMEROON	7.06	-58.5
13955	BRAZ3_4107	238733	(CML451/CML486)/BRAZ3_4107	242916	CML451/CML486	SEEDGWAS1895	1	LT	LT	93	94	6	4107	BRA	BRAZ 3	CAINGA		NA	A			A	J		PARANA	SAN PEDRO DO IVAI	-23.55	-51.52
13968	PARA107_4121	238737	(CML269/CML264)/PARA107_4121	242913	CML269/CML264	SEEDGWAS1899	2	LT	LT	106	109	3	4121	PRY	PARA 107	AVMORO		NA	A			B	D	A	GUAIRA	COLONIA DOCTOR BOTTRELL	-25.46	-56.26
13997	PARA119_4123	238738	(CML269/CML264)/PARA119_4123	242913	CML269/CML264	SEEDGWAS1900	1	LT	LT	88	90	6	4123	PRY	PARA 119	AVMORO9		9	A			B	A		MISIONES		-27	-57
14071	PARA148_4143	239989	(CML269/CML264)/PARA148_4143	242913	CML269/CML264	SEEDGWAS3195	1	LT	LT	106	NA	NA	4143	PRY	PARA 148	CRPYPA		NA	F			A	B		MISIONES	COLONIA SAN IGNACIO	-26.43	-57
14154	BRAZ230_4182	238743	(CML495/CML494)/BRAZ230_4182	242919	CML495/CML494	SEEDGWAS1905	2	LT	LT	98	108	8	4182	BRA	BRAZ 230	PADENT		NA	C			B	A	J	PERNAMBUCO	BEZERROS VILLA ENCRUZILH	-8.15	-35.35
14170	BRAZ358_4198	238745	(CML269/CML264)/BRAZ358_4198	242913	CML269/CML264	SEEDGWAS1907	1	LT	LT	109	112	3	4198	BRA	BRAZ 358	PADENT		NA	F	C		A	B		SAO PAULO	CACONDE	-21.33	-46.38
14171	BRAZ362_4200	238746	(CML269/CML264)/BRAZ362_4200	242913	CML269/CML264	SEEDGWAS1908	2	LT	LT	109	112	3	4200	BRA	BRAZ 362	PADENT		NA	C	F		B			SAO PAULO	UCHOA	-20.58	-49.09
14173	BRAZ420_4219	238747	(CML495/CML494)/BRAZ420_4219	242919	CML495/CML494	SEEDGWAS1909	1	LT	LT	98	100	6	4219	BRA	BRAZ 420	PADENT		NA	F	C		B	A		SAO PAULO	CAPAO BONITO	-24	-48.18
14174	BRAZ429_4223	238748	(CML495/CML494)/BRAZ429_4223	242919	CML495/CML494	SEEDGWAS1910	2	LT	LT	102	105	3	4223	BRA	BRAZ 429	PADENT		NA	C	F		B			SAO PAULO	OURINHOS	-22.58	-49.5
14188	URUG598_4254	238749	(CML495/CML494)/URUG598_4254	242919	CML495/CML494	SEEDGWAS1911	1	LT	LT	94	97	6	4254	URY	URUG 598	CATAMA		NA	C	F		B	J		BELLA VISTA	COLONIA PROGRESO	-34.4,-30.54	-56.13,-55.31
14221	URUG601_4257	238750	(CML269/CML264)/URUG601_4257	242913	CML269/CML264	SEEDGWAS1912	2	LT	LT	89	91	6	4257	URY	URUG 601	CATAMA		NA	F	C		B			BELLA VISTA	PARAGE SANTO DOMINGO	-32.53,-30.54	-55.81,-55.31
14245	URUG602_4258	238751	(CML495/CML494)/URUG602_4258	242919	CML495/CML494	SEEDGWAS1913	1	LT	LT	97	99	6	4258	URY	URUG 602	SYIVAM		NA	A	C		B	F		BELLA VISTA	PARAGE SANTO DOMINGO	-32.53,-30.54	-55.81,-55.31
14284	URUG729_4304	238753	(CML269/CML264)/URUG729_4304	242913	CML269/CML264	SEEDGWAS1915	2	LT	LT	89	91	6	4304	URY	URUG 729	CATPAG		NA	F			F	B	J	COLONIA	ESTANZUELA	-34.1,-32.53	-57.3,-55.81
14286	URUG745_4311	238754	(CML269/CML264)/URUG745_4311	242913	CML269/CML264	SEEDGWAS1916	1	LT	LT	91	100	8	4311	URY	URUG 745	PADENT		NA	C			B			LAVALLE	EST. ORTIZ	-32.53,-34.34	-55.81,-56.42
14302	FRGU784_4320	241905	(CML269/CML264)/FRGU784_4320	242913	CML269/CML264	SEEDGWAS834	2	LT	LT	90	90	2	4320	GUF	FRGU 784	NORCAT7		7	F	C		B	J		CAYENNE	CAYEN	4.56	-52.21
14308	FRGU788_4321	241906	(CML451/CML486)/FRGU788_4321	242916	CML451/CML486	SEEDGWAS835	1	LT	LT	92	98	6	4321	GUF	FRGU 788	FTCUBA	NORCAT	NA	F	C		B	J		CAYENNE	CAYEN	4.56	-52.21
14309	SURI797_4324	241306	(CML269/CML264)/SURI797_4324	242913	CML269/CML264	SEEDGWAS236	1	LT	LT	91	97	6	4324	SUR	SURI 797	NORCAT	COTRFT	NA	C			B	J	K		LELYDORP	5.71	-55.27
14310	SURI799_4326	241307	(CML269/CML264)/SURI799_4326	242913	CML269/CML264	SEEDGWAS237	1	LT	LT	94	95	6	4326	SUR	SURI 799	NORCAT		NA	C			B				BERNARDSDORP (BENSDORP)	3.68	-54.08
14322	SURI803_4329	241907	(CML269/CML264)/SURI803_4329	242913	CML269/CML264	SEEDGWAS836	2	LT	LT	95	95	6	4329	SUR	SURI 803	COTRFT	NORCAT	NA	F	C		B	J			MATTA	5.47	-55.35
14324	GUYA810_4336	241308	(CML495/CML494)/GUYA810_4336	242919	CML495/CML494	SEEDGWAS238	1	LT	LT	95	97	6	4336	GUY	GUYA 810	NORCAT9		9	C			B	J			BERBICE	6.17	-57.32
14351	GUYA812_4338	241908	(CML269/CML264)/GUYA812_4338	242913	CML269/CML264	SEEDGWAS837	1	LT	LT	73	73	1	4338	GUY	GUYA 812	LADYFI		NA	F			A				DEMERARA	6.48	-58.1
14352	GUYA813_4339	241309	(CML269/CML264)/GUYA813_4339	242913	CML269/CML264	SEEDGWAS239	1	LT	LT	94	96	6	4339	GUY	GUYA 813	NORCAT	FTCUBA	NA	F	C		B	J			RIO POMEROON	7.06	-58.5
14360	GUYA816_4340	241310	(CML495/CML494)/GUYA816_4340	242919	CML495/CML494	SEEDGWAS240	1	LT	LT	90	94	6	4340	GUY	GUYA 816	FTCUBA	NORCAT	NA	C			B				RIO POMEROON	7.06	-58.5
14364	GUYA817_4341	241311	(CML269/CML264)/GUYA817_4341	242913	CML269/CML264	SEEDGWAS241	1	LT	LT	96	94	6	4341	GUY	GUYA 817	NORCAT8		8	C			B	J			RIO POMEROON	7.06	-58.5
14368	BRAZ827_4347	239994	(CML269/CML264)/BRAZ827_4347	242913	CML269/CML264	SEEDGWAS3200	1	LT	LT	91	98	8	4347	BRA	BRAZ 827	DTRGRU9		9	C			B			RIO GRANDE DO SUL	CATUIPE	-29.2	-54.1
14401	BRAZ945_4406	241312	(CML495/CML494)/BRAZ945_4406	242919	CML495/CML494	SEEDGWAS242	1	LT	LT	89	90	6	4406	BRA	BRAZ 945	DTRGRU9		9	C			B			RIO GRANDE DO SUL	IJUI	-28.22	-53.53
14416	BRAZ953_4411	238756	(CML495/CML494)/BRAZ953_4411	242919	CML495/CML494	SEEDGWAS1918	1	LT	LT	95	100	6	4411	BRA	BRAZ 953	DTRGRU9		9	C			B	J		RIO GRANDE DO SUL	CERRO LARGO	-28.11	-54.44
14490	BRAZ1023_4456	239998	(CML269/CML264)/BRAZ1023_4456	242913	CML269/CML264	SEEDGWAS3204	2	LT	LT	91	96	6	4456	BRA	BRAZ 1023	DTRGRU9		9	C			B	D		RIO GRANDE DO SUL	GIRUA	-28.02	-54.2
14512	BRAZ1028_4460	239999	(CML269/CML264)/BRAZ1028_4460	242913	CML269/CML264	SEEDGWAS3205	2	LT	LT	90	91	6	4460	BRA	BRAZ 1028	DTRGRU9		9	C			B	J		RIO GRANDE DO SUL	R. DOS MACIEL	-29.2	-54.1
14514	BRAZ1042_4470	240000	(CML269/CML264)/BRAZ1042_4470	242913	CML269/CML264	SEEDGWAS3206	2	LT	LT	92	95	6	4470	BRA	BRAZ 1042	DTRGRU9		9	C			B			RIO GRANDE DO SUL	15 DE NOVEMBRO	-29.2	-54.1
14571	BRAZ1144_4530	238760	(CML495/CML494)/BRAZ1144_4530	242919	CML495/CML494	SEEDGWAS1922	1	LT	LT	97	99	6	4530	BRA	BRAZ 1144	DTRGRU9		9	C			B	A		RIO GRANDE DO SUL	ENTRE IJUIS	-28.22,NA	-53.53,NA
14606	BRAZ1190_4551	238761	(CML269/CML264)/BRAZ1190_4551	242913	CML269/CML264	SEEDGWAS1923	2	LT	LT	89	94	6	4551	BRA	BRAZ 1190	RGDENT		NA	C			B	A		RIO GRANDE DO SUL	CAMPOS NOVOS	-27.42,NA	-53.48,NA
14609	BRAZ1212_4563	238762	(CML269/CML264)/BRAZ1212_4563	242913	CML269/CML264	SEEDGWAS1924	1	LT	LT	93	95	6	4563	BRA	BRAZ 1212	CRAVRG9		9	C			B			RIO GRANDE DO SUL	LAGEADO CERNE	-29.2,NA	-54.1,NA
14630	BRAZ1215_4566	238764	(CML495/CML494)/BRAZ1215_4566	242919	CML495/CML494	SEEDGWAS1926	2	LT	LT	100	105	6	4566	BRA	BRAZ 1215	RGDENT		NA	C			B			RIO GRANDE DO SUL	CATUIPE	-29.2,NA	-54.1,NA
14631	BRAZ1223_4570	238765	(CML269/CML264)/BRAZ1223_4570	242913	CML269/CML264	SEEDGWAS1927	1	LT	LT	94	99	6	4570	BRA	BRAZ 1223	CRAVRG9		9	C			B			RIO GRANDE DO SUL	R. DOS MENDES	-29.2,NA	-54.1,NA
14634	BRAZ1251_4583	238767	(CML269/CML264)/BRAZ1251_4583	242913	CML269/CML264	SEEDGWAS1929	1	LT	LT	93	93	6	4583	BRA	BRAZ 1251	CRAVRG9		9	C			B	J		RIO GRANDE DO SUL	CATUIPE	-29.2,NA	-54.1,NA
14636	BRAZ1260_4588	238769	(CML269/CML264)/BRAZ1260_4588	242913	CML269/CML264	SEEDGWAS1931	2	LT	LT	93	95	6	4588	BRA	BRAZ 1260	RGDENT		NA	C			B			RIO GRANDE DO SUL	PINHAL RAMADA	-29.2,NA	-54.1,NA
14662	BRAZ1282_4599	238773	(CML495/CML494)/BRAZ1282_4599	242919	CML495/CML494	SEEDGWAS1935	2	LT	LT	95	97	6	4599	BRA	BRAZ 1282	RGDENT		NA	C			B			RIO GRANDE DO SUL	ENTRE IJUIS	-28.22,NA	-53.53,NA
14663	BRAZ1283_4600	238774	(CML269/CML264)/BRAZ1283_4600	242913	CML269/CML264	SEEDGWAS1936	1	LT	LT	93	94	6	4600	BRA	BRAZ 1283	CRAVRG9		9	C			B			RIO GRANDE DO SUL	COMANDAI	-29.2,NA	-54.1,NA
14670	BRAZ1287_4604	238776	(CML269/CML264)/BRAZ1287_4604	242913	CML269/CML264	SEEDGWAS1938	1	LT	LT	90	91	6	4604	BRA	BRAZ 1287	RGDENT		NA	C			B			RIO GRANDE DO SUL	CINCOENTENARIO	-29.2,NA	-54.1,NA
14676	BRAZ1303_4613	238778	(CML269/CML264)/BRAZ1303_4613	242913	CML269/CML264	SEEDGWAS1940	1	LT	LT	91	98	8	4613	BRA	BRAZ 1303	CRAVRG9		9	C			B			RIO GRANDE DO SUL	ENTRE IJUIS	-28.22	-53.53
14680	BRAZ1305_4615	238779	(CML269/CML264)/BRAZ1305_4615	242913	CML269/CML264	SEEDGWAS1941	1	LT	LT	93	96	6	4615	BRA	BRAZ 1305	RGDENT		NA	C			B			RIO GRANDE DO SUL	R. DOS MENDES	-29.2	-54.1
14687	BRAZ1313_4622	238780	(CML495/CML494)/BRAZ1313_4622	242919	CML495/CML494	SEEDGWAS1942	1	LT	LT	95	96	6	4622	BRA	BRAZ 1313	RGDENT		NA	C			B			RIO GRANDE DO SUL	CATUIPE	-29.2	-54.1
14700	BRAZ1439_4651	238782	(CML269/CML264)/BRAZ1439_4651	242913	CML269/CML264	SEEDGWAS1944	1	LT	LT	95	103	8	4651	BRA	BRAZ 1439	RGWHDT		NA	C			A	B	J	RIO GRANDE DO SUL	ENTRE IJUIS	-28.22	-53.53
14701	BRAZ1442_4654	238783	(CML269/CML264)/BRAZ1442_4654	242913	CML269/CML264	SEEDGWAS1945	1	LT	LT	86	90	6	4654	BRA	BRAZ 1442	RGWHDT9		9	C			A	J		RIO GRANDE DO SUL	L. 11 NORTE	-29.2	-54.1
14710	BRAZ1446_4657	238785	(CML495/CML494)/BRAZ1446_4657	242919	CML495/CML494	SEEDGWAS1947	1	LT	LT	95	98	6	4657	BRA	BRAZ 1446	RGWHDT		NA	C			A	B		RIO GRANDE DO SUL	ENTRE IJUIS	-28.22	-53.53
14713	BRAZ1462_4660	238786	(CML269/CML264)/BRAZ1462_4660	242913	CML269/CML264	SEEDGWAS1948	1	LT	LT	85	85	5	4660	BRA	BRAZ 1462	RGWHDT		NA	C			A	B		RIO GRANDE DO SUL	L. 6 NORTE	-29.2	-54.1
14722	BRAZ1486_4669	238787	(CML495/CML494)/BRAZ1486_4669	242919	CML495/CML494	SEEDGWAS1949	1	LT	LT	95	102	6	4669	BRA	BRAZ 1486	RGWHDT9		9	C			A	B	J	RIO GRANDE DO SUL	MUNICIPAL	-29.2	-54.1
14742	BRAZ1557_4711	238792	(CML269/CML264)/BRAZ1557_4711	242913	CML269/CML264	SEEDGWAS1954	2	LT	LT	89	90	6	4711	BRA	BRAZ 1557	SDENRG9		9	F	C		B	J		RIO GRANDE DO SUL	CHIAPETA	-29.2	-54.1
14744	BRAZ1558_4712	238793	(CML451/CML486)/BRAZ1558_4712	242916	CML451/CML486	SEEDGWAS1955	2	LT	LT	103	100	8	4712	BRA	BRAZ 1558	SDENRG9		9	F			B			RIO GRANDE DO SUL	GIRUA	-28.02	-54.2
14770	BRAZ1644_4736	241313	(CML269/CML264)/BRAZ1644_4736	242913	CML269/CML264	SEEDGWAS243	1	LT	LT	86	86	5	4736	BRA	BRAZ 1644	DTRGLI9		9	C			B	J		SANTA CATARINA	TUBARAO	-28.3	-49.01
14787	BRAZ1710_4745	242481	(CML495/CML494)/BRAZ1710_4745	242919	CML495/CML494	SEEDGWAS1410	1	LT	LT	90	93	6	4745	BRA	BRAZ 1710	PADENT		NA	C			B			SANTA CATARINA	ARARANGUA	-28.56	-49.29
14797	BRAZ1720_4749	238796	(CML269/CML264)/BRAZ1720_4749	242913	CML269/CML264	SEEDGWAS1958	1	LT	LT	89	90	6	4749	BRA	BRAZ 1720	DTRGLI9		9	C			B	K	A	RIO GRANDE DO SUL	S. J. INHACORA	-29.2	-54.1
14800	BRAZ1721_4750	238797	(CML495/CML494)/BRAZ1721_4750	242919	CML495/CML494	SEEDGWAS1959	1	LT	LT	96	97	6	4750	BRA	BRAZ 1721	DTRGRU9		9	C			B	A		RIO GRANDE DO SUL	ENTRE IJUIS	-28.22	-53.53
14806	BRAZ1729_4753	238798	(CML269/CML264)/BRAZ1729_4753	242913	CML269/CML264	SEEDGWAS1960	2	LT	LT	88	91	6	4753	BRA	BRAZ 1729	CATETO9		9	C			B	K	J	SAO PAULO	ORIENTE	-23.33	-46.38
14822	BRAZ1731_4755	241909	(CML269/CML264)/BRAZ1731_4755	242913	CML269/CML264	SEEDGWAS838	1	LT	LT	90	88	6	4755	BRA	BRAZ 1731	SPWHDT		NA	C			A	B		SAO PAULO	ITARIRI	-23.33	-46.38
14823	BRAZ1740_4762	241316	(CML495/CML494)/BRAZ1740_4762	242919	CML495/CML494	SEEDGWAS246	2	LT	LT	90	96	6	4762	BRA	BRAZ 1740	PADENT		NA	C			B			SAO PAULO	PEREIRA BARRETO	-20.38	-51.07
14837	BRAZ1750_4769	238799	(CML495/CML494)/BRAZ1750_4769	242919	CML495/CML494	SEEDGWAS1961	2	LT	LT	96	102	6	4769	BRA	BRAZ 1750	PADENT		NA	C			B	A	J	SAO PAULO	CRUZEIROS	-22.34	-44.58
14863	BRAZ1759_4776	241317	(CML495/CML494)/BRAZ1759_4776	242919	CML495/CML494	SEEDGWAS247	2	LT	LT	94	99	6	4776	BRA	BRAZ 1759	PADENT		NA	C	F		B	A		SAO PAULO	PEREIRA BARRETO	-20.38	-51.07
14870	BRAZ1766_4781	241319	(CML269/CML264)/BRAZ1766_4781	242913	CML269/CML264	SEEDGWAS249	1	LT	LT	92	92	6	4781	BRA	BRAZ 1766	PADENT		NA	C	F		B			SAO PAULO	DRACENA	-21.32	-51.29
14879	BRAZ1779_4785	238803	(CML495/CML494)/BRAZ1779_4785	242919	CML495/CML494	SEEDGWAS1965	1	LT	LT	100	104	6	4785	BRA	BRAZ 1779	PADENT		NA	C			B	A		SAO PAULO	GARCA	-22.14	-49.37
14886	BRAZ1808_4792	241320	(CML495/CML494)/BRAZ1808_4792	242919	CML495/CML494	SEEDGWAS250	2	LT	LT	90	89	2	4792	BRA	BRAZ 1808	PADENT9		9	C			B			SAO PAULO	NHANDEARA	-20.4	-50.02
14888	BRAZ1810_4794	242482	(CML495/CML494)/BRAZ1810_4794	242919	CML495/CML494	SEEDGWAS1411	1	LT	LT	92	94	6	4794	BRA	BRAZ 1810	PADENT		NA	C			B	K	J	SAO PAULO	POTIRENDABA	-21.08	-49.08
14889	BRAZ1827_4805	238804	(CML269/CML264)/BRAZ1827_4805	242913	CML269/CML264	SEEDGWAS1966	1	LT	LT	90	92	6	4805	BRA	BRAZ 1827	CHARUA		NA	C			B			SAO PAULO	PEDERNEIRAS	-23.33	-46.38
14920	BRAZ1830_4806	238805	(CML451/CML486)/BRAZ1830_4806	242916	CML451/CML486	SEEDGWAS1967	2	LT	LT	103	104	3	4806	BRA	BRAZ 1830	REDDNT		NA	C			J	B	K	SAO PAULO	TAQUARITUBA	-23.33	-46.38
14935	BRAZ1834_4810	241910	(CML269/CML264)/BRAZ1834_4810	242913	CML269/CML264	SEEDGWAS839	1	LT	LT	94	95	6	4810	BRA	BRAZ 1834	CRPYPA		NA	F	C		A	B		SAO PAULO	SANTA BRANCA	-23.24	-45.53
14956	BRAZ1844_4817	241321	(CML495/CML494)/BRAZ1844_4817	242919	CML495/CML494	SEEDGWAS251	2	LT	LT	89	96	8	4817	BRA	BRAZ 1844	PADENT9		9	F			B	A		SAO PAULO	PEREIRAS	-22.42	-46.24
14958	BRAZ1845_4818	242483	(CML451/CML486)/BRAZ1845_4818	242916	CML451/CML486	SEEDGWAS1412	1	LT	LT	94	94	6	4818	BRA	BRAZ 1845	PADENT9		9	C			B	A		SAO PAULO	RIO CLARO	-22.26	-47.34
14980	BRAZ1852_4824	241324	(CML495/CML494)/BRAZ1852_4824	242919	CML495/CML494	SEEDGWAS254	1	LT	LT	96	98	6	4824	BRA	BRAZ 1852	PADENT		NA	F	C		B	A		SAO PAULO	FARTURA	-21.37	-46.55
15026	BRAZ1898_4853	241326	(CML495/CML494)/BRAZ1898_4853	242919	CML495/CML494	SEEDGWAS256	1	LT	LT	93	92	6	4853	BRA	BRAZ 1898	PADENT9		9	C			B	A		SAO PAULO	RIBEIRAO BONITO	-23.17	-45.36
15041	BRAZ1899_4854	238814	(CML269/CML264)/BRAZ1899_4854	242913	CML269/CML264	SEEDGWAS1976	1	LT	LT	109	114	3	4854	BRA	BRAZ 1899	PADENT		NA	C	F		B	A		SAO PAULO	RIBEIRAO BONITO	-23.17	-45.36
15072	BRAZ1907_4862	241327	(CML495/CML494)/BRAZ1907_4862	242919	CML495/CML494	SEEDGWAS257	1	LT	LT	90	91	6	4862	BRA	BRAZ 1907	PADENT9		9	C			B	A		SAO PAULO	SAO CARLOS	-22.01	-47.54
15142	BRAZ1921_4874	241329	(CML495/CML494)/BRAZ1921_4874	242919	CML495/CML494	SEEDGWAS259	1	LT	LT	87	87	6	4874	BRA	BRAZ 1921	PADENT9		9	C			A	B	K	SAO PAULO	DUARTINA	-22.24	-49.25
15170	BRAZ1954_4893	242488	(CML451/CML486)/BRAZ1954_4893	242916	CML451/CML486	SEEDGWAS1417	1	LT	LT	92	94	6	4893	BRA	BRAZ 1954	PADENT9		9	C			B	A		SAO PAULO	OLIMPIA	-20.44	-48.54
15239	BRAZ2058_4945	241333	(CML495/CML494)/BRAZ2058_4945	242919	CML495/CML494	SEEDGWAS263	2	LT	LT	90	97	8	4945	BRA	BRAZ 2058	PADENT9		9	C			B	A		SAO PAULO	PENAPOLIS	-21.24	-50.04
15240	BRAZ2062_4948	238823	(CML269/CML264)/BRAZ2062_4948	242913	CML269/CML264	SEEDGWAS1985	1	LT	LT	110	115	3	4948	BRA	BRAZ 2062	AVMORO9		9	A			B			SAO PAULO	PENAPOLIS	-21.24	-50.04
15248	BRAZ2104_4958	241334	(CML495/CML494)/BRAZ2104_4958	242919	CML495/CML494	SEEDGWAS264	1	LT	LT	90	92	6	4958	BRA	BRAZ 2104	PADENT9		9	C			B	A		SAO PAULO	MIRASSOL	-23.33	-46.38
15275	BRAZ2132_4976	238826	(CML269/CML264)/BRAZ2132_4976	242913	CML269/CML264	SEEDGWAS1988	1	LT	LT	92	96	6	4976	BRA	BRAZ 2132	CATETO9		9	F	C		F			SAO PAULO	BURIGUI	-23.33	-46.38
15316	BRAZ2140_4983	238828	(CML269/CML264)/BRAZ2140_4983	242913	CML269/CML264	SEEDGWAS1990	1	LT	LT	90	95	6	4983	BRA	BRAZ 2140	CATETO9		9	C			B	J		SAO PAULO	SERRA AZUL	-23.33	-46.38
15326	BRAZ2144_4987	238830	(CML269/CML264)/BRAZ2144_4987	242913	CML269/CML264	SEEDGWAS1992	2	LT	LT	91	90	6	4987	BRA	BRAZ 2144	CRAVPA9		9	C			B	J		SAO PAULO	INDAIATUBA	-23.33	-46.38
15329	BRAZ2148_4990	241912	(CML451/CML486)/BRAZ2148_4990	242916	CML451/CML486	SEEDGWAS841	2	LT	LT	89	88	6	4990	BRA	BRAZ 2148	PADENT9		9	C			B	D		SAO PAULO	JARDINOPOLIS	-21.07	-47.46
15334	BRAZ2150_4992	238832	(CML269/CML264)/BRAZ2150_4992	242913	CML269/CML264	SEEDGWAS1994	2	LT	LT	91	96	6	4992	BRA	BRAZ 2150	PADENT		NA	C			B	J		SAO PAULO	FRANCA	-20.32	-47.24
15351	BRAZ2199_5014	242495	(CML451/CML486)/BRAZ2199_5014	242916	CML451/CML486	SEEDGWAS1424	2	LT	LT	90	91	6	5014	BRA	BRAZ 2199	PADENT9		9	C			B			SAO PAULO	SAO CARLOS	-22.01	-47.54
15408	BRAZ2293_5057	238838	(CML269/CML264)/BRAZ2293_5057	242913	CML269/CML264	SEEDGWAS2000	2	LT	LT	90	91	6	5057	BRA	BRAZ 2293	CATETO9		9	C			B	A		SAO PAULO	SAO JOSE DOS CAMPOS	-23.11	-45.53
15415	BRAZ2314_5061	238839	(CML269/CML264)/BRAZ2314_5061	242913	CML269/CML264	SEEDGWAS2001	1	LT	LT	93	95	6	5061	BRA	BRAZ 2314	PADENT		NA	C			B	J	A	SAO PAULO	BRAGANCE PAULISTA	-22.57	-46.34
15745	BRAZ2500_5147	238845	(CML269/CML264)/BRAZ2500_5147	242913	CML269/CML264	SEEDGWAS2007	2	LT	LT	100	98	8	5147	BRA	BRAZ 2500	CATCON		NA	F	C		B			MINAS GERAIS	FAZ. SERRAGEM CURVELO	-18.45	-44.25
15781	GUAT28_5156	241914	(CML269/CML264)/GUAT28_5156	242913	CML269/CML264	SEEDGWAS843	1	LT	LT	85	81	6	5156	GTM	GUAT 28	OLOTON		NA	F			B	A	J	ALTA VERAPAZ	LA TINTA	15.24	-90.23
15782	GUAT51_5158	241336	(CML269/CML264)/GUAT51_5158	242913	CML269/CML264	SEEDGWAS266	2	LT	LT	79	83	7	5158	GTM	GUAT 51	NALTEL	OLOTON	NA	C			A			CHIMALTENANGO	COMALAPA	14.46	-90.53
15805	GUAT58_5160	241915	(CML269/CML264)/GUAT58_5160	242913	CML269/CML264	SEEDGWAS844	1	LT	LT	75	77	1	5160	GTM	GUAT 58	NALTEL		NA	F			B	A		HUEHUETENANGO	JACALTENANGO	15.4	-91.41
15806	GUAT61_5162	241916	(CML451/CML486)/GUAT61_5162	242916	CML451/CML486	SEEDGWAS845	2	LT	LT	88	89	6	5162	GTM	GUAT 61	OLOTON		NA	C			A	B		SAN MARCOS	EL RECREO	14.57	-91.45
16054	GUAT286_5244	241918	(CML269/CML264)/GUAT286_5244	242913	CML269/CML264	SEEDGWAS847	2	LT	LT	85	85	5	5244	GTM	GUAT 286	COMITE		NA	C			B			SUCHITEPEQUEZ	EL NINO PALO GORDO	14.3	-91.3
16060	GUAT295_5248	241919	(CML269/CML264)/GUAT295_5248	242913	CML269/CML264	SEEDGWAS848	1	LT	LT	79	86	8	5248	GTM	GUAT 295	COMITE		NA	C			B	A	J	SUCHITEPEQUEZ	ALDEA CUTZAN	14.3	-91.3
16275	GUAT470_5271	241340	(CML269/CML264)/GUAT470_5271	242913	CML269/CML264	SEEDGWAS270	2	LT	LT	90	92	6	5271	GTM	GUAT 470	OLOTON		NA	C			A	K		HUEHUETENANGO	CUILCO	15.24	-91.56
16281	GUAT823_5314	241342	(CML269/CML264)/GUAT823_5314	242913	CML269/CML264	SEEDGWAS272	2	LT	LT	83	78	6	5314	GTM	GUAT 823	NALTEL		NA	C	F		B	K	A	ALTA VERAPAZ	PANZOS	15.25	-89.46
16412	CUBA6_5362	241922	(CML269/CML264)/CUBA6_5362	242913	CML269/CML264	SEEDGWAS851	2	LT	LT	84	83	6	5362	CUB	CUBA 6	FTCUBA	NORCAT	NA	F	C		B			LAS VILLAS	LIMONES KM38 CENTRAL SOLEDAD-RODAS	22.2	-80.32
16477	CUBA7_5363	241923	(CML269/CML264)/CUBA7_5363	242913	CML269/CML264	SEEDGWAS852	1	LT	LT	84	86	4	5363	CUB	CUBA 7	CUBAAM		NA	C	F		J	B		LAS VILLAS	LAGUNILLAS REDONDA CIENFUEGOS CENTRAL SOLEDAD	22.09	-80.16
16481	CUBA9_5365	241343	(CML269/CML264)/CUBA9_5365	242913	CML269/CML264	SEEDGWAS273	1	LT	LT	80	88	8	5365	CUB	CUBA 9	FTCUBA8		8	F	C		B	J			PINAR DEL RIO MARKET	22.25	-83.44
16486	CUBA17_5371	241345	(CML269/CML264)/CUBA17_5371	242913	CML269/CML264	SEEDGWAS275	1	LT	LT	90	86	6	5371	CUB	CUBA 17	CUBAAM	FTCUBA	NA	F	C		B			MATANZAS	GUANABANA CARRETERA 20KM. AL ESTE DE MATANZAS	23.03	-81.34
16487	CUBA18_5372	241346	(CML269/CML264)/CUBA18_5372	242913	CML269/CML264	SEEDGWAS276	1	LT	LT	79	87	8	5372	CUB	CUBA 18	FTCUBA	CUBBAM	NA	F	C		B			MATANZAS	GUANABANA CARRETERA 20KM. AL ESTE DE MATANZAS	23.03	-81.34
16489	CUBA27_5378	241924	(CML269/CML264)/CUBA27_5378	242913	CML269/CML264	SEEDGWAS853	1	LT	LT	89	91	6	5378	CUB	CUBA 27	TUSON8		8	C			B			ORIENTE	FILIPINAS GUANTANAMO	20.1	-75.12
16495	CUBA31_5380	241348	(CML269/CML264)/CUBA31_5380	242913	CML269/CML264	SEEDGWAS278	1	LT	LT	81	82	4	5380	CUB	CUBA 31	CHANDE		NA	C			B	J		ORIENTE	FINCA MANGUITO LAJAS DE CAUJERI	22.32	-80.55
16503	BRVI112_5403	241350	(CML269/CML264)/BRVI112_5403	242913	CML269/CML264	SEEDGWAS280	1	LT	LT	79	76	6	5403	VGB	BRVI 112	COSTCR	CHANDE	NA	C			F					NA	NA
16505	BRVI114_5405	241351	(CML269/CML264)/BRVI114_5405	242913	CML269/CML264	SEEDGWAS281	2	LT	LT	80	83	7	5405	VGB	BRVI 114	TUSON	CANILL	NA	C			B	J	F			NA	NA
16513	BRVI115_5406	241352	(CML269/CML264)/BRVI115_5406	242913	CML269/CML264	SEEDGWAS282	1	LT	LT	79	81	4	5406	VGB	BRVI 115	COSTCR	CHANDE	NA	C			J	B	F			NA	NA
16521	BRVI120_5409	241353	(CML269/CML264)/BRVI120_5409	242913	CML269/CML264	SEEDGWAS283	2	LT	LT	83	80	6	5409	VGB	BRVI 120	COSTCR6		6	C			B	D	I			NA	NA
16533	BRVI122_5410	241354	(CML495/CML494)/BRVI122_5410	242919	CML495/CML494	SEEDGWAS284	1	LT	LT	93	93	6	5410	VGB	BRVI 122	CANILL7		7	C	F		B	J				NA	NA
16536	BRVI123_5411	241355	(CML269/CML264)/BRVI123_5411	242913	CML269/CML264	SEEDGWAS285	1	LT	LT	96	94	6	5411	VGB	BRVI 123	COSTCR		NA	F			B	F	J			NA	NA
16593	BRVI127_5414	241357	(CML269/CML264)/BRVI127_5414	242913	CML269/CML264	SEEDGWAS287	2	LT	LT	96	98	6	5414	VGB	BRVI 127	HAITYE7		7	C			B	J	F			NA	NA
16601	BRVI130_5415	241358	(CML495/CML494)/BRVI130_5415	242919	CML495/CML494	SEEDGWAS288	1	LT	LT	97	99	6	5415	VGB	BRVI 130	CHANDE	CRLINO	NA	F			B	F	J			NA	NA
16691	BRVI144_5424	241360	(CML269/CML264)/BRVI144_5424	242913	CML269/CML264	SEEDGWAS290	2	LT	LT	72	72	1	5424	VGB	BRVI 144	EARCAR		NA	C			J	B				NA	NA
16692	BRVI145_5425	241361	(CML269/CML264)/BRVI145_5425	242913	CML269/CML264	SEEDGWAS291	2	LT	LT	83	88	8	5425	VGB	BRVI 145	EARCAR8		8	C			J					NA	NA
16727	BRVI157_5433	241363	(CML495/CML494)/BRVI157_5433	242919	CML495/CML494	SEEDGWAS293	1	LT	LT	89	89	6	5433	VGB	BRVI 157	TUSON8		8	C			B	J				NA	NA
16730	BRVI167_5437	241364	(CML495/CML494)/BRVI167_5437	242919	CML495/CML494	SEEDGWAS294	1	LT	LT	93	97	6	5437	VGB	BRVI 167	COSTCR	CARIAC	NA	C	F		B	F				NA	NA
16732	CAMP43_5449	241365	(CML269/CML264)/CAMP43_5449	242913	CML269/CML264	SEEDGWAS295	1	LT	LT	91	92	6	5449	MEX	CAMP 43	TUXPEN	NALTEL	NA	C			A					NA	NA
16736	COAH61_5456	240664	(CML269/CML264)/COAH61_5456	242913	CML269/CML264	SEEDGWAS3868	1	LT	LT	86	89	6	5456	MEX	COAH 61	TUXPEN		NA	C			B	A	J	MPIO. VILLA UNION	HACIENDA LA ALEGRIA	28.14	-100.44
16740	BRAZ1643_5463	241367	(CML269/CML264)/BRAZ1643_5463	242913	CML269/CML264	SEEDGWAS297	1	LT	LT	80	78	4	5463	BRA	BRAZ 1643	CHARUA	COLCAT	NA	C			B	I	J	SANTA CATARINA	TUBARAO	-28.3	-49.01
16744	BRAZ2501_5467	241369	(CML269/CML264)/BRAZ2501_5467	242913	CML269/CML264	SEEDGWAS299	1	LT	LT	83	83	4	5467	BRA	BRAZ 2501	PADENT9		9	C			B			MINAS GERAIS	VAE E VALTA SAO MIGUEL DO ANTA	-20.42	-42.43
16777	SNLP110_5477	241370	(CML495/CML494)/SNLP110_5477	242919	CML495/CML494	SEEDGWAS300	1	LT	LT	96	97	6	5477	MEX	SNLP 110	OLOTIL		NA	C			A	D	B		TAMPACAN	21.24	-98.43
16780	SNLP131_5480	241371	(CML269/CML264)/SNLP131_5480	242913	CML269/CML264	SEEDGWAS301	1	LT	LT	96	95	6	5480	MEX	SNLP 131	TUXPEN	OLOTIL	NA	C			A	B	J	AXTLA DE TERRAZAS	AXTLA DE TERRAZAS	21.43	-98.87
16788	BRAZ1652_5482	241925	(CML451/CML486)/BRAZ1652_5482	242916	CML451/CML486	SEEDGWAS854	2	LT	LT	89	91	6	5482	BRA	BRAZ 1652	DTRGLI9		9	C			B	J	F	SANTA CATARINA	TUBARAO	-28.3	-49.01
16868	BRAZ1353_5519	238852	(CML269/CML264)/BRAZ1353_5519	242913	CML269/CML264	SEEDGWAS2014	1	LT	LT	89	95	6	5519	BRA	BRAZ 1353	RGWHDT9		9	C			A	B	D	RIO GRANDE DO SUL	CATUIPE	-29.2	-54.1
16892	BRAZ2084_5541	242528	(CML373/CML311)/BRAZ2084_5541	242914	CML373/CML311	SEEDGWAS1457	1	LT	LT	90	88	6	5541	BRA	BRAZ 2084	PADENT9		9	C			B	A		SAO PAULO	MOGI MIRIM	-22.26	-46.57
16894	BRAZ2088_5545	241377	(CML495/CML494)/BRAZ2088_5545	242919	CML495/CML494	SEEDGWAS307	1	LT	LT	90	90	2	5545	BRA	BRAZ 2088	PADENT9		9	C			B			SAO PAULO	ITAPIRA	-22.26	-46.5
16899	BRAZ2093_5548	241378	(CML495/CML494)/BRAZ2093_5548	242919	CML495/CML494	SEEDGWAS308	2	LT	LT	87	87	6	5548	BRA	BRAZ 2093	PADENT9		9	C			B			SAO PAULO	SAO CARLOS	-22.01	-47.54
16921	SCRO8_5559	241928	(CML451/CML486)/SCRO8_5559	242916	CML451/CML486	SEEDGWAS857	2	LT	LT	89	90	6	5559	VIR	SCRO 8	STCROI		NA	C			J	B			CHRISTIANSTED	17.74	-64.7
16925	SCRO11_5561	241929	(CML269/CML264)/SCRO11_5561	242913	CML269/CML264	SEEDGWAS858	1	LT	LT	88	87	6	5561	VIR	SCRO 11	STCROI	EARCAR	NA	C			B	J			CHRISTIANSTED	17.74	-64.7
16931	BRAZ1665_5563	241930	(CML451/CML486)/BRAZ1665_5563	242916	CML451/CML486	SEEDGWAS859	1	LT	LT	90	89	2	5563	BRA	BRAZ 1665	DENTAD	AMARIL	NA	C			I	B		SANTA CATARINA	ARARANGUA	-28.56	-49.29
17036	CUBA36_5652	241381	(CML495/CML494)/CUBA36_5652	242919	CML495/CML494	SEEDGWAS311	1	LT	LT	88	86	6	5652	CUB	CUBA 36	CHANDE		NA	C			B	J		ORIENTE	FINCA MANGUITO LAJAS DE CAUJERI	22.32	-80.55
17054	CUBA64_5656	241382	(CML269/CML264)/CUBA64_5656	242913	CML269/CML264	SEEDGWAS312	1	LT	LT	82	84	4	5656	CUB	CUBA 64	CHANDE		NA	C			B	J		ORIENTE	15 KILOMETROS AL OESTE DE MAYARI	20.4	-75.4
17078	CUBA67_5657	241932	(CML269/CML264)/CUBA67_5657	242913	CML269/CML264	SEEDGWAS861	1	LT	LT	90	90	2	5657	CUB	CUBA 67	TUSON	FTCUBA	NA	C			B	J		ORIENTE	20 KILOMETROS AL OESTE DE HOLGUIN	20.54	-76.15
17080	BRVI100_5659	241383	(CML269/CML264)/BRVI100_5659	242913	CML269/CML264	SEEDGWAS313	1	LT	LT	89	89	6	5659	VGB	BRVI 100	CUBAAM8		8	F			B					NA	NA
17097	BRVI103_5661	241384	(CML269/CML264)/BRVI103_5661	242913	CML269/CML264	SEEDGWAS314	1	LT	LT	80	82	4	5661	VGB	BRVI 103	CUBAAM8		8	F			B	K	J			NA	NA
17100	BRVI151_5663	241385	(CML495/CML494)/BRVI151_5663	242919	CML495/CML494	SEEDGWAS315	2	LT	LT	89	89	6	5663	VGB	BRVI 151	TUSON	COSTCR	NA	C			B					NA	NA
17185	CRISTALINOAMARILLOMEZCL_5696	241386	(CML269/CML264)/CRISTALINOAMARILLOMEZCL_5696	242913	CML269/CML264	SEEDGWAS316	2	LT	LT	82	83	4	5696	MEX	CRISTALINO AMARILLO MEZCL	CATSUL		NA	F			F				SAN RAFAEL VERACRUZ 1965A PARCELA 2006-2071	20.11	-96.52
17201	TUXPENOCREMA1_5700	241387	(CML269/CML264)/TUXPENOCREMA1_5700	242913	CML269/CML264	SEEDGWAS317	2	LT	LT	80	80	4	5700	MEX	TUXPENO CREMA 1			NA	C			A	B	J		SAN RAFAEL VERACRUZ 1965A PARCELA 4148	20.12	-96.51
17222	CHIS96_5718	241389	(CML495/CML494)/CHIS96_5718	242919	CML495/CML494	SEEDGWAS319	2	LT	LT	90	92	6	5718	MEX	CHIS 96	TUXPEN	OLOTON	NA	C			A	B			ZOYOTITAN	16.17	-92.23
17243	GUER48_5719	240013	(CML269/CML264)/GUER48_5719	242913	CML269/CML264	SEEDGWAS3219	1	LT	LT	91	92	6	5719	MEX	GUER 48	TUXPEN	PEPITI	NA	C			A	B	K	CIUDAD ALTAMIRANO	PUNGARABATO	18.21	-100.4
17501	BRAZ1522_5802	238860	(CML269/CML264)/BRAZ1522_5802	242913	CML269/CML264	SEEDGWAS2022	1	LT	LT	105	109	3	5802	BRA	BRAZ 1522	SDENRG9		9	C	F		B			RIO GRANDE DO SUL	CHIAPETA	-29.2	-54.1
17508	BRVI129_5814	241390	(CML495/CML494)/BRVI129_5814	242919	CML495/CML494	SEEDGWAS320	1	LT	LT	94	96	6	5814	VGB	BRVI 129	HAITYE		NA	C			B	J	A			NA	NA
17541	FRGU794_5832	241392	(CML495/CML494)/FRGU794_5832	242919	CML495/CML494	SEEDGWAS322	2	LT	LT	90	91	6	5832	GUF	FRGU 794	NORCAT8		8	C			B	K		MACOURIA	CAYEN	4.55	-52.22
17556	OAXA229_5840	240245	(CML373/CML311)/OAXA229_5840	242914	CML373/CML311	SEEDGWAS3451	2	ST	ST	83	90	1	5840	MEX	OAXA 229	VANDEN	TEPECI	NA	C			A	B	J	JAMILTEPEC	JUQUILA	16.15	-97.17
17567	OAXA239_5845	242535	(CML269/CML264)/OAXA239_5845	242913	CML269/CML264	SEEDGWAS1464	1	LT	LT	59	59	8	5845	MEX	OAXA 239	ZAPCHI	NALTEL	NA	C			A			PINOTEPA NACIONAL	RANCHO VIEJO	16.17	-97.59
17572	OAXA244_5847	241935	(CML451/CML486)/OAXA244_5847	242916	CML451/CML486	SEEDGWAS864	2	LT	LT	89	88	6	5847	MEX	OAXA 244	OLOTIL8		8	C			B	A	K	SAN SEBASTIAN IXCAPA	COSTATITLAN (EL LIMON)	16.51	-98.12
17582	YUCA6_5860	241936	(CML269/CML264)/YUCA6_5860	242913	CML269/CML264	SEEDGWAS865	1	LT	LT	92	90	6	5860	MEX	YUCA 6	NALTEL	TUXPEN	NA	C			A	B			DZITAS	20.51	-88.31
17583	YUCA13_5861	241394	(CML269/CML264)/YUCA13_5861	242913	CML269/CML264	SEEDGWAS324	1	LT	LT	98	99	6	5861	MEX	YUCA 13	TUXPEN	NALTEL	NA	C			A	J	B		TEKAX	20.13	-89.17
17587	YUCA69_5863	241395	(CML269/CML264)/YUCA69_5863	242913	CML269/CML264	SEEDGWAS325	2	LT	LT	90	89	2	5863	MEX	YUCA 69	NALTEL	TUXPEN	NA	C			A				TIZIMIN	21.09	-88.09
17590	YUCA98_5865	241937	(CML451/CML486)/YUCA98_5865	242916	CML451/CML486	SEEDGWAS866	1	LT	LT	93	92	6	5865	MEX	YUCA 98	NALTEL	DZITBA	NA	C			J	B	A		YAHDZONAT	20.44	-88.44
17593	FRGU792_5871	241396	(CML269/CML264)/FRGU792_5871	242913	CML269/CML264	SEEDGWAS326	1	LT	LT	98	100	6	5871	GUF	FRGU 792	NORCAT		NA	F			B			FLECHE	IRACOUBO	5.29	-53.13
17596	BRAZ1789_5879	241397	(CML495/CML494)/BRAZ1789_5879	242919	CML495/CML494	SEEDGWAS327	1	LT	LT	87	87	6	5879	BRA	BRAZ 1789	PADENT9		9	C			B	A		SAO PAULO	CAJURU	-21.17	-47.18
17602	OAXA280_5888	239229	(CML269/CML264)/OAXA280_5888	242913	CML269/CML264	SEEDGWAS2435	1	ST	LT	98	112	2	5888	MEX	OAXA 280	CONICO	OLOTON	NA	C			A	B	K	HUAUTLA DE JIMENEZ	SAN ANDRES HIDALGO	18.08	-96.49
17740	CHIS202_5906	241938	(CML269/CML264)/CHIS202_5906	242913	CML269/CML264	SEEDGWAS867	1	LT	LT	103	NA	NA	5906	MEX	CHIS 202	TEPECI		NA	C			A	B		AMATENANGO DE LA FRONT	TAPITZALA NUMERO DOS	15.56	-92.14
17753	BRAZ1689_5907	238862	(CML269/CML264)/BRAZ1689_5907	242913	CML269/CML264	SEEDGWAS2024	1	LT	LT	90	91	6	5907	BRA	BRAZ 1689	REDDNT		NA	C			J	A	B	SANTA CATARINA	RIO DO SUL	-27.13	-49.39
19316	OAXA76_5939	240017	(CML269/CML264)/OAXA76_5939	242913	CML269/CML264	SEEDGWAS3223	1	LT	LT	106	109	3	5939	MEX	OAXA 76	TUXPEN	TEPECI	NA	C			A	B	J	POCHUTLA	CHALALTEPEC	15.45	-96.28
19337	BRAZ1772_5945	241399	(CML269/CML264)/BRAZ1772_5945	242913	CML269/CML264	SEEDGWAS329	2	LT	LT	86	88	6	5945	BRA	BRAZ 1772	PADENT9		9	C			J	B	A	SAO PAULO	PRESIDENTE WENCESLAU	-21.52	-51.5
19348	OAXA242_5948	241939	(CML269/CML264)/OAXA242_5948	242913	CML269/CML264	SEEDGWAS868	2	LT	LT	87	93	8	5948	MEX	OAXA 242	VANDEN		NA	C			A	B	K	SAN SEBASTIAN IXCAPA	COSTATITLAN (EL LIMON)	15.51	-98.12
19351	OAXA243_5949	241940	(CML269/CML264)/OAXA243_5949	242913	CML269/CML264	SEEDGWAS869	2	LT	LT	77	80	8	5949	MEX	OAXA 243	OLOTIL	NALTEL	NA	C			K	A	B	SAN SEBASTIAN IXCAPA	COSTATITLAN (EL LIMON)	16.51	-98.12
19352	OAXA245_5950	242537	(CML269/CML264)/OAXA245_5950	242913	CML269/CML264	SEEDGWAS1466	2	LT	LT	62	58	8	5950	MEX	OAXA 245	OLOTIL	TEPECI	NA	C			K	A	J	SAN SEBASTIAN IXCAPA	COSTATITLAN (EL LIMON)	16.51	-98.12
19380	OAXA257_5961	238867	(CML269/CML264)/OAXA257_5961	242913	CML269/CML264	SEEDGWAS2029	2	LT	LT	106	112	8	5961	MEX	OAXA 257	OLOTIL	NALTEL	NA	C			I	K	B	CACAHUATEPEC	SAN PEDRO AMUZGOS	16.4	-98.07
19594	BRAZ1943_6004	238870	(CML269/CML264)/BRAZ1943_6004	242913	CML269/CML264	SEEDGWAS2032	1	LT	LT	105	109	3	6004	BRA	BRAZ 1943	DENTAD	LENHA	NA	C			B			SAO PAULO	OLIMPIA	-20.44	-48.54
20012	BRAZ1681_6128	241400	(CML269/CML264)/BRAZ1681_6128	242913	CML269/CML264	SEEDGWAS330	1	LT	LT	80	83	7	6128	BRA	BRAZ 1681	CRISBL	DENTAD	NA	C			A	B		SANTA CATARINA	TURVO	-28.56	-49.41
20032	BRAZ1712_6137	238876	(CML269/CML264)/BRAZ1712_6137	242913	CML269/CML264	SEEDGWAS2038	2	LT	LT	89	89	6	6137	BRA	BRAZ 1712	DENTAD		NA	C			B	K	J	SANTA CATARINA	CHAPECO	-27.06	-52.36
20034	BRAZ1714_6138	238877	(CML269/CML264)/BRAZ1714_6138	242913	CML269/CML264	SEEDGWAS2039	2	LT	LT	91	95	6	6138	BRA	BRAZ 1714	DENTAD		NA	C			B	K	J	SANTA CATARINA	CHAPECO	-27.06	-52.36
20052	BRAZ1770_6152	241403	(CML495/CML494)/BRAZ1770_6152	242919	CML495/CML494	SEEDGWAS333	1	LT	LT	93	91	6	6152	BRA	BRAZ 1770	PADENT9		9	C			B	A		SAO PAULO	DRACENA	-21.32	-51.29
20076	BOLI1063_6268	241945	(CML451/CML486)/BOLI1063_6268	242916	CML451/CML486	SEEDGWAS874	1	LT	LT	87	87	6	6268	BOL	BOLI 1063	COROIC9		9	A	F		B	F	I		BENI	-10.23	-65.24
20360	URUG601_6531	240887	(CML269/CML264)/URUG601_6531	242913	CML269/CML264	SEEDGWAS4090	1	LT	LT	86	89	6	6531	URY	URUG 601	CATSUL		NA	F			B	K		RIVERA	R. 30 KM. 135 BUENA UNION-ARMANDINO GOMEZ	-32.53,-30.54	-55.81,-55.31
20410	BRAZ1826_6661	238880	(CML269/CML264)/BRAZ1826_6661	242913	CML269/CML264	SEEDGWAS2042	1	LT	LT	108	115	8	6661	BRA	BRAZ 1826	DENTAD	LENHA	NA	C			B			SAO PAULO	PEDERNEIRAS	-23.33	-46.38
20430	BRAZ1951_6685	241405	(CML269/CML264)/BRAZ1951_6685	242913	CML269/CML264	SEEDGWAS335	2	LT	LT	91	91	6	6685	BRA	BRAZ 1951	PADENT9		9	C			B			SAO PAULO	CASTILHO	-20.52	-51.29
20433	BRAZ1955_6687	238882	(CML269/CML264)/BRAZ1955_6687	242913	CML269/CML264	SEEDGWAS2044	2	LT	LT	109	117	8	6687	BRA	BRAZ 1955	PADENT		NA	C			B			SAO PAULO	OLIMPIA	-20.44	-48.54
20644	JALI276_7015	240026	(CML269/CML264)/JALI276_7015	242913	CML269/CML264	SEEDGWAS3232	1	LT	U	90	96	2	7015	MEX	JALI 276	TUXPEN	TABLON	NA	C			A	B	J		EL TUITO DE SAN PEDRO	20.19	-105.2
20647	JALI280_7019	240679	(CML269/CML264)/JALI280_7019	242913	CML269/CML264	SEEDGWAS3883	1	LT	LT	84	82	6	7019	MEX	JALI 280	TUXPEN		NA	C			B	D	I		EL TUITO DE SAN PEDRO	20.19	-105.2
20648	JALI283_7021	241946	(CML269/CML264)/JALI283_7021	242913	CML269/CML264	SEEDGWAS875	1	LT	LT	85	80	6	7021	MEX	JALI 283	TUXPEN	VANDEN	NA	C			A	D	B		EL TUITO DE SAN PEDRO	20.19	-105.2
20650	JALI285_7023	241411	(CML269/CML264)/JALI285_7023	242913	CML269/CML264	SEEDGWAS341	2	LT	LT	81	83	4	7023	MEX	JALI 285	VANDEN	TEPECI	NA	C			A	B	K		EL TUITO DE SAN PEDRO	20.19	-105.2
20661	NAYA168_7044	242549	(CML269/CML264)/NAYA168_7044	242913	CML269/CML264	SEEDGWAS1478	1	LT	LT	71	69	1	7044	MEX	NAYA 168	TABLON	TUXPEN	NA	C			B	A	K	VALLE DE BANDERAS	SAN JUAN DE ABAJO	20.49	-105.11
20735	NAYA275_7101	240688	(CML269/CML264)/NAYA275_7101	242913	CML269/CML264	SEEDGWAS3891	NA	LT	LT	86	88	6	7101	MEX	NAYA 275	TUXPEN	REVENT	NA	C			A	B	J	SURESTE DE DURANGO	HUAZAMOTA	22.32	-104.3
20920	SINA95_7201	241951	(CML269/CML264)/SINA95_7201	242913	CML269/CML264	SEEDGWAS880	1	LT	LT	86	80	6	7201	MEX	SINA 95	TUXPEN	COSTEN	NA	C			A	B	K	MUNICIPIO DE CHOIX	YECORATO	26.26	-108.14
20931	SINA101_7207	241952	(CML269/CML264)/SINA101_7207	242913	CML269/CML264	SEEDGWAS881	1	LT	LT	73	72	1	7207	MEX	SINA 101	LADYFI	REVENT	NA	F			B	K	A	MUNICIPIO DE CHOIX	CHICURAS	26.43	-108.2
20961	SONO74_7254	240721	(CML269/CML264)/SONO74_7254	242913	CML269/CML264	SEEDGWAS3924	1	LT	LT	86	87	6	7254	MEX	SONO 74	TUXPEN	ONAVEN	NA	C			A	B		30KM AL ESTE DE ALAMOS	PALO INJERTO	27.02	-108.56
21118	BRAZ1193_7492	241415	(CML269/CML264)/BRAZ1193_7492	242913	CML269/CML264	SEEDGWAS345	1	LT	LT	80	83	7	7492	BRA	BRAZ 1193	DTRGRU9		9	C			B	A		RIO GRANDE DO SUL	HUMAITA	-29.2,NA	-54.1,NA
21122	BRAZ1273_7521	238891	(CML269/CML264)/BRAZ1273_7521	242913	CML269/CML264	SEEDGWAS2053	1	LT	LT	91	91	6	7521	BRA	BRAZ 1273	RGDENT		NA	C			B			RIO GRANDE DO SUL	CATUIPE	-29.2,NA	-54.1,NA
21299	BRAZ2209_7789	241418	(CML495/CML494)/BRAZ2209_7789	242919	CML495/CML494	SEEDGWAS348	1	LT	LT	88	88	6	7789	BRA	BRAZ 2209	CRIOLL		NA	C			B			SAO PAULO	PATROCINIO PAUL	-20.38	-47.17
21303	BRAZ2221_7792	241419	(CML269/CML264)/BRAZ2221_7792	242913	CML269/CML264	SEEDGWAS349	2	LT	LT	81	80	4	7792	BRA	BRAZ 2221	PADENT9		9	C			B	J	F	SAO PAULO	CASA BRANCA	-21.46	-47.04
21314	BRAZ2237_7802	241420	(CML269/CML264)/BRAZ2237_7802	242913	CML269/CML264	SEEDGWAS350	1	LT	LT	90	90	2	7802	BRA	BRAZ 2237	PADENT9		9	C			B	A		SAO PAULO	COSMOPOLIS	-22.38	-47.12
21333	BRAZ2283_7813	241422	(CML269/CML264)/BRAZ2283_7813	242913	CML269/CML264	SEEDGWAS352	1	LT	LT	85	81	6	7813	BRA	BRAZ 2283	CRIOLL		NA	C			B	A		SAO PAULO	TIETE	-23.07	-47.43
21390	ECUA629_7915	241425	(CML269/CML264)/ECUA629_7915	242913	CML269/CML264	SEEDGWAS355	1	LT	LT	89	90	6	7915	ECU	ECUA 629	TUXPEN9		9	C			A	B	J		MANABI	-0.4	-80.05
21724	NAYA175_7989	241956	(CML269/CML264)/NAYA175_7989	242913	CML269/CML264	SEEDGWAS885	2	LT	LT	90	90	2	7989	MEX	NAYA 175	TUXPEN	REVENT	NA	C			K	B	A	COMPOSTELA	EJIDO OTATES	21.19	-105.11
21755	MICH335_8071	241957	(CML269/CML264)/MICH335_8071	242913	CML269/CML264	SEEDGWAS886	2	LT	LT	88	77	8	8071	MEX	MICH 335			NA	C			A	B		APO	EL GUAYABAL	19.26	-101.37
21760	MICH338_8074	239274	(CML269/CML264)/MICH338_8074	242913	CML269/CML264	SEEDGWAS2480	2	ST	LT	91	106	2	8074	MEX	MICH 338	CONICO		NA	C			A	B		APO	LA ALAHAJA	19.25	-102.24
21861	GUAT83_8115	241958	(CML269/CML264)/GUAT83_8115	242913	CML269/CML264	SEEDGWAS887	2	LT	LT	80	80	4	8115	GTM	GUAT 83	OLOTON		NA	C			B	J		SUCHITEPEQUEZ	FINCA SAN RAFAEL PANAN	14.3	-91.3
21869	ECUA336_8149	241959	(CML269/CML264)/ECUA336_8149	242913	CML269/CML264	SEEDGWAS888	1	LT	LT	85	90	8	8149	ECU	ECUA 336	CHOCOC		NA	F			B	A	J		BORLON PICHIYACU	-1.27	-81.08
21884	ECUA365_8161	241428	(CML495/CML494)/ECUA365_8161	242919	CML495/CML494	SEEDGWAS358	2	LT	LT	91	89	6	8161	ECU	ECUA 365	MCUBAN		NA	F	C		B	A			CHACRAS	-3.53	-80.16
21993	ECUA858_8309	241429	(CML269/CML264)/ECUA858_8309	242913	CML269/CML264	SEEDGWAS359	1	LT	LT	80	89	8	8309	ECU	ECUA 858	MCUBAN		NA	F			B	A	J		PICHINCHA	-0.1	-78.4
22001	ECUA861_8311	241430	(CML495/CML494)/ECUA861_8311	242919	CML495/CML494	SEEDGWAS360	2	LT	LT	104	104	3	8311	ECU	ECUA 861	MCUBAN		NA	F			B	J	A		ESMERALDAS	0.4	-79.3
22061	ECUA895_8319	241960	(CML451/CML486)/ECUA895_8319	242916	CML451/CML486	SEEDGWAS889	1	LT	LT	85	89	6	8319	ECU	ECUA 895	CHOCOC		NA	C	F		A	B			MANABI	-0.4	-80.05
22064	ECUA926_8327	241431	(CML269/CML264)/ECUA926_8327	242913	CML269/CML264	SEEDGWAS361	2	LT	LT	85	89	6	8327	ECU	ECUA 926	MCUBAN	FTCUBA	NA	F			B	A			ESMERALDAS	0.4	-79.3
22065	ECUA939_8333	241432	(CML269/CML264)/ECUA939_8333	242913	CML269/CML264	SEEDGWAS362	2	LT	LT	88	89	6	8333	ECU	ECUA 939	MCUBAN		NA	C			B	A	J		EL ORO	-3.3	-79.5
22069	ECUA947_8335	241433	(CML269/CML264)/ECUA947_8335	242913	CML269/CML264	SEEDGWAS363	2	LT	LT	85	85	5	8335	ECU	ECUA 947	MCUBAN		NA	C	F		B	A	J		PICHINCHA	-0.1	-78.4
22070	ECUA951_8338	241434	(CML269/CML264)/ECUA951_8338	242913	CML269/CML264	SEEDGWAS364	1	LT	LT	98	99	6	8338	ECU	ECUA 951	CHOCOC		NA	F			B	A			ESMERALDAS	0.4	-79.3
22589	PERU1336_9033	241963	(CML269/CML264)/PERU1336_9033	242913	CML269/CML264	SEEDGWAS892	1	LT	LT	78	83	8	9033	PER	PERU 1336	CUBANO		NA	C			B				LIMA	-12.03	-77.03
22607	SLUCGP4_9049	241440	(CML269/CML264)/SLUCGP4_9049	242913	CML269/CML264	SEEDGWAS370	1	LT	LT	93	90	6	9049	LCA	SLUC GP4			NA	C			J	B				NA	NA
22741	BRAZ1056_9134	238907	(CML269/CML264)/BRAZ1056_9134	242913	CML269/CML264	SEEDGWAS2069	1	LT	LT	95	95	6	9134	BRA	BRAZ 1056	RGDENT		NA	C			B			RIO GRANDE DO SUL	ALTO UNIAO	-29.2	-54.1
22767	BRAZ1645_9141	241965	(CML269/CML264)/BRAZ1645_9141	242913	CML269/CML264	SEEDGWAS894	1	LT	LT	89	89	6	9141	BRA	BRAZ 1645	DTRGLI9		9	C			B	J	F	SANTA CATARINA	TUBARAO	-28.3	-49.01
22831	BRAZ51_9194	238912	(CML269/CML264)/BRAZ51_9194	242913	CML269/CML264	SEEDGWAS2118	2	LT	LT	91	97	6	9194	BRA	BRAZ 51	AVMORO9		9	C	A		A	B	K	MATO GROSSO	DOURADOS	-22.13	-54.48
22917	BRAZ1107_9541	240306	(CML269/CML264)/BRAZ1107_9541	242913	CML269/CML264	SEEDGWAS3512	1	ST	LT	108	109	1	9541	BRA	BRAZ 1107			NA	F			A	B	K			-22.18,NA	-54.14,NA
22969	BRAZ1188_9622	240319	(CML495/CML494)/BRAZ1188_9622	242919	CML495/CML494	SEEDGWAS3525	2	LT	LT	100	102	6	9622	BRA	BRAZ 1188			NA	C			B	J				-28.22,NA	-53.53,NA
23090	BRAZ1259_9693	240329	(CML269/CML264)/BRAZ1259_9693	242913	CML269/CML264	SEEDGWAS3535	2	ST	LT	112	113	1	9693	BRA	BRAZ 1259			NA	C			A	B				-29.2,NA	-54.1,NA
23093	BRAZ1260_9694	240330	(CML495/CML494)/BRAZ1260_9694	242919	CML495/CML494	SEEDGWAS3536	2	LT	LT	95	104	8	9694	BRA	BRAZ 1260			NA	C			B	J				-29.2,NA	-54.1,NA
23177	VENE337_9797	241445	(CML269/CML264)/VENE337_9797	242913	CML269/CML264	SEEDGWAS375	1	LT	LT	90	92	6	9797	VEN	VENE 337	PUYA		NA	C			B				LOS CHIQUIES	NA	NA
23185	VENE444_9817	241446	(CML269/CML264)/VENE444_9817	242913	CML269/CML264	SEEDGWAS376	2	LT	LT	89	90	6	9817	VEN	VENE 444	COSTEN		NA	F	C		A	B	J		CAGUA	10.12	-67.2
23194	VENE502_9828	241447	(CML269/CML264)/VENE502_9828	242913	CML269/CML264	SEEDGWAS377	1	LT	LT	80	85	8	9828	VEN	VENE 502	COSTEN		NA	C			F	A	B		GUAIQUERE	NA	NA
23199	VENE541_9831	242590	(CML269/CML264)/VENE541_9831	242913	CML269/CML264	SEEDGWAS1519	2	LT	LT	71	73	1	9831	VEN	VENE 541	CARIAC		NA	A			A				ZARAZA	9.21	-65.29
23200	VENE564_9836	241967	(CML269/CML264)/VENE564_9836	242913	CML269/CML264	SEEDGWAS896	2	LT	LT	75	74	4	9836	VEN	VENE 564	GUARIB		NA	F			A	B	K		ANZOATEGUI	8.54	-64.13
23204	VENE575_9841	241968	(CML269/CML264)/VENE575_9841	242913	CML269/CML264	SEEDGWAS897	2	LT	LT	85	86	4	9841	VEN	VENE 575	CARIAC		NA	A			A	B	J		CARIACO	9.48	-67.18
23205	VENE581_9845	242592	(CML269/CML264)/VENE581_9845	242913	CML269/CML264	SEEDGWAS1521	1	LT	LT	86	87	6	9845	VEN	VENE 581	GUARIB		NA	F			A	B			GUARICO	9.48	-67.18
23249	VENE609_9865	241449	(CML269/CML264)/VENE609_9865	242913	CML269/CML264	SEEDGWAS379	2	LT	LT	82	82	4	9865	VEN	VENE 609	GUARIB		NA	F			B	A	K		GUARICO	9.48	-67.18
23302	VENE650_9887	241451	(CML269/CML264)/VENE650_9887	242913	CML269/CML264	SEEDGWAS381	1	LT	LT	90	86	6	9887	VEN	VENE 650	CUBAAM9		9	F			B	A	J		ANZOATEGUI	8.54	-64.13
23316	VENE668_9895	241969	(CML269/CML264)/VENE668_9895	242913	CML269/CML264	SEEDGWAS898	1	LT	LT	77	76	4	9895	VEN	VENE 668	PAILON		NA	F			B	A			PORTUGUESA	9.3	-69.16
23331	VENE680_9902	241970	(CML269/CML264)/VENE680_9902	242913	CML269/CML264	SEEDGWAS899	1	LT	LT	94	94	6	9902	VEN	VENE 680	NEGRIT		NA	F			I	B			BOLIVAR	6.2	-63.3
23334	VENE682_9904	241452	(CML451/CML486)/VENE682_9904	242916	CML451/CML486	SEEDGWAS382	1	LT	LT	87	81	6	9904	VEN	VENE 682	COSTEN		NA	F			A				ANZOATEGUI	8.54	-64.13
23336	VENE683_9905	241453	(CML269/CML264)/VENE683_9905	242913	CML269/CML264	SEEDGWAS383	2	LT	LT	80	78	4	9905	VEN	VENE 683	COSTEN		NA	C	A		B	A			BOLIVAR	6.2	-63.3
23342	VENE777_9924	241456	(CML269/CML264)/VENE777_9924	242913	CML269/CML264	SEEDGWAS386	1	LT	LT	90	90	2	9924	VEN	VENE 777	COSTEN		NA	C			B	A			CARABOBO	10.1	-68.05
23355	VENE785_9932	241457	(CML269/CML264)/VENE785_9932	242913	CML269/CML264	SEEDGWAS387	1	LT	LT	81	83	4	9932	VEN	VENE 785	TUSON		NA	C			B	F			FALCON	11.18	-69.36
23356	VENE788_9934	242604	(CML495/CML494)/VENE788_9934	242919	CML495/CML494	SEEDGWAS1533	1	LT	LT	86	92	8	9934	VEN	VENE 788	ARAGUI		NA	C			A				FALCON	11.18	-69.36
23381	VENE800_9944	241458	(CML495/CML494)/VENE800_9944	242919	CML495/CML494	SEEDGWAS388	1	LT	LT	87	88	6	9944	VEN	VENE 800	PUYAGR		NA	C			A	J			FALCON	11.18	-69.36
23390	VENE809_9953	241972	(CML269/CML264)/VENE809_9953	242913	CML269/CML264	SEEDGWAS901	1	LT	LT	88	90	6	9953	VEN	VENE 809	NEGRIT		NA	C			A	K	B		FALCON	11.18	-69.36
23424	VENE832_9965	241462	(CML495/CML494)/VENE832_9965	242919	CML495/CML494	SEEDGWAS392	1	LT	LT	90	90	2	9965	VEN	VENE 832	COSTEN9		9	C	F		A	J			YARACUY	10.2	-69.1
23443	VENE844_9971	241463	(CML269/CML264)/VENE844_9971	242913	CML269/CML264	SEEDGWAS393	2	LT	LT	90	90	2	9971	VEN	VENE 844	COSTEN		NA	C			A	J	B		YARACUY	10.2	-69.1
23461	VENE861_9976	241465	(CML269/CML264)/VENE861_9976	242913	CML269/CML264	SEEDGWAS395	2	LT	LT	86	86	5	9976	VEN	VENE 861	COSTEN		NA	C			A				YARACUY	10.2	-69.1
23485	VENE892_9985	241467	(CML495/CML494)/VENE892_9985	242919	CML495/CML494	SEEDGWAS397	1	LT	LT	89	95	6	9985	VEN	VENE 892	COSTEN		NA	C			A	B			LARA	10.1	-69.5
23504	VENE898_9989	242609	(CML495/CML494)/VENE898_9989	242919	CML495/CML494	SEEDGWAS1538	1	LT	LT	87	83	6	9989	VEN	VENE 898	COSTEN		NA	C			A				LARA	10.1	-69.5
23510	VENE920_9997	241974	(CML451/CML486)/VENE920_9997	242916	CML451/CML486	SEEDGWAS903	1	LT	LT	89	89	6	9997	VEN	VENE 920	NEGRIT		NA	C			A	K	B		TRUJILLO	9.2	-70.3
23548	VENE929_10000	241468	(CML495/CML494)/VENE929_10000	242919	CML495/CML494	SEEDGWAS398	2	LT	LT	91	96	6	10000	VEN	VENE 929	COMUN		NA	C			A	B	J		TRUJILLO	9.2	-70.3
23581	VENE363_10049	241976	(CML269/CML264)/VENE363_10049	242913	CML269/CML264	SEEDGWAS905	2	LT	LT	90	92	6	10049	VEN	VENE 363	GUARIB		NA	F			A	B			EL BARNIL	NA	NA
23582	VENE534_10056	241469	(CML269/CML264)/VENE534_10056	242913	CML269/CML264	SEEDGWAS399	2	LT	LT	86	86	5	10056	VEN	VENE 534	CHANDE		NA	F			A	B	J		CENICERA	NA	NA
23624	VENE587_10133	241470	(CML495/CML494)/VENE587_10133	242919	CML495/CML494	SEEDGWAS400	2	LT	LT	92	94	6	10133	VEN	VENE 587	PUYAGR9		9	F			A	J			COJEDES	9.2	-68.2
23660	BOLI437_10218	238917	(CML269/CML264)/BOLI437_10218	242913	CML269/CML264	SEEDGWAS2123	2	LT	LT	89	92	6	10218	BOL	BOLI 437	PEROLA		NA	F	C		A	J	B		SANTA CRUZ	-17.48	-63.1
23695	CHIS112_10460	241471	(CML269/CML264)/CHIS112_10460	242913	CML269/CML264	SEEDGWAS401	1	LT	LT	81	88	8	10460	MEX	CHIS 112	VANDEN9		9	C			B	A			ESCUINTLA	15.2	-92.4
23699	CHIS440_10464	241472	(CML269/CML264)/CHIS440_10464	242913	CML269/CML264	SEEDGWAS402	1	LT	LT	81	82	4	10464	MEX	CHIS 440	OLOTIL6		6	C			A				TOTOLAPA	16.36	-92.41
23708	CHIS631_10469	241977	(CML269/CML264)/CHIS631_10469	242913	CML269/CML264	SEEDGWAS906	2	LT	LT	80	83	7	10469	MEX	CHIS 631	TUXPEN		NA	C			A	B			MAPASTEPEC	15.16	-92.54
23715	QROO20_10507	241978	(CML269/CML264)/QROO20_10507	242913	CML269/CML264	SEEDGWAS907	1	LT	LT	88	89	6	10507	MEX	QROO 20	DZITBA7		7	C			A	B			ISLA MUJERES	21.12	-86.43
23758	URUG298_10615	240764	(CML269/CML264)/URUG298_10615	242913	CML269/CML264	SEEDGWAS3967	2	LT	LT	84	86	4	10615	URY	URUG 298	PISANK		NA	F			I	B		CANELONES	R. 88 KILOMETRO 0.5-JULIO PARODI	-34.35	-56.15
23787	BRAZ3929LC_10743	238923	(CML269/CML264)/BRAZ3929LC_10743	242913	CML269/CML264	SEEDGWAS2129	2	LT	LT	109	108	8	10743	BRA	BRAZ 3929LC			NA	G	F		B	A	C	RORAIMA		1	-61
23789	BRAZ3978LC_10767	238925	(CML269/CML264)/BRAZ3978LC_10767	242913	CML269/CML264	SEEDGWAS2131	1	LT	LT	110	115	3	10767	BRA	BRAZ 3978LC			NA	C			B			RORAIMA		1	-61
23794	BRAZ3985LC_10774	238927	(CML269/CML264)/BRAZ3985LC_10774	242913	CML269/CML264	SEEDGWAS2133	1	LT	LT	109	114	3	10774	BRA	BRAZ 3985LC			NA	C	F	L	B	F		RORAIMA		1	-61
23814	BRAZ4041LC_10796	238930	(CML269/CML264)/BRAZ4041LC_10796	242913	CML269/CML264	SEEDGWAS2136	2	LT	LT	111	112	3	10796	BRA	BRAZ 4041LC			NA	F	L		B	F		RORAIMA		1	-61
23835	BRAZ51AR_10859	238938	(CML269/CML264)/BRAZ51AR_10859	242913	CML269/CML264	SEEDGWAS2144	1	LT	LT	104	105	3	10859	BRA	BRAZ 51AR			NA	F			B	J		ACRE		-9	-70
23846	BRAZ90AR_10876	240047	(CML269/CML264)/BRAZ90AR_10876	242913	CML269/CML264	SEEDGWAS3253	1	LT	LT	83	95	8	10876	BRA	BRAZ 90AR			NA	A			B			ACRE		-9	-70
23857	BRAZ133AR_10901	238942	(CML269/CML264)/BRAZ133AR_10901	242913	CML269/CML264	SEEDGWAS2148	2	LT	LT	106	108	3	10901	BRA	BRAZ 133AR			NA	F			I			RONDONIA	GUAJARA MIRIM	-10.48	-65.22
23870	VENE386_11066	241979	(CML269/CML264)/VENE386_11066	242913	CML269/CML264	SEEDGWAS908	1	LT	LT	85	85	5	11066	VEN	VENE 386	CHANDE		NA	C			B			ARAGUA	PERIQUITO (CASERI)	9.48	-63.3
23872	VENE391_11071	241477	(CML269/CML264)/VENE391_11071	242913	CML269/CML264	SEEDGWAS407	1	LT	LT	80	82	4	11071	VEN	VENE 391	TUSON		NA	F			B			ARAGUA	LA ENCRUCIJADA	9.48	-63.3
23883	VENE545_11138	241480	(CML495/CML494)/VENE545_11138	242919	CML495/CML494	SEEDGWAS410	2	LT	LT	88	88	6	11138	VEN	VENE 545			NA	C			B			SUCRE	BUENA VISTA	10.4	-70.1
23884	VENE648_11160	241481	(CML269/CML264)/VENE648_11160	242913	CML269/CML264	SEEDGWAS411	1	LT	LT	83	81	6	11160	VEN	VENE 648	PUYAGR		NA	C			B				BOLIVAR	6.2	-63.3
23892	VENE705_11180	238943	(CML269/CML264)/VENE705_11180	242913	CML269/CML264	SEEDGWAS2149	2	LT	LT	110	114	3	11180	VEN	VENE 705	PUYAGR		NA	C			B				MONAGAS	9.36	-63.06
23894	VENE730_11198	241981	(CML269/CML264)/VENE730_11198	242913	CML269/CML264	SEEDGWAS910	2	LT	LT	89	90	6	11198	VEN	VENE 730			NA	C			B				BOLIVAR	6.2	-63.3
23895	VENE732_11200	241982	(CML269/CML264)/VENE732_11200	242913	CML269/CML264	SEEDGWAS911	1	LT	LT	80	75	6	11200	VEN	VENE 732	PAILON		NA	C	F		A				PORTUGUESA	9.3	-69.16
23899	VENE747_11210	241483	(CML495/CML494)/VENE747_11210	242919	CML495/CML494	SEEDGWAS413	2	LT	LT	90	90	2	11210	VEN	VENE 747	PUYAGR		NA	C			B	A			MONAGAS	9.36	-63.06
23900	VENE750_11213	241983	(CML269/CML264)/VENE750_11213	242913	CML269/CML264	SEEDGWAS912	1	LT	LT	94	94	6	11213	VEN	VENE 750	PUYAGR		NA	F	C		A	J			COJEDES	9.24	-68.3
23901	VENE751_11214	241984	(CML269/CML264)/VENE751_11214	242913	CML269/CML264	SEEDGWAS913	2	LT	LT	77	80	8	11214	VEN	VENE 751	GUARIB		NA	F			A				ANZOATEGUI	8.54	-64.13
23905	VENE820_11241	241484	(CML269/CML264)/VENE820_11241	242913	CML269/CML264	SEEDGWAS414	2	LT	LT	85	85	5	11241	VEN	VENE 820	PUYAGR		NA	C			B	A	J	FALCON	MAPARARI (DTO FEDERACION)	10.47	-69.25
23906	VENE823_11242	241985	(CML269/CML264)/VENE823_11242	242913	CML269/CML264	SEEDGWAS914	1	LT	LT	85	83	6	11242	VEN	VENE 823	PUYA		NA	C	F		A	B		CARABOBO	PUERTO CABELLO (VALLE SECO)	10.1	-68.05
23907	VENE824_11243	241986	(CML269/CML264)/VENE824_11243	242913	CML269/CML264	SEEDGWAS915	2	LT	LT	94	93	6	11243	VEN	VENE 824			NA	C			A			CARABOBO	VALLERITO (EL CAMBAR)	10.1	-68.05
23908	VENE839_11250	241485	(CML269/CML264)/VENE839_11250	242913	CML269/CML264	SEEDGWAS415	1	LT	LT	81	83	4	11250	VEN	VENE 839	COSTEN		NA	F			B	A	J		YARACUY	10.2	-69.1
23913	VENE859_11263	241486	(CML269/CML264)/VENE859_11263	242913	CML269/CML264	SEEDGWAS416	1	LT	LT	86	88	6	11263	VEN	VENE 859	COSTEN		NA	F	C		F			YARACUY	PALMAREJO	10.2	-69.1
23923	VENE961_11327	241487	(CML269/CML264)/VENE961_11327	242913	CML269/CML264	SEEDGWAS417	2	LT	LT	85	87	4	11327	VEN	VENE 961	COSTEN		NA	D	F		B	A		TACHIRA	EL DESVIO	7.5	-72.05
23926	VENE971_11337	241988	(CML269/CML264)/VENE971_11337	242913	CML269/CML264	SEEDGWAS917	1	LT	LT	90	87	6	11337	VEN	VENE 971	CARIAC		NA	A			B				BARINAS	8.4	-70.15
24105	CHIS567_13341	242874	(CML495/CML494)/CHIS567_13341	242919	CML495/CML494	SEEDGWAS1803	1	ST	LT	54	54	1	13341	MEX	CHIS 567	TUXPEN	OLOTIL	NA	C			A	B			TERAN	16.45	-93.1
24107	RDOM190_13345	241990	(CML269/CML264)/RDOM190_13345	242913	CML269/CML264	SEEDGWAS919	2	LT	LT	89	80	8	13345	DOM	RDOM 190			NA	C			B			SANTIAGO	GUAYABAL	19.3	-71.05
24169	RDOM114_13362	241993	(CML269/CML264)/RDOM114_13362	242913	CML269/CML264	SEEDGWAS922	1	LT	LT	86	86	5	13362	DOM	RDOM 114			NA	C			B			BARAHONA	JUAN ESTEBAN	18.7	-70.16
24315	GUAT829_13788	241490	(CML269/CML264)/GUAT829_13788	242913	CML269/CML264	SEEDGWAS420	1	LT	LT	83	84	4	13788	GTM	GUAT 829	TUXPEN	OLOTON	NA	C			B	A	D			NA	NA
24317	GUER376_13796	242631	(CML373/CML311)/GUER376_13796	242914	CML373/CML311	SEEDGWAS1560	2	LT	ST	83	85	1	13796	MEX	GUER 376	TUXPEN		NA	C			A	J	B	CUAJINICUILAPA	BARAJILLA	16.28	-98.25
24319	HAIT13_13797	241996	(CML269/CML264)/HAIT13_13797	242913	CML269/CML264	SEEDGWAS925	2	LT	LT	93	95	6	13797	HTI	HAIT 13	HAITYE		NA	F			J	B			JOSAPHA-W. OF JEREMIE	18.39	-74.07
24411	RDOM112_13994	242000	(CML269/CML264)/RDOM112_13994	242913	CML269/CML264	SEEDGWAS929	1	LT	LT	80	76	6	13994	DOM	RDOM 112			NA	C			B	J	A	SANTIAGO	EL PAPAYO	19.3	-71.05
24421	RDOM147_13997	242001	(CML269/CML264)/RDOM147_13997	242913	CML269/CML264	SEEDGWAS930	1	LT	LT	80	80	4	13997	DOM	RDOM 147			NA	C			B	I		ALTAGRACIA	SALADO, HIGUEY	18.61	-68.7
24426	RDOM218_13998	242002	(CML269/CML264)/RDOM218_13998	242913	CML269/CML264	SEEDGWAS931	2	LT	LT	85	81	6	13998	DOM	RDOM 218			NA	C			B	J		SANTIAGO	EL GUANO	19.3	-71.05
24464	VERA642_14099	241491	(CML269/CML264)/VERA642_14099	242913	CML269/CML264	SEEDGWAS421	2	LT	LT	86	86	5	14099	MEX	VERA 642			NA	C			A	I			ACATLAN	19.42	-96.5
24636	BOZM260_14289	238950	(CML269/CML264)/BOZM260_14289	242913	CML269/CML264	SEEDGWAS2156	2	LT	LT	90	95	6	14289	BOL	BOZM 0260	PISANK		NA	F			A			TARIJA	ARCE, SAN TELMO	-22.33	-64.26
24665	BOZM1168_14379	241495	(CML269/CML264)/BOZM1168_14379	242913	CML269/CML264	SEEDGWAS425	1	LT	LT	82	80	6	14379	BOL	BOZM 1168	CUBAAM		NA	F			B			BENI	BALLIVIAN, VILLAFATIMA	-14.19	-67.22
24774	VENE1000_14421	242007	(CML269/CML264)/VENE1000_14421	242913	CML269/CML264	SEEDGWAS936	1	LT	LT	69	82	8	14421	VEN	VENE 1000	CHANDE		NA	C			A	B	J	TRUJILLO	LA PENITA (DTO TRUJILLO)	9.25	-70.3
24803	VENE1011_14432	241496	(CML269/CML264)/VENE1011_14432	242913	CML269/CML264	SEEDGWAS426	2	LT	LT	89	90	6	14432	VEN	VENE 1011	PUYA		NA	C			B	J		MERIDA	MERIDA (A. ADRIANI)	8.45	-71.2
24816	VENE1014_14435	242009	(CML269/CML264)/VENE1014_14435	242913	CML269/CML264	SEEDGWAS938	1	LT	LT	84	82	6	14435	VEN	VENE 1014	CHANDE		NA	C			A	B	K	MIRANDA	OCUMARE DE TOY	10.07	-66.46
24820	VENEM_20_14442	241497	(CML495/CML494)/VENEM_20_14442	242919	CML495/CML494	SEEDGWAS427	1	LT	LT	95	97	6	14442	VEN	VENE M-20	TUXPEN		NA	C			B			BOLIVAR	CUBARRAL (DTO HERES)	7.04	-63.37
24822	ARZM03056_14599	242651	(CML495/CML494)/ARZM03056_14599	242919	CML495/CML494	SEEDGWAS1580	1	LT	LT	79	83	7	14599	ARG	ARZM 03 056	DENBLA		NA	C			A			ENTRE RIOS	COLONIA 21 CRUCECITA, NOGOYA	-39.24	-59.49
24941	BOZM710_14999	242011	(CML269/CML264)/BOZM710_14999	242913	CML269/CML264	SEEDGWAS940	1	LT	LT	75	85	5	14999	BOL	BOZM 0710	CUBAAM		NA	C			B	J		SANTA CRUZ	CHUIQUITOS, SOCHIZ ROBORE	-18.21	-59.43
24976	BRAZPE024_15411	238953	(CML269/CML264)/BRAZPE024_15411	242913	CML269/CML264	SEEDGWAS2159	2	LT	LT	94	96	6	15411	BRA	BRAZ PE024	DENTAD		NA	C			B	J		PERNAMBUCO	SERRA TALHADA-BARRA DE CABACA	-7.59	-38.18
24983	BRAZRN005_15441	242012	(CML269/CML264)/BRAZRN005_15441	242913	CML269/CML264	SEEDGWAS941	2	LT	LT	90	90	2	15441	BRA	BRAZ RN005	PIPOCA		NA	F			B	A		R. GRANDE NORTE	CAICO	-6.27	-37.06
25001	BRAZBA177_15477	238955	(CML269/CML264)/BRAZBA177_15477	242913	CML269/CML264	SEEDGWAS2161	2	LT	LT	90	92	6	15477	BRA	BRAZ BA177	DENTAD		NA	C			B			BAHIA	SANTA MARIA DA VICTORIA	-13.26	-44.09
25011	BRAZMG107_15482	241498	(CML269/CML264)/BRAZMG107_15482	242913	CML269/CML264	SEEDGWAS428	1	LT	LT	80	80	4	15482	BRA	BRAZ MG107	PIPOCA		NA	F			B					NA	NA
25014	BRAZMG040_15485	238956	(CML269/CML264)/BRAZMG040_15485	242913	CML269/CML264	SEEDGWAS2162	1	LT	LT	90	95	6	15485	BRA	BRAZ MG040	PIPOCA		NA	C	F		B	I		MINAS GERAIS	ARACUAI	-16.52	-42.04
25016	BRAZRN001_15488	238957	(CML269/CML264)/BRAZRN001_15488	242913	CML269/CML264	SEEDGWAS2163	2	LT	LT	95	96	6	15488	BRA	BRAZ RN001	DENTAD		NA	C			B			R. GRANDE NORTE	SERRA NEGRA DO NORTE-CURRAL QUEIMADO	-6.4	-37.24
25017	BRAZPA071_15502	240067	(CML269/CML264)/BRAZPA071_15502	242913	CML269/CML264	SEEDGWAS3273	1	LT	LT	105	111	8	15502	BRA	BRAZ PA071	DENTAD		NA	C			A			PARA	TUCURUI	-3.42	-49.44
25060	BRAZBA084_15531	238961	(CML269/CML264)/BRAZBA084_15531	242913	CML269/CML264	SEEDGWAS2167	1	LT	U	94	96	2	15531	BRA	BRAZ BA084	PIPOCA		NA	C			B	J		BAHIA	ITANHEM	-17.06	-40.21
25062	ARZM01031_15552	242013	(CML269/CML264)/ARZM01031_15552	242913	CML269/CML264	SEEDGWAS942	2	LT	LT	77	77	4	15552	ARG	ARZM 01 031	CRISCO		NA	F			F			BUENOS AIRES	RAMALLO, EL PARAISO	-33.34	-59.59
25067	ARZM01053_15558	242014	(CML269/CML264)/ARZM01053_15558	242913	CML269/CML264	SEEDGWAS943	2	LT	LT	76	75	4	15558	ARG	ARZM 01 053	CRISCO		NA	F			F			BUENOS AIRES	SAN PEDRO	-33.4	-59.4
25070	ARZM05003_15579	238962	(CML495/CML494)/ARZM05003_15579	242919	CML495/CML494	SEEDGWAS2168	2	LT	LT	95	97	6	15579	ARG	ARZM 05 003	PERLIT		NA	F			A	J		MISIONES	LEANDRO N. ALEM	-27.36	-55.19
25073	ARZM07049_15585	238964	(CML269/CML264)/ARZM07049_15585	242913	CML269/CML264	SEEDGWAS2170	1	LT	LT	96	100	6	15585	ARG	ARZM 07 049	PERLIT		NA	F			B			FORMOSA	EL PARAISO, PILCOMAYO	-25	-60
25106	CUBAT_9_15668	241500	(CML269/CML264)/CUBAT_9_15668	242913	CML269/CML264	SEEDGWAS430	2	LT	LT	87	90	6	15668	CUB	CUBA T-9			NA	F			B				CONTRAMAESTRE	20.18	-76.13
25115	CUBAT_23_15678	242016	(CML451/CML486)/CUBAT_23_15678	242916	CML451/CML486	SEEDGWAS945	1	LT	LT	90	88	6	15678	CUB	CUBA T-23			NA	C			B			HOLGUIN	EL CAFETAL	20.54	-76.15
25132	CUBAT_25_15680	242018	(CML269/CML264)/CUBAT_25_15680	242913	CML269/CML264	SEEDGWAS947	2	LT	LT	88	87	6	15680	CUB	CUBA T-25			NA	F			B	J			RANCHUELO	22.23	-80.09
25137	CUBAI_42_15692	242020	(CML269/CML264)/CUBAI_42_15692	242913	CML269/CML264	SEEDGWAS949	2	LT	LT	88	85	6	15692	CUB	CUBA I-42			NA	C			B				BARRIO VICENTE	21.62	-79.54
25201	CUBAI_72_15717	242023	(CML269/CML264)/CUBAI_72_15717	242913	CML269/CML264	SEEDGWAS952	1	LT	LT	89	81	8	15717	CUB	CUBA I-72			NA	F			B	J		MATANZAS	BARRIO LOPEZ	23.03	-81.34
25216	HAIT304_15755	242024	(CML269/CML264)/HAIT304_15755	242913	CML269/CML264	SEEDGWAS953	2	LT	LT	85	84	6	15755	HTI	HAIT 304			NA	C			B			HAITI		18.99	-72.92
25220	CHIS44_15874	241501	(CML495/CML494)/CHIS44_15874	242919	CML495/CML494	SEEDGWAS431	1	LT	LT	91	93	6	15874	MEX	CHIS 44			NA	C			B	A			TUXTLA GUTIERREZ	16.45	-93.07
25253	SNLP146_15974	242026	(CML269/CML264)/SNLP146_15974	242913	CML269/CML264	SEEDGWAS955	1	LT	LT	77	80	8	15974	MEX	SNLP 146	TUXPEN		NA	C			A	B			RAYON	21.5	-99.39
25355	HAIT6_16141	242027	(CML269/CML264)/HAIT6_16141	242913	CML269/CML264	SEEDGWAS956	2	LT	LT	96	97	6	16141	HTI	HAIT 6	HAITYE		NA	F			B	J			MORON	18.84	-73.15
25356	HAIT10_16143	241503	(CML269/CML264)/HAIT10_16143	242913	CML269/CML264	SEEDGWAS433	2	LT	LT	90	90	2	16143	HTI	HAIT 10	CHANDE		NA	F			B				CARTACHES	18.85	-73.08
25413	RDOM7_16218	242029	(CML269/CML264)/RDOM7_16218	242913	CML269/CML264	SEEDGWAS958	2	LT	LT	84	83	6	16218	DOM	RDOM 7			NA	C			B	J		SANTIAGO	HATO DEL YAQUE	19.3	-71.05
25438	DURA131_16257	238968	(CML269/CML264)/DURA131_16257	242913	CML269/CML264	SEEDGWAS2174	1	LT	ST	79	82	1	16257	MEX	DURA 131			NA	C	F		A	J	B	TAMAZULA	LA GARROCHA DELEGACION LOS REMEDIOS	24.38	-106.23
25439	GUER110_16260	238969	(CML269/CML264)/GUER110_16260	242913	CML269/CML264	SEEDGWAS2175	2	LT	LT	95	98	6	16260	MEX	GUER 110			NA	C			K	A	J		VALLECITO	17.97	-101.6
25444	CHIS432_16284	242032	(CML269/CML264)/CHIS432_16284	242913	CML269/CML264	SEEDGWAS961	2	LT	LT	92	92	6	16284	MEX	CHIS 432	OLOTIL	TUXPEN	NA	C			B	J			VENUSTIANO CARRANZA	16.2	-92.34
25501	PUEB51_16495	241506	(CML269/CML264)/PUEB51_16495	242913	CML269/CML264	SEEDGWAS436	1	LT	LT	85	83	6	16495	MEX	PUEB 51			NA	C			B	A			SAN JOSE ACATENO	20.08	-97.12
25613	VENEM_42_16732	242034	(CML269/CML264)/VENEM_42_16732	242913	CML269/CML264	SEEDGWAS963	1	LT	LT	92	93	6	16732	VEN	VENE M-42			NA	F			B			BOLIVAR	LA MANGA (MARIA EULALIA)	6.57	-63.2
25719	BRAZ312_16951	240792	(CML269/CML264)/BRAZ312_16951	242913	CML269/CML264	SEEDGWAS3995	1	LT	LT	86	86	5	16951	BRA	BRAZ 312			NA	C			B			RIO GRANDE DO SUL	PELOTAS	-31.46	-52.2
25743	GREN313_17025	242037	(CML269/CML264)/GREN313_17025	242913	CML269/CML264	SEEDGWAS966	1	LT	LT	86	86	5	17025	GRD	GREN 313			NA	F	C		B			GRENADA		12.23	-61.6
25754	TRIN315_17098	242038	(CML269/CML264)/TRIN315_17098	242913	CML269/CML264	SEEDGWAS967	1	LT	LT	92	90	6	17098	TTO	TRIN 315			NA	C			B			TRINIDAD		10.47	-61.26
25785	BOZM1427_17763	241507	(CML269/CML264)/BOZM1427_17763	242913	CML269/CML264	SEEDGWAS437	1	LT	LT	77	74	6	17763	BOL	BOZM 1427	CUBAAM		NA	C			B	J		TARIJA	GRAN CHACO, SAN ANTONIO	-21.22	-63.34
25786	VENEM_94_17770	241508	(CML495/CML494)/VENEM_94_17770	242919	CML495/CML494	SEEDGWAS438	1	LT	LT	92	88	6	17770	VEN	VENE M-94	TUXPEN		NA	C			B			BOLIVAR	MANGANESO (DTO. PIAR)	8	-62.07
25799	VENEM_277_17786	241509	(CML269/CML264)/VENEM_277_17786	242913	CML269/CML264	SEEDGWAS439	1	LT	LT	97	99	6	17786	VEN	VENE M-277			NA	A			A	B	K		VENEZUELA	8	-66
25802	VENEM_311_17787	241510	(CML495/CML494)/VENEM_311_17787	242919	CML495/CML494	SEEDGWAS440	1	LT	LT	96	95	6	17787	VEN	VENE M-311			NA	F			B				VENEZUELA	8	-66
25804	VENEM_325_17788	242044	(CML269/CML264)/VENEM_325_17788	242913	CML269/CML264	SEEDGWAS973	1	LT	LT	90	92	6	17788	VEN	VENE M-325			NA	F			A				VENEZUELA	8	-66
25824	CHIS49_17806	241511	(CML269/CML264)/CHIS49_17806	242913	CML269/CML264	SEEDGWAS441	2	LT	LT	90	89	2	17806	MEX	CHIS 49			NA	C			B				TUXTLA GUTIERREZ	16.45	-93.07
25832	CHIS72_17810	241512	(CML495/CML494)/CHIS72_17810	242919	CML495/CML494	SEEDGWAS442	1	LT	LT	80	80	4	17810	MEX	CHIS 72	OLOTIL		NA	C			A	B			ACALA	16.34	-92.49
25843	GUER38_17832	242703	(CML269/CML264)/GUER38_17832	242913	CML269/CML264	SEEDGWAS1632	2	LT	LT	69	68	1	17832	MEX	GUER 38			NA	C			A	J			COYUCA DE CATALAN	18.18	-100.42
25845	HIDA31_17835	242046	(CML269/CML264)/HIDA31_17835	242913	CML269/CML264	SEEDGWAS975	1	LT	LT	105	105	3	17835	MEX	HIDA 31	TUXPEN		NA	C			A	B			HUEJUTLA DE HIDALGO	21.09	-98.25
25902	SNLP35_17898	242712	(CML373/CML311)/SNLP35_17898	242914	CML373/CML311	SEEDGWAS1641	2	LT	ST	82	83	1	17898	MEX	SNLP 35			NA	C			B	I	A		COXCATLAN	21.32	-98.53
25932	TAMA11_17930	238971	(CML269/CML264)/TAMA11_17930	242913	CML269/CML264	SEEDGWAS2177	1	LT	LT	85	87	4	17930	MEX	TAMA 11			NA	C			A	I	B	NUEVO PADILLA	EL BARRETAL	24.05	-99.06
25933	TAMA12_17931	240794	(CML269/CML264)/TAMA12_17931	242913	CML269/CML264	SEEDGWAS3997	1	LT	LT	85	91	8	17931	MEX	TAMA 12			NA	C			A	B	K	NUEVO PADILLA	EL BARRETAL	24.05	-99.06
26111	CUBAI_66_18183	242050	(CML451/CML486)/CUBAI_66_18183	242916	CML451/CML486	SEEDGWAS979	1	LT	LT	87	87	6	18183	CUB	CUBA I-66			NA	F			B	I			SANCTI SPIRITUS-BANAO	21.82	-79.56
26178	BRAZBA057_18315	242053	(CML451/CML486)/BRAZBA057_18315	242916	CML451/CML486	SEEDGWAS982	1	LT	LT	80	80	4	18315	BRA	BRAZ BA057	PIPOCA		NA	F			A			BAHIA	EUCLIDES DA CUNHA	-10.31	-39.01
26238	CHIS788_18343	238975	(CML269/CML264)/CHIS788_18343	242913	CML269/CML264	SEEDGWAS2181	1	LT	LT	93	97	6	18343	MEX	CHIS 788			NA	C			A	B		CINTALAPA	NUEVO TENOCHITLAN	16.7	-93.72
26337	MICH150_18516	242207	(CML373/CML311)/MICH150_18516	242914	CML373/CML311	SEEDGWAS1136	2	ST	ST	84	91	1	18516	MEX	MICH 150	OLOTIL		NA	C			A	B		COALCOMAN	LA GUADALUPE	18.47	-103.09
26345	MORE71_18538	242054	(CML269/CML264)/MORE71_18538	242913	CML269/CML264	SEEDGWAS983	1	LT	LT	71	68	8	18538	MEX	MORE 71	TUXPEN	ANCHO	NA	C			B	A			MAZATEPEC	18.54,18.43	-99.1,-99.22
26495	MICH190_18872	242056	(CML269/CML264)/MICH190_18872	242913	CML269/CML264	SEEDGWAS985	2	LT	LT	77	80	8	18872	MEX	MICH 190			NA	C			J	B	K		TEPALCATEPEC	19.11	-102.5
26515	QROO27_18899	242057	(CML451/CML486)/QROO27_18899	242916	CML451/CML486	SEEDGWAS986	1	LT	LT	88	90	6	18899	MEX	QROO 27	DZITBA		NA	F			B	I			ISLA MUJERES	21.12	-86.43
26516	QROO28_18900	242729	(CML495/CML494)/QROO28_18900	242919	CML495/CML494	SEEDGWAS1658	2	LT	LT	80	80	4	18900	MEX	QROO 28	DZITBA		NA	F			B	I	A		ISLA MUJERES	21.12	-86.43
26571	TAMA55_18917	242730	(CML269/CML264)/TAMA55_18917	242913	CML269/CML264	SEEDGWAS1659	1	LT	LT	90	90	2	18917	MEX	TAMA 55	TUXPEN		NA	C			A					NA	NA
26578	VERA115_18924	238979	(CML269/CML264)/VERA115_18924	242913	CML269/CML264	SEEDGWAS2185	1	LT	LT	96	105	8	18924	MEX	VERA 115	TUXPEN	OLOTIL	NA	C			K				IXTACZOQUITLAN	18.51	-97.04
26580	VERA234_18926	242058	(CML451/CML486)/VERA234_18926	242916	CML451/CML486	SEEDGWAS987	2	LT	LT	88	86	6	18926	MEX	VERA 234			NA	C			A				TEMPOAL	21.31	-98.23
26587	YUCA42_18931	241517	(CML269/CML264)/YUCA42_18931	242913	CML269/CML264	SEEDGWAS447	2	LT	LT	92	92	6	18931	MEX	YUCA 42			NA	C			A				MUNA	20.29	-89.44
26618	PAZM10087_19064	238980	(CML269/CML264)/PAZM10087_19064	242913	CML269/CML264	SEEDGWAS2186	1	LT	LT	97	105	8	19064	PRY	PAZM 10087	SAPEMO		NA	A			B			ALTO PARANA	ITAKYRY	-24.56	-55.13
26622	PAZM14026_19083	240086	(CML269/CML264)/PAZM14026_19083	242913	CML269/CML264	SEEDGWAS3292	2	LT	LT	99	100	6	19083	PRY	PAZM 14026	SAPEPY		NA	C	F		B	J		CANENDIYU	TRONCAL 3	-25	-55
26693	BRAZPA099_19107	238984	(CML269/CML264)/BRAZPA099_19107	242913	CML269/CML264	SEEDGWAS2190	1	LT	LT	97	97	6	19107	BRA	BRAZ PA099			NA	F	C		B	J		PARA		-5.62	-52.49
26755	ARZM01083_19153	240089	(CML495/CML494)/ARZM01083_19153	242919	CML495/CML494	SEEDGWAS3295	1	LT	LT	96	100	6	19153	ARG	ARZM 01 083	CRISCO		NA	F			F			BUENOS AIRES	TORNQUIST, NUEVA ROMA	-38.06	-62.14
26776	ARZM07107_19180	241523	(CML269/CML264)/ARZM07107_19180	242913	CML269/CML264	SEEDGWAS453	1	LT	LT	80	79	4	19180	ARG	ARZM 07 107	TUSON		NA	C	F		B	A	K	FORMOSA	COLONIA EL ALBA, PIRANE	-25	-60
26809	ARZM08178_19189	238988	(CML269/CML264)/ARZM08178_19189	242913	CML269/CML264	SEEDGWAS2194	1	LT	LT	83	85	4	19189	ARG	ARZM 08 178	DENBLA		NA	C			A	B		SALTA	VALLECITO	-25	-64.3
26818	ARZM12241_19202	238989	(CML269/CML264)/ARZM12241_19202	242913	CML269/CML264	SEEDGWAS2195	1	LT	LT	92	94	6	19202	ARG	ARZM 12 241	DENBLA		NA	C	F		A	B	J	CATAMARCA	POMAN	-28.23	-66.12
26819	ARZM13106_19203	238990	(CML269/CML264)/ARZM13106_19203	242913	CML269/CML264	SEEDGWAS2196	2	LT	LT	90	91	6	19203	ARG	ARZM 13 106	DENBLA		NA	C			A	B		LA RIOJA	BELLVISTA, GDOR. GORDILLO	-30.3	-66.16
26826	ARZM16045_19217	238991	(CML269/CML264)/ARZM16045_19217	242913	CML269/CML264	SEEDGWAS2197	2	LT	LT	84	85	4	19217	ARG	ARZM 16 045	DENBLA		NA	C			A	B		MENDOZA	SAN CARLOS, EUGENIO BUSTOS	-33.47	-69.03
26969	VENE883_19817	242070	(CML269/CML264)/VENE883_19817	242913	CML269/CML264	SEEDGWAS999	2	LT	LT	92	92	6	19817	VEN	VENE 883	CHIRIM		NA	C			A			LARA	TUNERE	10.1	-69.5
27046	PUEB814_19987	241526	(CML269/CML264)/PUEB814_19987	242913	CML269/CML264	SEEDGWAS456	2	LT	LT	97	101	6	19987	MEX	PUEB 814	ARROAM	MUSHIT	NA	C			B	A			ZACAPOAXTLA	19.52	-97.35
27102	QROO40_20378	241528	(CML495/CML494)/QROO40_20378	242919	CML495/CML494	SEEDGWAS458	1	LT	LT	88	90	6	20378	MEX	QROO 40	TUXPEN		NA	C	L		A	J	B		FELIPE CARRILLO PUERTO	19.35	-88.03
27107	GUER104_20386	242736	(CML495/CML494)/GUER104_20386	242919	CML495/CML494	SEEDGWAS1665	2	LT	LT	92	96	6	20386	MEX	GUER 104			NA	F			K	A		PETATLAN	MESA DEL PALMAR	17.32	-101.17
27110	VERA240_20401	242075	(CML269/CML264)/VERA240_20401	242913	CML269/CML264	SEEDGWAS1004	1	LT	LT	92	97	6	20401	MEX	VERA 240			NA	C			A	B			TUXPAM	20.95	-97.4
27124	VERA253_20417	242737	(CML495/CML494)/VERA253_20417	242919	CML495/CML494	SEEDGWAS1666	2	LT	LT	90	90	2	20417	MEX	VERA 253	TUXPEN		NA	C			A	K			SAN JUAN EVANGELISTA	17.53	-95.08
27137	YUCA29_20434	242739	(CML495/CML494)/YUCA29_20434	242919	CML495/CML494	SEEDGWAS1668	2	LT	LT	92	92	6	20434	MEX	YUCA 29			NA	C			A			SANTA ELENA	RUINAS DE CABAH	20.18	-89.39
27248	PUEB745_20817	241529	(CML269/CML264)/PUEB745_20817	242913	CML269/CML264	SEEDGWAS459	1	LT	LT	76	74	4	20817	MEX	PUEB 745	ARROAM		NA	C			A	J	B		ATEMPAN	19.5	-97.27
27299	PUEB746_20947	241530	(CML495/CML494)/PUEB746_20947	242919	CML495/CML494	SEEDGWAS460	1	LT	LT	87	94	8	20947	MEX	PUEB 746	ARROAM	MUSHIT	NA	A	C		I	K	J		ATEMPAN	19.5	-97.27
27502	MICH408_21369	241531	(CML269/CML264)/MICH408_21369	242913	CML269/CML264	SEEDGWAS461	2	LT	LT	87	87	6	21369	MEX	MICH 408			NA	C			A	B	J		ARTEAGA	18.17	-102.1
27511	PAZM4033_21448	238998	(CML269/CML264)/PAZM4033_21448	242913	CML269/CML264	SEEDGWAS2204	2	LT	U	105	104	1	21448	PRY	PAZM 04033	AVMORO		NA							GUAIRA	INDEPENDENCIA, YROISA 9oL.	-25.48	-56.06
27561	PAZM8076_21584	239001	(CML269/CML264)/PAZM8076_21584	242913	CML269/CML264	SEEDGWAS2207	1	LT	LT	111	110	8	21584	PRY	PAZM 08076	TUPIMO		NA	A	F	C	A	B		MISIONES	SANTA MARIA, CURUPAYTY	-27	-57.16
27563	PAZM8078_21586	239002	(CML269/CML264)/PAZM8078_21586	242913	CML269/CML264	SEEDGWAS2208	1	LT	LT	106	109	3	21586	PRY	PAZM 08078	TUPIMO		NA	F	A	C	A	B		MISIONES	SANTA ROSA, YCUA SATI	-26.52	-57.16
27602	PAZM14106_21714	240812	(CML269/CML264)/PAZM14106_21714	242913	CML269/CML264	SEEDGWAS4015	1	LT	LT	97	102	6	21714	PRY	PAZM 14106	TUPIMO		NA	F			A			CANENDIYU	FRANCISCO CABALLERO ALVAREZ, SAN JUAN	-24.07	-54.47
27618	BRAZBA096_21865	239010	(CML269/CML264)/BRAZBA096_21865	242913	CML269/CML264	SEEDGWAS2216	2	LT	LT	89	95	6	21865	BRA	BRAZ BA096			NA	C	F		B	J		BAHIA	TEIXEIRA DE FREITAS	-17.6	-39.68
27635	BRAZBA186_21880	239013	(CML269/CML264)/BRAZBA186_21880	242913	CML269/CML264	SEEDGWAS2219	2	LT	LT	91	99	8	21880	BRA	BRAZ BA186	DENTAD		NA	C			B	J		BAHIA	SANTA MARIA DA VITORIA	-13.26	-44.09
27638	BRAZCE001_21886	239016	(CML269/CML264)/BRAZCE001_21886	242913	CML269/CML264	SEEDGWAS2222	2	LT	LT	89	91	6	21886	BRA	BRAZ CE001			NA	C	F		B	J		CEARA	LIMOEIRO DO NORTE-KM 60-CHAPADA DO APODI	-5.08	-38.05
27658	BRAZMG081_21947	239404	(CML269/CML264)/BRAZMG081_21947	242913	CML269/CML264	SEEDGWAS2610	2	ST	LT	112	114	1	21947	BRA	BRAZ MG081	DENTAD		NA	C			B			MINAS GERAIS	CASSITERITA	-21.14	-44.48
27665	BRAZMS020_21966	239027	(CML269/CML264)/BRAZMS020_21966	242913	CML269/CML264	SEEDGWAS2233	2	LT	LT	91	95	6	21966	BRA	BRAZ MS020	DENTAD		NA	C			B	J	A	MATO GROSSO DO SUL	AMAMBAI-MOROTI	-23.05	-55.13
27678	BRAZPR029_21998	239409	(CML373/CML311)/BRAZPR029_21998	242914	CML373/CML311	SEEDGWAS2615	1	ST	ST	100	100	5	21998	BRA	BRAZ PR029	DENTAD		NA	C			B	J		PARANA	MEDIANEIRA-LINHA FARROUPILHA	-25.15	-54.05
27681	BRAZPR053_22013	239034	(CML269/CML264)/BRAZPR053_22013	242913	CML269/CML264	SEEDGWAS2240	1	LT	LT	89	89	6	22013	BRA	BRAZ PR053			NA	C			B	J	A	PARANA	PORTO CAMARGO	-23.25	-53.45
27683	BRAZSC009_22019	239410	(CML373/CML311)/BRAZSC009_22019	242914	CML373/CML311	SEEDGWAS2616	1	ST	ST	100	99	5	22019	BRA	BRAZ SC009			NA	C			D	A		SANTA CATARINA	AGUAS DE CHAPECO`-LINHA GAVIO	-27.33	-51.02
27710	VENEM_074_22078	242742	(CML495/CML494)/VENEM_074_22078	242919	CML495/CML494	SEEDGWAS1671	1	LT	LT	88	90	6	22078	VEN	VENE M-074			NA	A			A			BOLIVAR	LOS ROSOS (SECTOR SUCUTUN)	8	-62.26
27713	VENEM_212_22081	242078	(CML269/CML264)/VENEM_212_22081	242913	CML269/CML264	SEEDGWAS1007	2	LT	LT	92	92	6	22081	VEN	VENE M-212			NA	C			B	J		T.F. AMAZONAS	LOS MANCALES, SIERRA IMATACA	8.26	-62.28
27719	PAZM2035_22746	239035	(CML269/CML264)/PAZM2035_22746	242913	CML269/CML264	SEEDGWAS2241	1	LT	LT	109	NA	NA	22746	PRY	PAZM 02035	AVMORO		NA							SAN PEDRO	GRAL. ELIZARDO AQUINO, BARRIO NINO JESUS	-24.22	-56.38
27816	TOLI363_23018	241535	(CML451/CML486)/TOLI363_23018	242916	CML451/CML486	SEEDGWAS465	1	LT	LT	89	82	8	23018	COL	TOLI 363	COSTEN9		9	F			B	A		SAN LUIS		6	-74.96
27820	TOLI401_23029	241536	(CML269/CML264)/TOLI401_23029	242913	CML269/CML264	SEEDGWAS466	1	LT	LT	83	86	4	23029	COL	TOLI 401	COSTEN9		9	F			B			SAN LUIS		6	-74.96
27839	QROO53_23172	242080	(CML451/CML486)/QROO53_23172	242916	CML451/CML486	SEEDGWAS1009	1	LT	LT	87	83	6	23172	MEX	QROO 53	TUXPEN	NALTEL	NA	C			B	J	I	FELIPE CARRILLO PUERTO	SANTA CRUZ A 35 KM. DE DZULA A SUR SELVA DENT	19.35	-88.03
27908	CHIS423_23203	242082	(CML269/CML264)/CHIS423_23203	242913	CML269/CML264	SEEDGWAS1011	2	LT	LT	89	90	6	23203	MEX	CHIS 423	OLOTIL	TUXPEN	NA	C			A	B			VENUSTIANO CARRANZA	16.2	-92.34
27915	CHIS434_23208	242083	(CML451/CML486)/CHIS434_23208	242916	CML451/CML486	SEEDGWAS1012	1	LT	LT	88	88	6	23208	MEX	CHIS 434	OLOTIL	TUXPEN	NA	C			K	A			VENUSTIANO CARRANZA	16.2	-92.34
27930	CHIS404_23213	241537	(CML269/CML264)/CHIS404_23213	242913	CML269/CML264	SEEDGWAS467	2	LT	LT	83	83	4	23213	MEX	CHIS 404	TEPECI		NA	C			B	J			VENUSTIANO CARRANZA	16.2	-92.34
27993	VERA271_23246	242085	(CML451/CML486)/VERA271_23246	242916	CML451/CML486	SEEDGWAS1014	1	LT	LT	88	87	6	23246	MEX	VERA 271			NA	C			A				TEMPOAL	21.31	-98.23
28020	CHIS431_23267	242754	(CML495/CML494)/CHIS431_23267	242919	CML495/CML494	SEEDGWAS1683	1	LT	LT	87	90	6	23267	MEX	CHIS 431	TUXPEN		NA	C			A	B			VENUSTIANO CARRANZA	16.2	-92.34
28192	PUEB779_23409	241539	(CML269/CML264)/PUEB779_23409	242913	CML269/CML264	SEEDGWAS469	2	LT	LT	86	75	8	23409	MEX	PUEB 779	ARROAM		NA								CHIGNAUTLA	19.49	-97.22
28205	OAXA506_23419	239419	(CML495/CML494)/OAXA506_23419	242919	CML495/CML494	SEEDGWAS2625	2	ST	LT	89	106	2	23419	MEX	OAXA 506			NA							SANTA MARIA TLAXIACO	SAN NICOLAS	17.16	-97.41
28278	PUEB777_23520	241541	(CML269/CML264)/PUEB777_23520	242913	CML269/CML264	SEEDGWAS471	2	LT	LT	82	83	4	23520	MEX	PUEB 777	ARROAM		NA								CHIGNAUTLA	19.49	-97.22
28307	OAXA856_23552	241545	(CML269/CML264)/OAXA856_23552	242913	CML269/CML264	SEEDGWAS475	1	LT	LT	74	75	1	23552	MEX	OAXA 856	ZAPGRA		NA				A			JUCHITAN	CHAHUITES	16.17	-94.11
28318	OAXA889_23585	242088	(CML269/CML264)/OAXA889_23585	242913	CML269/CML264	SEEDGWAS1017	1	LT	LT	69	68	1	23585	MEX	OAXA 889	ZAPCHI		NA				A			JUCHITAN	COLONIA SANTA ROSITA	16.26	-95.01
28325	OAXA907_23603	242757	(CML269/CML264)/OAXA907_23603	242913	CML269/CML264	SEEDGWAS1686	2	LT	LT	62	62	1	23603	MEX	OAXA 907	ZAPCHI		NA				A			NEJAPA DE MADERO	EL CAMARON	16.33	-96.02
28334	OAXA908_23604	239043	(CML269/CML264)/OAXA908_23604	242913	CML269/CML264	SEEDGWAS2249	2	LT	LT	90	94	6	23604	MEX	OAXA 908	ZAPCHI		NA				A			NEJAPA DE MADERO	EL CAMARON	16.33	-96.02
28351	SNLP116_23627	241547	(CML269/CML264)/SNLP116_23627	242913	CML269/CML264	SEEDGWAS477	1	LT	LT	82	83	4	23627	MEX	SNLP 116	TUXPEN	DZITBA	NA								TAMPACAN	21.24	-98.43
28465	TAMA135_24023	239044	(CML269/CML264)/TAMA135_24023	242913	CML269/CML264	SEEDGWAS2250	2	LT	LT	89	88	6	24023	MEX	TAMA 135			NA	E	C		A	B			OCAMPO	22.83	-99.32
28474	GUER195_24284	241548	(CML269/CML264)/GUER195_24284	242913	CML269/CML264	SEEDGWAS478	2	LT	LT	83	83	4	24284	MEX	GUER 195	REVENT	VANDEN	NA	F			A	B			LA UNION	17.58	-101.4
28487	CHIS725_24297	242093	(CML269/CML264)/CHIS725_24297	242913	CML269/CML264	SEEDGWAS1022	2	LT	LT	93	89	6	24297	MEX	CHIS 725			NA	C			C			CHIAPA DE CORZO	RIVERA DE CUPIA	16.43	-93
28492	CHIS471_24307	242095	(CML373/CML311)/CHIS471_24307	242914	CML373/CML311	SEEDGWAS1024	1	LT	LT	91	92	6	24307	MEX	CHIS 471	TUXPEN		NA	C			C	A			VILLA CORZO	16.12	-63.16
28508	YUCA112_24312	241549	(CML269/CML264)/YUCA112_24312	242913	CML269/CML264	SEEDGWAS479	1	LT	LT	91	93	6	24312	MEX	YUCA 112			NA	F			B				TAHMEK	20.53	-89.15
28515	QROO64_24323	241550	(CML269/CML264)/QROO64_24323	242913	CML269/CML264	SEEDGWAS480	1	LT	LT	95	96	6	24323	MEX	QROO 64	DZITBA		NA	C			C			FELIPE CARRILLO PUERTO	BULUCAX	19.35	-88.03
28520	QROO127_24324	241551	(CML495/CML494)/QROO127_24324	242919	CML495/CML494	SEEDGWAS481	1	LT	LT	92	95	6	24324	MEX	QROO 127	TUXPEN	DZITBA	NA	C			C			OTHEN F. BLANCO	EJIDO AVILA CAMACHO	19.37	-89
28530	PUEB177_24345	241552	(CML269/CML264)/PUEB177_24345	242913	CML269/CML264	SEEDGWAS482	2	LT	LT	90	91	6	24345	MEX	PUEB 177	TUXPEN		NA	C			C			CUETZALA	ZOQUITA	20.02	-97.27
28537	CHIS466_24375	242096	(CML373/CML311)/CHIS466_24375	242914	CML373/CML311	SEEDGWAS1025	1	LT	LT	90	89	2	24375	MEX	CHIS 466	TUXPEN		NA	C			C				ACALA	16.34	-92.49
28540	QROO59_24385	241554	(CML269/CML264)/QROO59_24385	242913	CML269/CML264	SEEDGWAS484	1	LT	LT	88	93	6	24385	MEX	QROO 59	TUXPEN	DZITBA	NA	C			C			JOSE MARIA MORELOS	RANCHO GUADALUPE EJIDO KM.50	19.35	-88.03
28541	ARZM01094_24396	239045	(CML269/CML264)/ARZM01094_24396	242913	CML269/CML264	SEEDGWAS2251	2	LT	LT	81	83	4	24396	ARG	ARZM 01 094	CRISCO		NA							BUENOS AIRES	CORONEL SUAREZ	-37.28	-61.55
28548	ARZM04097_24422	241555	(CML495/CML494)/ARZM04097_24422	242919	CML495/CML494	SEEDGWAS485	1	LT	LT	86	86	5	24422	ARG	ARZM 04 097	AVMORO		NA							CORRIENTES	CORRIENTES	-27.28	-58.5
28570	ARZM06043_24438	241557	(CML495/CML494)/ARZM06043_24438	242919	CML495/CML494	SEEDGWAS487	1	LT	LT	88	90	6	24438	ARG	ARZM 06 043	CRAMAN		NA							CHACO	PCIA. R. SAENZ PENA, COMANDANTE FERNANDEZ	-26.47	-60.27
28577	ARZM06088_24444	239048	(CML269/CML264)/ARZM06088_24444	242913	CML269/CML264	SEEDGWAS2254	2	LT	LT	77	79	1	24444	ARG	ARZM 06 088	PISING		NA							CHACO	PINEDO, 12 DE OCTUBRE	-27.13	-61.12
28593	ARZM07043_24453	241559	(CML269/CML264)/ARZM07043_24453	242913	CML269/CML264	SEEDGWAS489	2	LT	LT	86	86	5	24453	ARG	ARZM 07 043	CRAMAN		NA							FORMOSA	SANTA ROSA, PILAGAS	-23.47	-61.29
28595	ARZM07073_24456	241560	(CML269/CML264)/ARZM07073_24456	242913	CML269/CML264	SEEDGWAS490	1	LT	LT	82	84	4	24456	ARG	ARZM 07 073	AVMORO		NA							FORMOSA	GENERAL J. C. SANCHEZ, PILCOMAYO	-25.22	-58.14
28596	ARZM07094_24462	239049	(CML269/CML264)/ARZM07094_24462	242913	CML269/CML264	SEEDGWAS2255	1	LT	LT	89	91	6	24462	ARG	ARZM 07 094	AVMORO		NA							FORMOSA	EL OLVIDO, PIRANE	-25	-60
28597	ARZM07098_24464	241561	(CML269/CML264)/ARZM07098_24464	242913	CML269/CML264	SEEDGWAS491	NA	LT	LT	84	85	4	24464	ARG	ARZM 07 098	AVMORO		NA							FORMOSA	SOLDADO TOMAS SANCHEZ, PIRANE	-25	-60
28616	ARZM17014_24529	240135	(CML269/CML264)/ARZM17014_24529	242913	CML269/CML264	SEEDGWAS3341	1	LT	LT	93	96	6	24529	ARG	ARZM 17 014	CRISCO		NA							SAN LUIS	BARRANCAS COLORADAS	-33.15	-66.22
28698	VERA646_24643	239050	(CML269/CML264)/VERA646_24643	242913	CML269/CML264	SEEDGWAS2256	1	LT	LT	97	101	6	24643	MEX	VERA 646			NA								LANDERO Y COSS	19.44	-96.51
28702	VERA648_24644	241562	(CML269/CML264)/VERA648_24644	242913	CML269/CML264	SEEDGWAS492	1	LT	LT	82	92	8	24644	MEX	VERA 648			NA								LANDERO Y COSS	19.44	-96.51
28780	GUER214_24758	239051	(CML269/CML264)/GUER214_24758	242913	CML269/CML264	SEEDGWAS2257	1	LT	LT	95	100	6	24758	MEX	GUER 214	ELOTOC		NA								ZIHUATANEJO	17.39	-101.3
28788	SNLP117_24795	241563	(CML269/CML264)/SNLP117_24795	242913	CML269/CML264	SEEDGWAS493	1	LT	LT	81	89	8	24795	MEX	SNLP 117	TUXPEN		NA							XILITLA	SOLEDAD ZARAGOZA	21.24	-98.59
28802	BOZM1607_24808	241564	(CML269/CML264)/BOZM1607_24808	242913	CML269/CML264	SEEDGWAS494	2	LT	LT	80	76	6	24808	BOL	BOZM 1607	CUBANO		NA									NA	NA
28803	BOZM1702_24813	241565	(CML269/CML264)/BOZM1702_24813	242913	CML269/CML264	SEEDGWAS495	2	LT	LT	83	85	4	24813	BOL	BOZM 1702	CUBAAM		NA									NA	NA
28805	BOZM1633_24821	241566	(CML269/CML264)/BOZM1633_24821	242913	CML269/CML264	SEEDGWAS496	2	LT	LT	80	81	4	24821	BOL	BOZM 1633	CUBAAM		NA									NA	NA
28806	BOZM1631_24823	241567	(CML269/CML264)/BOZM1631_24823	242913	CML269/CML264	SEEDGWAS497	2	LT	LT	77	76	4	24823	BOL	BOZM 1631	CUBAAM		NA									NA	NA
28817	BOZM1634_24835	241569	(CML269/CML264)/BOZM1634_24835	242913	CML269/CML264	SEEDGWAS499	2	LT	LT	76	74	4	24835	BOL	BOZM 1634	CUBAAM		NA									NA	NA
28825	CHIS526_24953	242100	(CML269/CML264)/CHIS526_24953	242913	CML269/CML264	SEEDGWAS1029	1	LT	LT	72	73	1	24953	MEX	CHIS 526	ZAPGRA		NA								CINTALAPA	16.42	-93.43
28830	TAMA98_24957	241570	(CML269/CML264)/TAMA98_24957	242913	CML269/CML264	SEEDGWAS500	1	LT	LT	83	79	6	24957	MEX	TAMA 98			NA								TAMPICO	22.25	-97.86
28836	NAYA245_24962	242775	(CML269/CML264)/NAYA245_24962	242913	CML269/CML264	SEEDGWAS1704	2	LT	LT	67	71	8	24962	MEX	NAYA 245	TABLON	TUXPEN	NA							LAS NORAS	COMUNIDAD SANTA ROSA	21.4	-104.5
28841	GUER216_24974	242776	(CML269/CML264)/GUER216_24974	242913	CML269/CML264	SEEDGWAS1705	1	LT	LT	68	68	1	24974	MEX	GUER 216	VANDEN	OLOTIL	NA							LA UNION	SANTA MARIA	18.07	-102
28842	TAMA94_24979	241571	(CML269/CML264)/TAMA94_24979	242913	CML269/CML264	SEEDGWAS501	1	LT	LT	90	89	2	24979	MEX	TAMA 94			NA								LLERA DE CANALES	23.18	-99.01
28844	QROO79_24980	241572	(CML495/CML494)/QROO79_24980	242919	CML495/CML494	SEEDGWAS502	2	LT	LT	90	89	2	24980	MEX	QROO 79	TUXPEN	NALTEL	NA							FELIPE CARRILLO PUERTO	PUERTO ARTURO	19.35	-88.03
28849	QROO78_24989	241573	(CML495/CML494)/QROO78_24989	242919	CML495/CML494	SEEDGWAS503	1	LT	LT	95	97	6	24989	MEX	QROO 78	TUXPEN		NA							FELIPE CARRILLO PUERTO	PUERTO ARTURO	19.35	-88.03
28854	QROO75_24990	241574	(CML495/CML494)/QROO75_24990	242919	CML495/CML494	SEEDGWAS504	2	LT	LT	88	91	6	24990	MEX	QROO 75	TUXPEN		NA							FELIPE CARRILLO PUERTO	PUERTO ARTURO	19.35	-88.03
28862	CHIS474_25003	242227	(CML373/CML311)/CHIS474_25003	242914	CML373/CML311	SEEDGWAS1156	1	ST	ST	89	89	3	25003	MEX	CHIS 474	TUXPEN		NA								ANGEL ALBINO CORZO	15.52	-92.44
28868	SINA176_25021	239052	(CML269/CML264)/SINA176_25021	242913	CML269/CML264	SEEDGWAS2258	1	LT	LT	79	84	8	25021	MEX	SINA 176			NA							EL FUERTE	CAPOMOS	26.25	-108.3
28886	QROO84_25055	242103	(CML269/CML264)/QROO84_25055	242913	CML269/CML264	SEEDGWAS1032	2	LT	LT	87	88	6	25055	MEX	QROO 84	TUXPEN	NALTEL	NA							FELIPE CARRILLO PUERTO	EJIDO PIEDRAS NEGRAS	19.35	-88.03
28888	TABA15_25057	242781	(CML495/CML494)/TABA15_25057	242919	CML495/CML494	SEEDGWAS1710	1	LT	LT	83	84	6	25057	MEX	TABA 15	TUXPEN		NA							HUIMANGUILLO	FRANCISCO TRUJILLO GARCIA	17.51	-93.24
28890	QROO80_25063	241576	(CML269/CML264)/QROO80_25063	242913	CML269/CML264	SEEDGWAS506	1	LT	LT	88	89	6	25063	MEX	QROO 80	TUXPEN	DZITBA	NA							FELIPE CARRILLO PUERTO	EJIDO MORELOS	19.35	-88.03
28897	GUER208_25081	242104	(CML451/CML486)/GUER208_25081	242916	CML451/CML486	SEEDGWAS1033	2	LT	LT	90	90	2	25081	MEX	GUER 208	VANDEN	HARIN8	NA								COAHUAYUTLA	18.19	-101.4
28898	QROO61_25084	241577	(CML269/CML264)/QROO61_25084	242913	CML269/CML264	SEEDGWAS507	1	LT	LT	95	95	6	25084	MEX	QROO 61	TUXPEN	DZITBA	NA							JOSE MARIA MORELOS	RANCHO STA. MARGARITA EJIDO LA PRESUMIDA	19.35	-88.03
28900	YUCA114_25085	241578	(CML269/CML264)/YUCA114_25085	242913	CML269/CML264	SEEDGWAS508	2	LT	LT	100	101	3	25085	MEX	YUCA 114			NA								TAHMEK	20.53	-89.15
28901	QROO49_25087	241579	(CML269/CML264)/QROO49_25087	242913	CML269/CML264	SEEDGWAS509	1	LT	LT	90	98	8	25087	MEX	QROO 49	TUXPEN	DZITBA	NA							FELIPE CARRILLO PUERTO	EJIDO DOZULA	19.35	-88.03
28902	VERA572_25091	239053	(CML269/CML264)/VERA572_25091	242913	CML269/CML264	SEEDGWAS2259	2	LT	LT	106	110	3	25091	MEX	VERA 572			NA								PLAYA VICENTE	17.5	-95.48
28906	VERA577_25093	242105	(CML451/CML486)/VERA577_25093	242916	CML451/CML486	SEEDGWAS1034	1	LT	LT	95	98	6	25093	MEX	VERA 577			NA								TEOCELO	19.23	-96.58
28964	OAXA541_25217	242783	(CML269/CML264)/OAXA541_25217	242913	CML269/CML264	SEEDGWAS1712	2	LT	LT	62	64	8	25217	MEX	OAXA 541	ZAPCHI		NA	C			A			MAGDALENA TLACOTEPEC	MAGDALENA TLACOTEPEC	16.5	-95.2
28967	JALI442_25225	242786	(CML373/CML311)/JALI442_25225	242914	CML373/CML311	SEEDGWAS1715	1	LT	ST	62	61	3	25225	MEX	JALI 442			NA	C			A	F		VILLA PURIFICACION	PURIFICACION	19.71	-104.6
28968	JALI443_25226	242787	(CML269/CML264)/JALI443_25226	242913	CML269/CML264	SEEDGWAS1716	1	LT	LT	61	60	8	25226	MEX	JALI 443			NA	C			B	A		VILLA PURIFICACION	PURIFICACION	19.71	-104.6
28969	JALI398_25228	242788	(CML269/CML264)/JALI398_25228	242913	CML269/CML264	SEEDGWAS1717	2	LT	LT	68	67	1	25228	MEX	JALI 398			NA	C			A			TOMATLAN	TOMATLAN	19.94	-104.2
29060	SNLP201_25299	241582	(CML269/CML264)/SNLP201_25299	242913	CML269/CML264	SEEDGWAS512	1	LT	LT	85	85	5	25299	MEX	SNLP 201	TUXPEN	DZITBA	NA	C			B	F				NA	NA
29095	OAXA555_25311	242796	(CML269/CML264)/OAXA555_25311	242913	CML269/CML264	SEEDGWAS1725	1	LT	LT	87	89	6	25311	MEX	OAXA 555			NA	C			A			SAN JUAN COTZOCON	SAN JUAN COTZOCON	17.16	-95.78
29097	OAXA556_25312	242797	(CML373/CML311)/OAXA556_25312	242914	CML373/CML311	SEEDGWAS1726	2	LT	LT	90	91	6	25312	MEX	OAXA 556			NA	C			B	F		SAN JUAN COTZOCON	SAN JUAN COTZOCON	17.16	-95.78
29128	ARZM05055_25539	240827	(CML495/CML494)/ARZM05055_25539	242919	CML495/CML494	SEEDGWAS4030	1	LT	LT	92	93	6	25539	ARG	ARZM 05 055	PERLIT		NA	G			A	I		MISIONES	RUTA ALICIA KM. 33	-27.2	-54.43
29135	ARZM06013_25554	242800	(CML495/CML494)/ARZM06013_25554	242919	CML495/CML494	SEEDGWAS1729	2	LT	LT	78	82	8	25554	ARG	ARZM 06 013	DENBLA		NA	C			A			CHACO	COSTA GUAYCURU	-26.77	-59.12
29137	ARZM06015_25555	242801	(CML495/CML494)/ARZM06015_25555	242919	CML495/CML494	SEEDGWAS1730	2	LT	LT	80	79	4	25555	ARG	ARZM 06 015	DENBLA		NA	C			A			CHACO	COSTA GUAYCURU	-26.77	-59.12
29146	ARZM06050_25561	241590	(CML495/CML494)/ARZM06050_25561	242919	CML495/CML494	SEEDGWAS520	2	LT	LT	86	86	5	25561	ARG	ARZM 06 050	CRAMAN		NA	F			B			CHACO	PRESIDENCIA ROQUE SAENZ PENA	-26.87	-60.45
29156	ARZM07061_25577	241593	(CML269/CML264)/ARZM07061_25577	242913	CML269/CML264	SEEDGWAS523	1	LT	LT	76	76	4	25577	ARG	ARZM 07 061	AVMORO		NA	F			F			FORMOSA	MISION FRANCISCANA TACAAGLE	-24.92	-58.8
29158	ARZM07119_25581	241594	(CML269/CML264)/ARZM07119_25581	242913	CML269/CML264	SEEDGWAS524	2	LT	LT	80	77	6	25581	ARG	ARZM 07 119	AVMORO		NA	A			B			FORMOSA	CAMPO HARDY	-26.13	-59.48
29163	ARZM07123_25582	241595	(CML269/CML264)/ARZM07123_25582	242913	CML269/CML264	SEEDGWAS525	1	LT	LT	80	81	4	25582	ARG	ARZM 07 123	DENBLA		NA	C			A	B		FORMOSA	RACEDO ESCOBAR	-26.15	-59.63
29165	ARZM07125_25583	242804	(CML495/CML494)/ARZM07125_25583	242919	CML495/CML494	SEEDGWAS1733	1	LT	LT	89	81	8	25583	ARG	ARZM 07 125	DENBLA		NA	C			A	B		FORMOSA	COLONIA BANADEROS	-25.33	-59.68
29169	ARZM10072_25590	240142	(CML269/CML264)/ARZM10072_25590	242913	CML269/CML264	SEEDGWAS3348	2	LT	LT	92	95	6	25590	ARG	ARZM 10 072	DENBLA		NA	C			A			TUCUMAN	NUEVA ESPANA	-27.27	-65.23
29184	ARZM13050_25621	239059	(CML269/CML264)/ARZM13050_25621	242913	CML269/CML264	SEEDGWAS2265	1	LT	LT	83	84	4	25621	ARG	ARZM 13 050	PERLA		NA	G			B	A		LA RIOJA	GRAL. JUAN FACUNDO QUIROGA, POTRERO	-30.83	-66.75
29240	ARZM14068_25664	239061	(CML269/CML264)/ARZM14068_25664	242913	CML269/CML264	SEEDGWAS2267	2	LT	LT	86	86	5	25664	ARG	ARZM 14 068	CRAMAN		NA	D			I	J	B	CORDOBA	ALTA GRACIA	-31.67	-64.55
29241	ARZM14071_25667	239062	(CML269/CML264)/ARZM14071_25667	242913	CML269/CML264	SEEDGWAS2268	2	LT	LT	82	83	4	25667	ARG	ARZM 14 071	CRAMAN		NA	F	D		I	J		CORDOBA	ALTA GRACIA	-31.67	-64.55
29247	ARZM17015_25704	239064	(CML269/CML264)/ARZM17015_25704	242913	CML269/CML264	SEEDGWAS2270	1	LT	LT	79	76	6	25704	ARG	ARZM 17 015	PISING		NA	G			A			SAN LUIS	BELGRANO, BARRANCAS COLORADAS (EL MILAGRO)	-33.1	-66.37
29260	ARZM18025_25728	240830	(CML269/CML264)/ARZM18025_25728	242913	CML269/CML264	SEEDGWAS4033	1	LT	LT	81	84	4	25728	ARG	ARZM 18 025	MDULCE		NA	H	F		A			LA PAMPA	EDUARDO CASTEX	-37.9	-64.32
29271	CHIS621_25788	241597	(CML269/CML264)/CHIS621_25788	242913	CML269/CML264	SEEDGWAS527	2	LT	LT	92	93	6	25788	MEX	CHIS 621	TUXPEN		NA	C			A	I			OCOZOCUAUTLA ESPINO	16.77	-93.38
29272	QROO102_25790	241598	(CML269/CML264)/QROO102_25790	242913	CML269/CML264	SEEDGWAS528	2	LT	LT	86	87	8	25790	MEX	QROO 102	DZITBA		NA	C	F		A			OTHON P. BLANCO	EJIDO CAOBA KM. 87	19.62	-89
29279	CAMP181_25802	241599	(CML495/CML494)/CAMP181_25802	242919	CML495/CML494	SEEDGWAS529	2	LT	LT	89	89	6	25802	MEX	CAMP 181	TUXPEN	DZITBA	NA	C			A	B		TENABO	TINUN	20.02	-90.22
29292	NAYA142_25808	242808	(CML269/CML264)/NAYA142_25808	242913	CML269/CML264	SEEDGWAS1737	2	LT	LT	69	72	1	25808	MEX	NAYA 142			NA	F	C		A				SANTIAGO IXCUINTLA	21.82	-105.2
29323	NAYA139_25814	241600	(CML269/CML264)/NAYA139_25814	242913	CML269/CML264	SEEDGWAS530	1	LT	LT	77	74	6	25814	MEX	NAYA 139			NA	F			A				SANTIAGO IXCUINTLA	21.82	-105.2
29356	TABA26_25828	241601	(CML495/CML494)/TABA26_25828	242919	CML495/CML494	SEEDGWAS531	2	LT	LT	89	92	6	25828	MEX	TABA 26	COMITE	TUXPEN	NA	F			B	A		TACOTALPA	EJIDO XICOTENCATL	17.36	-92.49
29431	BRAZMA018_25952	239443	(CML373/CML311)/BRAZMA018_25952	242914	CML373/CML311	SEEDGWAS2649	1	ST	ST	102	106	5	25952	BRA	BRAZ MA 018			NA	C			F	B				NA	NA
29513	BRAZWP029_26369	239448	(CML269/CML264)/BRAZWP029_26369	242913	CML269/CML264	SEEDGWAS2654	2	ST	LT	90	105	2	26369	BRA	BRAZ WP029	DENTAD		NA	C			A					NA	NA
29583	ARZM06044_26665	242822	(CML495/CML494)/ARZM06044_26665	242919	CML495/CML494	SEEDGWAS1751	1	LT	LT	86	89	6	26665	ARG	ARZM 06 044	VENEZO		NA	F			B			CHACO	COMANDANTE FERNANDEZ, PCIA. ROQUE SAENZ PENA	-26.87	-60.45
29586	ARZM07018_26699	241607	(CML495/CML494)/ARZM07018_26699	242919	CML495/CML494	SEEDGWAS537	1	LT	LT	89	89	6	26699	ARG	ARZM 07 018	AVMORO		NA	A	E		B			FORMOSA	PILCOMAYO, SIETE PALMAS	-25.2	-58.33
29587	ARZM07020_26701	241608	(CML495/CML494)/ARZM07020_26701	242919	CML495/CML494	SEEDGWAS538	2	LT	LT	87	90	6	26701	ARG	ARZM 07 020	AVMORO		NA	F	A		B	A		FORMOSA	PILCOMAYO, SIETE PALMAS (LAGUNA PE)	-25.2	-58.33
29594	ARZM07039_26712	241609	(CML269/CML264)/ARZM07039_26712	242913	CML269/CML264	SEEDGWAS539	2	LT	LT	80	83	7	26712	ARG	ARZM 07 039	VENEZO		NA	F			B			FORMOSA	PILAGAS, SANTA ROSA	-23.78	-61.48
29597	ARZM07041_26714	241611	(CML269/CML264)/ARZM07041_26714	242913	CML269/CML264	SEEDGWAS541	1	LT	LT	85	83	6	26714	ARG	ARZM 07 041	PERLIT		NA	F			G			FORMOSA	PILAGAS, SANTA ROSA	-23.78	-61.48
29600	ARZM07042_26715	241612	(CML269/CML264)/ARZM07042_26715	242913	CML269/CML264	SEEDGWAS542	1	LT	LT	85	82	6	26715	ARG	ARZM 07 042	AVMORO		NA	A			B			FORMOSA	PILAGAS, SANTA ROSA	-23.78	-61.48
29606	ARZM07102_26738	241614	(CML269/CML264)/ARZM07102_26738	242913	CML269/CML264	SEEDGWAS544	2	LT	LT	80	80	4	26738	ARG	ARZM 07 102	AVMORO		NA	A			B	A		FORMOSA	PIRANE, COLONIA ESPERANZA	-25	-60
29615	ARZM07118_26749	241617	(CML269/CML264)/ARZM07118_26749	242913	CML269/CML264	SEEDGWAS547	1	LT	LT	80	83	7	26749	ARG	ARZM 07 118	AVMORO		NA	A			B			FORMOSA	PIRANE, VILLA DOS TRECE	-26.17	-59.32
29616	ARZM07124_26750	241618	(CML269/CML264)/ARZM07124_26750	242913	CML269/CML264	SEEDGWAS548	2	LT	LT	78	80	4	26750	ARG	ARZM 07 124	AVMORO		NA	A			B	A		FORMOSA	PATINO, COLONIA BANADEROS	-25	-60
29619	ARZM07143_26757	242113	(CML269/CML264)/ARZM07143_26757	242913	CML269/CML264	SEEDGWAS1042	2	LT	LT	72	72	1	26757	ARG	ARZM 07 143	AVMORO		NA	A			B	E	K	FORMOSA	BERMEJO, DR. GUMERCINDO SAYAGO	-25	-60
29623	CHIS675_26869	242114	(CML451/CML486)/CHIS675_26869	242916	CML451/CML486	SEEDGWAS1043	1	LT	LT	90	92	6	26869	MEX	CHIS 675	COMITE		NA	C			B	I			OCOSINGO	17.05	-92.2
29624	CHIS677_26873	242115	(CML269/CML264)/CHIS677_26873	242913	CML269/CML264	SEEDGWAS1044	1	LT	LT	88	87	6	26873	MEX	CHIS 677	COMITE	TUXPEN	NA	F			B	I	A		OCOSINGO	16.9	-92.08
29681	BRAZ3923LC_27186	239069	(CML269/CML264)/BRAZ3923LC_27186	242913	CML269/CML264	SEEDGWAS2275	1	LT	LT	111	110	8	27186	BRA	BRAZ 3923LC			NA							RORAIMA	BOA VISTA	2	-60.5
29686	BRAZ4039LC_27189	240159	(CML269/CML264)/BRAZ4039LC_27189	242913	CML269/CML264	SEEDGWAS3365	1	LT	LT	108	112	3	27189	BRA	BRAZ 4039LC			NA							RORAIMA	CARACARAI	1.83	-61.13
29822	GUAT1006_27514	239075	(CML269/CML264)/GUAT1006_27514	242913	CML269/CML264	SEEDGWAS2281	2	LT	LT	97	100	6	27514	GTM	GUAT 1006			NA	C			A	F		EL PROGRESO		14.85	-90.07
29827	GUAT1009_27517	239077	(CML269/CML264)/GUAT1009_27517	242913	CML269/CML264	SEEDGWAS2283	1	LT	LT	94	99	6	27517	GTM	GUAT 1009			NA	C			A			EL PROGRESO		14.85	-90.07
29833	GUAT1010_27518	239078	(CML269/CML264)/GUAT1010_27518	242913	CML269/CML264	SEEDGWAS2284	1	LT	LT	91	91	6	27518	GTM	GUAT 1010			NA	C			A	J		EL PROGRESO		14.85	-90.07
29834	GUAT1011_27519	239079	(CML269/CML264)/GUAT1011_27519	242913	CML269/CML264	SEEDGWAS2285	1	LT	LT	88	88	6	27519	GTM	GUAT 1011			NA	C			A	J		EL PROGRESO		14.85	-90.07
29838	GUAT1014_27522	239081	(CML269/CML264)/GUAT1014_27522	242913	CML269/CML264	SEEDGWAS2287	1	LT	LT	91	92	6	27522	GTM	GUAT 1014			NA	C			A			EL PROGRESO		14.85	-90.07
29839	GUAT1015_27523	239082	(CML269/CML264)/GUAT1015_27523	242913	CML269/CML264	SEEDGWAS2288	1	LT	LT	89	90	6	27523	GTM	GUAT 1015			NA	C			A	B		EL PROGRESO		14.85	-90.07
29841	GUAT1019_27527	239083	(CML269/CML264)/GUAT1019_27527	242913	CML269/CML264	SEEDGWAS2289	1	LT	LT	90	93	6	27527	GTM	GUAT 1019			NA	C			A			EL PROGRESO		14.85	-90.07
29842	GUAT1020_27528	239084	(CML269/CML264)/GUAT1020_27528	242913	CML269/CML264	SEEDGWAS2290	2	LT	LT	88	90	6	27528	GTM	GUAT 1020			NA	C			A			EL PROGRESO		14.85	-90.07
29867	GUAT1079_27585	239087	(CML269/CML264)/GUAT1079_27585	242913	CML269/CML264	SEEDGWAS2293	1	LT	LT	82	84	4	27585	GTM	GUAT 1079			NA	F	C		A	J		CHIQUIMULA		14.67	-89.42
29906	GUAT1083_27589	239088	(CML269/CML264)/GUAT1083_27589	242913	CML269/CML264	SEEDGWAS2294	1	LT	LT	89	95	6	27589	GTM	GUAT 1083			NA	F			A			CHIQUIMULA		14.67	-89.42
29916	GUAT1086_27592	239090	(CML269/CML264)/GUAT1086_27592	242913	CML269/CML264	SEEDGWAS2296	1	LT	LT	93	96	6	27592	GTM	GUAT 1086			NA	C			A			CHIQUIMULA		14.67	-89.42
29926	GUAT1087_27593	239091	(CML269/CML264)/GUAT1087_27593	242913	CML269/CML264	SEEDGWAS2297	1	LT	LT	89	94	6	27593	GTM	GUAT 1087			NA	C			A	J		CHIQUIMULA		14.67	-89.42
29950	GUAT1094_27599	239095	(CML269/CML264)/GUAT1094_27599	242913	CML269/CML264	SEEDGWAS2301	2	LT	LT	89	91	6	27599	GTM	GUAT 1094			NA	C			A			RETALHULEU		14.33	-91.83
30051	GUAT1161_27652	241622	(CML269/CML264)/GUAT1161_27652	242913	CML269/CML264	SEEDGWAS552	2	LT	LT	81	88	8	27652	GTM	GUAT 1161			NA	C			A			PETEN		16.25	-89.83
30057	GUAT1165_27656	241624	(CML269/CML264)/GUAT1165_27656	242913	CML269/CML264	SEEDGWAS554	2	LT	LT	78	80	4	27656	GTM	GUAT 1165			NA	C			A			PETEN		16.25	-89.83
30058	GUAT1166_27657	241625	(CML269/CML264)/GUAT1166_27657	242913	CML269/CML264	SEEDGWAS555	1	LT	LT	89	71	8	27657	GTM	GUAT 1166			NA	C			A			PETEN		16.25	-89.83
30059	GUAT1167_27658	241626	(CML269/CML264)/GUAT1167_27658	242913	CML269/CML264	SEEDGWAS556	2	LT	LT	79	79	4	27658	GTM	GUAT 1167			NA	C			A			PETEN		16.25	-89.83
30073	GUAT1175_27666	241630	(CML269/CML264)/GUAT1175_27666	242913	CML269/CML264	SEEDGWAS560	1	LT	LT	79	80	4	27666	GTM	GUAT 1175			NA	C			A			PETEN		16.25	-89.83
30075	GUAT1177_27668	241632	(CML495/CML494)/GUAT1177_27668	242919	CML495/CML494	SEEDGWAS562	1	LT	LT	87	87	6	27668	GTM	GUAT 1177			NA	C			A	B		PETEN		16.25	-89.83
30076	GUAT1178_27669	241633	(CML495/CML494)/GUAT1178_27669	242919	CML495/CML494	SEEDGWAS563	1	LT	LT	86	86	5	27669	GTM	GUAT 1178			NA	F			A			PETEN		16.25	-89.83
30078	GUAT1180_27671	241634	(CML269/CML264)/GUAT1180_27671	242913	CML269/CML264	SEEDGWAS564	1	LT	LT	83	86	4	27671	GTM	GUAT 1180			NA	C			A			PETEN		16.25	-89.83
30079	HIDA240_29309	242116	(CML269/CML264)/HIDA240_29309	242913	CML269/CML264	SEEDGWAS1045	1	LT	LT	88	87	6	29309	MEX	HIDA 240	OLOTIL	TEPECI	NA	C			F	B	D	HUAUTLA	TAMOYON I	21.02	-98.23
30108	HIDA260_29329	242122	(CML373/CML311)/HIDA260_29329	242914	CML373/CML311	SEEDGWAS1051	1	LT	LT	88	89	6	29329	MEX	HIDA 260	ANCHO	OLOTIL	NA	C			A			HUAUTLA	TZACUALA, GUILLERMO ROSEL	21.1	-98.22
30140	HIDA278_29347	241637	(CML495/CML494)/HIDA278_29347	242919	CML495/CML494	SEEDGWAS567	1	LT	LT	91	92	6	29347	MEX	HIDA 278	OLOTIL	TEPECI	NA	C			B			ATLAPEXCO	TLACHAPA, BARRIO ARRIBA	20.98	-98.37
30148	HIDA291_29360	241638	(CML495/CML494)/HIDA291_29360	242919	CML495/CML494	SEEDGWAS568	1	LT	LT	90	93	6	29360	MEX	HIDA 291	OLOTIL	TEPECI	NA	C	F		B	F		ATLAPEXCO	TLACHAPA, BARRIO ARRIBA	20.98	-98.37
30149	HIDA293_29362	242125	(CML269/CML264)/HIDA293_29362	242913	CML269/CML264	SEEDGWAS1054	1	LT	LT	90	88	6	29362	MEX	HIDA 293	OLOTIL	ANCHO	NA	C			A			HUEJUTLA DE REYES	LOS PARAJES, FRENTE A LA SECUNDARIA	21.17	-98.28
30150	HIDA295_29364	242126	(CML451/CML486)/HIDA295_29364	242916	CML451/CML486	SEEDGWAS1055	2	LT	LT	91	89	6	29364	MEX	HIDA 295	TUXPEN	OLOTIL	NA	C			B	J		HUEJUTLA DE REYES	LOS PARAJES, BARRIO BAJO	21.17	-98.28
30153	HIDA297_29366	241639	(CML269/CML264)/HIDA297_29366	242913	CML269/CML264	SEEDGWAS569	1	LT	LT	96	96	6	29366	MEX	HIDA 297	TEPECI	OLOTIL	NA	A	C		K	C	A	HUEJUTLA DE REYES	LOS PARAJES, BARRIO BAJO	21.17	-98.28
30158	HIDA298_29367	242127	(CML269/CML264)/HIDA298_29367	242913	CML269/CML264	SEEDGWAS1056	2	LT	LT	88	89	6	29367	MEX	HIDA 298	OLOTIL		NA	C			B			HUEJUTLA DE REYES	EJIDO CALMECATE, CARR. A RANCHO VIEJO	21.15	-98.33
30165	HIDA313_29382	241640	(CML269/CML264)/HIDA313_29382	242913	CML269/CML264	SEEDGWAS570	1	LT	LT	97	97	6	29382	MEX	HIDA 313	OLOTIL	TUXPEN	NA	C			B	F		YAHUALICA	PEPEYOCATITLA	20.9	-98.38
30185	HIDA324_29393	241643	(CML269/CML264)/HIDA324_29393	242913	CML269/CML264	SEEDGWAS573	1	LT	LT	92	95	6	29393	MEX	HIDA 324	OLOTIL	TEPECI	NA	C			B			HUEJUTLA DE REYES	LEMONTITLA, A PIE DE CARRETERA	21.17	-98.48
30189	HIDA331_29400	242130	(CML451/CML486)/HIDA331_29400	242916	CML451/CML486	SEEDGWAS1059	2	LT	LT	90	88	6	29400	MEX	HIDA 331	OLOTIL	TEPECI	NA	C			B	F		HUEJUTLA DE REYES	LA CORRALA, A LADO DEL RIO	21.17	-98.5
30190	SNLP287_29414	241644	(CML269/CML264)/SNLP287_29414	242913	CML269/CML264	SEEDGWAS574	2	LT	LT	86	86	5	29414	MEX	SNLP 287	OLOTIL		NA	C			B			TAMAZUNCHALE	MECATLAN, BARRIO ATLAJQUE	21.22	-98.78
30200	SNLP299_29426	242133	(CML269/CML264)/SNLP299_29426	242913	CML269/CML264	SEEDGWAS1062	1	LT	LT	86	87	6	29426	MEX	SNLP 299	TUXPEN	OLOTIL	NA	C			B	J		AXTLA DE TERRAZAS	TEMALACACO	21.4	-98.83
30218	SNLP319_29445	242137	(CML451/CML486)/SNLP319_29445	242916	CML451/CML486	SEEDGWAS1066	2	LT	LT	92	94	6	29445	MEX	SNLP 319	OLOTIL	TEPECI	NA	C			B			MATLAPA	TEXQUITOTE SEGUNDO	21.28	-98.82
30225	SNLP323_29449	242138	(CML269/CML264)/SNLP323_29449	242913	CML269/CML264	SEEDGWAS1067	1	LT	LT	91	91	6	29449	MEX	SNLP 323	OLOTIL	TUXPEN	NA	C			B	A		MATLAPA	TEXQUITOTE SEGUNDO	21.28	-98.82
30228	SNLP324_29450	242139	(CML495/CML494)/SNLP324_29450	242919	CML495/CML494	SEEDGWAS1068	1	LT	LT	92	92	6	29450	MEX	SNLP 324	OLOTIL		NA	C			A	J		MATLAPA	TEXQUITOTE SEGUNDO	21.28	-98.82
30230	SNLP328_29454	241646	(CML495/CML494)/SNLP328_29454	242919	CML495/CML494	SEEDGWAS576	1	LT	LT	95	96	6	29454	MEX	SNLP 328	OLOTIL	TEPECI	NA	C			B	F	A	MATLAPA	PAPATLAS	21.37	-98.78
30231	SNLP334_29460	241647	(CML495/CML494)/SNLP334_29460	242919	CML495/CML494	SEEDGWAS577	1	LT	LT	87	91	6	29460	MEX	SNLP 334	TUXPEN	OLOTIL	NA	C			A			MATLAPA	PAPATLAS	21.37	-98.78
30232	SNLP337_29463	242140	(CML269/CML264)/SNLP337_29463	242913	CML269/CML264	SEEDGWAS1069	1	LT	LT	90	89	2	29463	MEX	SNLP 337	OLOTIL	TEPECI	NA	C			B	F		TAMPACAN	CHILILILLO	21.38	-98.75
30233	SNLP339_29465	242141	(CML451/CML486)/SNLP339_29465	242916	CML451/CML486	SEEDGWAS1070	2	LT	LT	90	89	2	29465	MEX	SNLP 339	OLOTIL	TEPECI	NA	C			B	F		TAMPACAN	CHUPADERO	21.4	-98.73
30235	SNLP340_29466	242142	(CML373/CML311)/SNLP340_29466	242914	CML373/CML311	SEEDGWAS1071	2	LT	LT	87	84	6	29466	MEX	SNLP 340	OLOTIL		NA	C			B			TAMPACAN	CUAYAHUAL	21.4	-98.77
30246	SNLP348_29474	241649	(CML269/CML264)/SNLP348_29474	242913	CML269/CML264	SEEDGWAS579	2	LT	LT	98	100	6	29474	MEX	SNLP 348	OLOTIL	TEPECI	NA	C			A			SN MARTIN CHALCHICUAUT	CHILIATL	21.37	-98.62
30249	SNLP351_29477	241651	(CML269/CML264)/SNLP351_29477	242913	CML269/CML264	SEEDGWAS581	1	LT	LT	102	100	3	29477	MEX	SNLP 351	OLOTIL	TUXPEN	NA	C			A			SN MARTIN CHALCHICUAUT	TANCHINOL	21.37	-98.62
30251	SNLP353_29479	241652	(CML269/CML264)/SNLP353_29479	242913	CML269/CML264	SEEDGWAS582	1	LT	LT	98	98	6	29479	MEX	SNLP 353	OLOTIL	TEPECI	NA	C			A	J		SN MARTIN CHALCHICUAUT	TANCHINOL	21.37	-98.62
30254	SNLP359_29485	241654	(CML269/CML264)/SNLP359_29485	242913	CML269/CML264	SEEDGWAS584	2	LT	LT	91	95	6	29485	MEX	SNLP 359	OLOTIL	TUXPEN	NA	C			A	B		HUEHUETLAN	HUEHUETLAN	21.53	-98.97
30267	SNLP371_29497	242146	(CML373/CML311)/SNLP371_29497	242914	CML373/CML311	SEEDGWAS1075	1	LT	LT	90	86	6	29497	MEX	SNLP 371	OLOTIL	TUXPEN	NA	C			A	J		XILITLA	APETZCO	21.38	-99
30270	SNLP372_29498	242147	(CML451/CML486)/SNLP372_29498	242916	CML451/CML486	SEEDGWAS1076	2	LT	LT	88	89	6	29498	MEX	SNLP 372	OLOTIL	TEPECI	NA	C	A		I	K	A	XILITLA	APETZCO	21.38	-99
30271	VERA745_29501	241655	(CML269/CML264)/VERA745_29501	242913	CML269/CML264	SEEDGWAS585	2	LT	LT	90	96	6	29501	MEX	VERA 745	TUXPEN	OLOTIL	NA	C			A			TANTOYUCA	LOS AJOS, SANTA CLARA	21.18	-98.13
30274	VERA749_29505	242149	(CML269/CML264)/VERA749_29505	242913	CML269/CML264	SEEDGWAS1078	2	LT	LT	82	89	6	29505	MEX	VERA 749	OLOTIL	TEPECI	NA	C			B			TANTOYUCA	LOS AJOS, SANTA CLARA	21.18	-98.13
30278	VERA773_29529	241656	(CML269/CML264)/VERA773_29529	242913	CML269/CML264	SEEDGWAS586	1	LT	LT	95	97	6	29529	MEX	VERA 773	TEPECI	OLOTIL	NA	C			B	A		CHICONAMEL	CHICONAMEL	21.22	-98.45
30283	VERA786_29541	241657	(CML495/CML494)/VERA786_29541	242919	CML495/CML494	SEEDGWAS587	2	LT	LT	89	92	6	29541	MEX	VERA 786	OLOTIL	TUXPEN	NA	C			A			IXCATEPEC	EJIDO POZA AZUL	21.17	-97.98
30285	VERA788_29543	242152	(CML269/CML264)/VERA788_29543	242913	CML269/CML264	SEEDGWAS1081	2	LT	LT	93	87	8	29543	MEX	VERA 788	OLOTIL	ANCHO	NA	C			A			IXCATEPEC	EJIDO POZA AZUL	21.17	-97.98
